# Supplementary material for: A Scheme for Ultrasensitive Detection of Molecules with Vibrational Spectroscopy in Combination with Signal Processing
Source: Preprints.org preprint supplement (doi:10.20944/preprints201812.0101.v1), 2018-12-10
Supplement: Supplementary file 1 [file supplementary]

## Sheet: IR spectra
intensities are given as dipole strength in 10^-40 esu^2 cm^2
A232 IR spectrum
Harmonic								Anharmonic
B3LYP				PBE				B3LYP				PBE
6-311g+(2d,2p)		6-31g		6-311g+(2d,2p)		6-31g		6-311g+(2d,2p)		6-31g		6-311g+(2d,2p)		6-31g
cm-1	intensity	cm-1	intensity	cm-1	intensity	cm-1	intensity	cm-1	intensity	cm-1	intensity	cm-1	intensity	cm-1	intensity
16.8134	446.67	19.0984	421.972	14.6208	528.716	21.6095	322.63	16.8051	446.962	19.0966	422.116	14.5123	532.752	21.6049	322.754
45.9396	18.6619	51.3013	104.989	42.1989	15.1261	46.6044	45.3773	45.9389	18.6796	51.2985	105.259	42.1889	15.1486	46.6173	45.2962
60.5212	47.4473	62.4882	177.054	57.8445	63.6088	58.6885	205.022	60.5224	47.4266	62.4895	177.076	57.8399	63.6139	58.7011	204.638
77.4536	214.001	70.4824	193.061	76.5684	189.022	70.5976	174.24	77.4759	214.001	70.4798	192.865	76.5696	189.155	70.6139	174.55
86.9362	66.4057	85.2199	66.9941	82.8167	38.0169	82.8701	61.8026	86.9358	66.3463	85.2196	66.9709	82.8187	38.0208	82.8709	61.7683
107.745	11.5003	109.857	34.0013	96.7867	1.99085	108.239	22.7558	107.754	11.5475	109.857	33.9976	96.7805	1.93739	108.237	22.7525
109.808	21.9074	115.514	15.2787	107.907	18.5261	116.481	28.807	109.81	21.8598	115.505	15.2662	107.901	18.5307	116.481	28.8276
136.956	30.5883	127.593	54.016	130.732	45.3802	128.145	39.2637	136.957	30.5853	127.59	54.0207	130.729	45.4088	128.144	39.245
147.446	39.741	151.489	45.4614	137.713	39.3947	145.838	46.993	147.445	39.7437	151.49	45.461	137.703	39.4005	145.842	46.9755
181.722	0.695918	185.154	8.92021	181.238	1.55845	182.608	9.33952	181.71	0.69816	185.149	8.93552	181.238	1.56065	182.605	9.33746
206.383	95.9313	194.069	200.207	200.411	80.3051	191.032	173.393	206.38	95.8903	194.066	200.241	200.398	80.2425	191.027	173.341
214.11	6.18783	218.366	11.2868	209.164	9.65861	215.697	23.97	214.103	6.18989	218.366	11.2831	209.146	9.66135	215.693	23.9501
237.853	225.41	229.411	399.768	233.618	232.315	225.855	415.098	237.852	225.427	229.411	399.742	233.601	232.301	225.85	415.085
270.412	105.183	253.732	108.681	260.959	116.756	243.998	32.6299	270.41	105.215	253.734	108.651	260.951	116.797	243.998	32.5809
295.986	32.4653	257.8	51.0157	286.036	41.8179	247.445	83.704	295.987	32.4799	257.8	51.0311	286.027	41.8107	247.438	83.7677
330.378	80.2328	292.024	195.684	317.906	101.11	280.024	168.466	330.376	80.2115	292.024	195.662	317.903	101.131	280.027	168.388
344.212	102.096	331.247	74.4353	328.149	58.8813	315.893	103.352	344.211	102.083	331.247	74.3064	328.144	58.8166	315.885	103.403
381.153	42.7542	332.672	76.6263	364.512	41.1841	323.465	13.0141	381.152	42.7512	332.671	76.7142	364.51	41.1833	323.466	13.0252
414.986	31.2914	379.485	295.137	395.388	25.5979	356.955	231.236	414.985	31.2819	379.486	295.123	395.388	25.609	356.932	231.18
450.878	131.027	393.591	38.9634	431.214	147.993	381.673	17.6782	450.878	131.064	393.592	38.9734	431.213	147.951	381.661	17.709
462.499	125.882	446.659	151.434	441.199	75.8258	433.408	126.476	462.499	125.89	446.661	151.433	441.199	75.8467	433.409	126.509
495.613	160.3	468.367	174.391	476.225	126.673	454.062	134.096	495.609	160.317	468.368	174.409	476.222	126.687	454.06	134.077
538.713	47.3332	536.661	107.08	520.53	46.3993	521.36	142.328	538.718	47.3506	536.661	107.067	520.525	46.4074	521.352	142.537
582.038	580.304	541.024	198.182	556.875	508.401	523.887	123.599	582.043	580.399	541.029	198.269	556.866	508.572	523.881	123.287
614.839	48.1007	631.944	63.0784	587.192	49.1548	607.157	45.284	614.835	48.1075	631.943	63.0867	587.187	49.1559	607.161	45.2489
715.585	125.889	672.414	232.18	700.633	105.189	649.643	336.06	715.594	125.876	672.416	232.137	700.623	105.179	649.586	335.881
759.893	328.977	708.243	298.563	724.47	486.05	693.318	331.801	759.894	329.118	708.246	298.671	724.438	485.821	693.269	332.427
786.091	169.24	770.448	648.198	756.676	88.6537	737.854	622.658	786.082	169.133	770.459	648.199	756.665	88.7414	737.786	622.45
793.875	221.123	791.713	876.558	763.449	223.86	768.777	792.513	793.865	221.086	791.715	876.423	763.442	223.8	768.737	792.472
825.102	888.148	814.133	4.71545	789.542	807.679	787.917	3.47033	825.099	888.575	814.13	4.71105	789.534	807.604	787.909	3.4653
852.505	639.789	839.902	235.814	829.046	666.357	813.334	212.874	852.518	640.068	839.896	235.866	829.036	666.373	813.307	212.378
931.08	41.3619	942.958	50.6329	912.433	33.3792	926.922	60.795	931.074	41.3283	942.959	50.5732	912.425	33.3226	926.914	60.7482
979.493	185.524	983.465	126.776	958.214	194.377	952.17	1150.39	979.492	185.678	983.447	126.846	958.205	194.444	952.161	1149.88
1047.84	715.68	994.625	1553.59	1014.97	611.47	964.454	146.082	1047.86	715.934	994.632	1553.51	1014.98	612.135	964.427	145.665
1054.42	1604.79	1032.24	259.462	1019.43	1139.44	1012.47	235.502	1054.41	1605.31	1032.25	259.906	1019.44	1138.6	1012.42	236.54
1064.46	13.732	1051.52	284.901	1027.04	179.973	1028.07	309.521	1064.46	13.8441	1051.51	284.356	1027.02	179.736	1027.98	307.769
1067.44	221.69	1087.92	71.506	1031.98	241.645	1054.09	20.7983	1067.45	220.958	1087.92	71.4369	1031.98	241.69	1054.09	20.9126
1090.36	70.498	1096.96	39.8964	1055.07	38.0757	1057.63	32.8646	1090.36	70.5883	1096.97	39.9445	1055.05	38.0792	1057.63	32.9055
1103.49	11.1567	1109.4	100.734	1067.36	6.24449	1079.13	68.0315	1103.5	11.1071	1109.4	100.8	1067.36	6.22466	1079.12	67.9359
1118.63	34.2977	1127.34	42.8681	1080.17	33.7958	1094.86	47.4142	1118.63	34.3166	1127.35	42.8745	1080.18	33.8036	1094.86	47.502
1176.29	3.02455	1145.29	60.8798	1132.63	3.21969	1110.85	54.1137	1176.29	3.02081	1145.29	60.8831	1132.63	3.21829	1110.86	54.1145
1199.07	37.526	1162.59	0.387414	1155.9	35.3886	1123.22	1.38127	1199.08	37.4873	1162.59	0.387414	1155.9	35.3968	1123.22	1.37879
1202.88	104.202	1182.64	8.97296	1158.38	77.2783	1142.35	3.69656	1202.89	104.179	1182.64	8.98443	1158.37	77.1889	1142.34	3.65506
1243.12	82.8739	1226.24	3.29436	1202.47	142.476	1187.54	9.19598	1243.12	82.9644	1226.24	3.29175	1202.45	142.918	1187.55	9.18718
1271.16	854.304	1257.76	77.6982	1228.79	671.805	1221.99	70.1358	1271.16	854.274	1257.78	77.7134	1228.77	671.39	1221.98	70.0511
1317.66	143.585	1337.41	91.6153	1273.21	141.722	1297.9	98.9845	1317.67	143.506	1337.41	91.593	1273.21	141.741	1297.91	98.9537
1345.19	126.037	1359.84	91.0204	1299.5	125.337	1318.17	85.6711	1345.2	126.078	1359.86	91.0961	1299.49	125.272	1318.17	85.5955
1388.53	31.3451	1415.46	42.7335	1331.58	27.4223	1365.93	35.4687	1388.53	31.3812	1415.47	42.7145	1331.58	27.4004	1365.94	35.4793
1403.76	120.615	1423.13	164.405	1347.62	77.0744	1375.48	116.117	1403.76	120.599	1423.13	164.338	1347.62	77.1483	1375.48	116.142
1411.77	23.9318	1451.26	41.6021	1352.77	32.6753	1399.52	47.509	1411.77	23.8831	1451.27	41.6078	1352.77	32.685	1399.53	47.5306
1418.26	25.8794	1459.73	38.4699	1355.32	42.5024	1408.23	58.903	1418.26	25.8701	1459.73	38.4735	1355.33	42.5344	1408.23	58.9119
1423.76	28.7056	1466	47.2951	1364.7	35.5471	1416.17	46.7412	1423.75	28.6992	1466	47.2637	1364.7	35.5287	1416.17	46.7706
1470.95	360.607	1487	21.2979	1413.4	214.493	1435.07	14.7187	1470.97	360.567	1487	21.2651	1413.4	214.557	1435.06	14.7487
1476.65	2.93562	1504.98	233.194	1418.5	3.0585	1457.96	215.731	1476.65	2.97019	1504.99	232.972	1418.5	3.06468	1457.97	216.002
1485.52	13.6132	1514.32	262.556	1425.29	17.2749	1464.05	161.132	1485.53	13.5806	1514.32	262.888	1425.27	17.1833	1464.04	161.05
1493.95	83.6477	1527.61	27.8417	1435.3	93.4982	1476.81	113.948	1493.95	83.7405	1527.61	27.8027	1435.31	93.5228	1476.81	113.972
1496.43	14.7248	1528.29	61.732	1441.44	12.1383	1478.07	30.4131	1496.46	14.5979	1528.29	61.8155	1441.45	12.1585	1478.07	30.4405
1498.95	15.218	1534.29	22.3725	1441.94	18.8702	1488	28.1311	1498.96	15.2243	1534.32	22.3193	1441.93	18.8664	1488.02	28.1971
1499.21	10.8127	1536.59	12.3502	1444.67	10.7059	1491.3	19.3195	1499.22	10.8292	1536.59	12.327	1444.66	10.7065	1491.29	19.2582
1508.1	33.0557	1541.9	39.223	1454.32	34.8098	1496.11	73.0027	1508.1	33.0867	1541.9	39.221	1454.33	34.7112	1496.11	73.2358
1511.14	21.5541	1543.65	29.1408	1455.86	21.0459	1496.99	34.309	1511.14	21.5856	1543.65	29.1708	1455.85	20.9711	1496.99	34.1409
1512.61	62.5847	1550.17	68.4839	1456.94	52.4316	1502.8	78.8831	1512.62	62.5305	1550.19	68.5677	1456.94	52.6346	1502.81	78.8804
1513.72	24.9805	1556.22	72.3781	1458.23	28.6776	1506.6	44.0442	1513.73	25.0357	1556.21	72.3558	1458.24	28.6883	1506.6	44.0126
1532.39	41.808	1561.89	180.049	1478.31	68.0062	1511.67	104.13	1532.39	41.8501	1561.89	180.183	1478.32	67.999	1511.68	104.206
1633.99	2248.65	1621.86	1746.03	1589.91	2157.34	1575.73	1609.84	1633.99	2248.59	1621.86	1745.95	1589.9	2157.69	1575.7	1609.39
3038.46	28.5963	3048.76	32.4369	2974.69	91.3729	2986.02	27.2692	3038.49	28.777	3048.81	32.5997	2974.68	91.4026	2986.01	27.2564
3042.29	19.578	3053.31	20.8196	2976.75	23.3573	2987.86	33.9642	3042.29	19.5644	3053.33	20.823	2976.74	23.3282	2987.85	33.9444
3047.73	73.9512	3055.88	19.6807	2978.61	25.4701	2991.38	24.258	3047.74	75.318	3055.87	19.6799	2978.6	25.4058	2991.37	24.2286
3048.09	21.5044	3066.51	54.8754	2979.4	14.4274	2992.93	57.7498	3048.1	20.0696	3066.48	54.8106	2979.38	14.4828	2992.93	57.7966
3053.95	30.187	3071.19	33.7482	2983.02	40.3683	3000.55	38.3604	3053.95	30.088	3071.19	33.7777	2983.01	40.3816	3000.55	38.3312
3064.47	39.1749	3078.17	44.0606	2991.15	39.0612	3006.05	44.5522	3064.47	39.2166	3078.21	43.9607	2991.18	39.0107	3006.09	44.4794
3092.04	25.1963	3116.13	32.4343	3036.36	12.1048	3060.06	1.62493	3092.09	25.1197	3116.2	32.3561	3036.36	12.1117	3060.06	1.63823
3100	14.6587	3122.61	3.89216	3038.32	2.59402	3062.96	19.4368	3099.99	14.7015	3122.61	3.8316	3038.31	2.59928	3062.96	19.4298
3107.49	18.3849	3132.94	52.1371	3045.98	12.2569	3069.51	14.195	3107.48	18.0697	3132.96	52.0432	3046	12.2227	3069.53	14.1739
3108.88	34.4819	3133.76	11.6078	3048.93	20.7448	3080.09	42.3698	3108.89	34.7661	3133.73	11.6922	3048.92	20.7775	3080.08	42.3769
3119.59	20.9748	3146.86	44.2966	3052.82	36.8864	3082.93	19.5071	3119.59	20.9407	3146.85	44.2728	3052.8	36.961	3082.92	19.578
3120.27	18.4865	3149.51	10.5796	3054.35	23.6179	3083.24	23.8511	3120.32	18.4682	3149.58	10.6882	3054.34	23.576	3083.27	23.788
3129.45	32.4799	3153.96	22.7691	3060.41	29.1032	3086.8	30.2846	3129.45	32.4622	3153.9	22.7744	3060.4	29.1046	3086.78	30.2942
3133.05	13.5073	3161.76	20.9627	3068	18.263	3092.39	7.36138	3133.11	13.4655	3161.83	20.8183	3067.99	18.2853	3092.42	7.31475
3146.38	16.5562	3165.65	4.22436	3077.37	9.89569	3100.19	23.0803	3146.37	16.6053	3165.63	4.22314	3077.38	9.89074	3100.21	23.0766
3158.14	9.93742	3193.7	14.1598	3079.36	15.1358	3128.33	13.0946	3158.1	9.91317	3193.69	14.1716	3079.35	15.1347	3128.34	13.0762
								23.711	37.6147	39.189	1058.69	95.922	1713.84	83.465	598.36
								118.576	2112.06	80.101	88.9061	77.903	69.6521	89.329	31.7088
								121.079	140.692	59.884	192.644	93	1904.96	76.439	640.838
								86.085	220.893	69.054	6.28778	72.955	6260.42	65.645	6.95298
								71.389	51.617	96.924	191.792	210.765	53.744	96.659	166.719
								78.677	83.2212	100.458	116.936	57.814	69.2376	45.805	240.904
								102.28	698.704	126.743	49.1109	132.167	154.343	95.06	538.022
								136.931	45.5948	157.862	50.7887	118.097	139.257	154.864	44.1992
								138.718	71.9057	83.216	341.378	51.031	4.05104	46.424	31.8664
								229.582	17.0205	187.4	287.273	198.338	69.7084	191.819	169.756
								191.325	267.196	211.515	303.569	212.96	220.148	216.97	285.064
								191.652	7578.7	224.31	588.8	225.792	349.947	223.562	614.99
								230.355	354.312	260.955	57.3814	265.094	91.5939	238.153	212.683
								271.828	83.8961	249.23	260.931	272.746	60.4145	259.584	174.571
								285.614	42.6027	284.219	155.186	311.761	140.148	276.263	135.056
								326.622	71.6664	321.346	4976.25	314.796	52.8774	306.614	94.1374
								339.098	77.0671	329.117	3242.05	350.86	45.7049	320.106	19.908
								361.906	12.8826	371.748	243.137	392.198	13.5446	351.122	195.943
								400.405	31.6861	383.485	17.7661	419.245	190.239	384.703	29.003
								441.366	142.98	441.914	63.0724	422.215	121.549	432.226	12.0509
								457.014	94.3848	459.307	110.797	464.75	93.66	448.123	91.9663
								489.415	124.225	531.378	322.698	517.507	39.3616	517.688	705.609
								535.303	62.8128	538.062	82.2688	547.814	419.746	523.075	93.7171
								575.287	533.588	624.403	62.4559	562.035	101.457	599.449	29.2052
								607.441	42.0275	661.915	220.75	689.58	33.7589	638.508	308.469
								703.955	92.9155	696.987	173.198	708.63	594.49	681.683	244.515
								745.531	74.1169	753.792	284.257	771.974	126.326	725.26	459.32
								803.387	659.783	780.74	365.46	753.948	6.53155	758.725	203.003
								774.803	6.4597	815.604	28.6809	766.194	720.313	801.53	49.4692
								811.599	623.482	827.737	137.024	811.387	470.33	804.168	112.959
								836.293	587.865	925.533	47.8025	896.819	36.3471	911.257	63.0795
								914.214	31.9505	959.437	50.4765	932.673	97.8763	915.871	913.807
								955.857	142.882	957.327	1320.08	991.433	7016.36	945.056	9.03105
								1019.6	52.5535	1011.07	102.063	990.772	346.747	992.498	86.3684
								1023.33	2491.62	1031.89	326.422	995.36	453.565	1008.19	105.617
								1048.08	995.659	1062.95	70.7628	1001.85	149.711	1033.82	35.1965
								1047.01	359.308	1074.28	12.9085	1033.13	56.7581	1037.11	28.317
								1070.97	60.0205	1082.89	66.5214	1050.63	3.29669	1053.66	81.472
								1086	11.5518	1105.76	29.4383	1057.7	24.6938	1074.99	32.6352
								1097.76	10.1308	1118.38	58.7639	1100.72	1.77948	1089.17	17.1081
								1156.91	1.54833	1136.72	0.13822	1131.25	476.366	1098.39	0.676718
								1176.86	80.5712	1153.7	11.0761	1118.36	177.782	1116.2	3.56974
								1181.17	40.3516	1194.76	4.41183	1178.72	15.6364	1160.41	7.96948
								1217.39	3.95337	1221.35	30.9142	1209.74	69.1868	1186.99	38.7263
								1250.6	73.4314	1299.07	42.5562	1241.6	68.9507	1260.45	16.4719
								1295.24	200.267	1322.98	57.3331	1284.21	276.273	1290.44	103.176
								1327.02	63.1674	1380.3	52.3851	1311.99	86.0438	1333.61	22.6636
								1367.78	4.74264	1397.07	120.17	1331.73	206.818	1349.08	114.901
								1382.79	52.9417	1432.78	14.0031	1348.11	505.638	1401.52	47.927
								1402.13	49.0605	1433.04	64.7261	1334.28	171.575	1385.97	56.5065
								1392.08	6.80732	1437.08	33.1082	1325.24	79.6168	1379.77	20.517
								1386.22	40.9406	1449.23	13.5158	1378.47	145.662	1399.13	11.961
								1445.46	78.6968	1459.27	115.748	1368.66	932.609	1413.63	102.302
								1447.1	83.4903	1472.94	17.2602	1380.91	322.708	1424.62	190.143
								1446.24	61.611	1483.16	25.2892	1395.07	24.1329	1429.19	69.5093
								1459.93	26.1914	1481.07	78.085	1410.39	163.33	1426.02	19.2302
								1464.99	34.6974	1499.35	17.6548	1393.84	106.683	1461.96	8.33561
								1456.42	957.324	1498.32	21.7457	1403.57	93.1043	1454.3	19.0243
								1464.42	1777.83	1497.48	503.661	1413.75	198.73	1453.62	142.375
								1470.44	31.4656	1501.99	283.032	1410.27	327.423	1456.67	29.8045
								1465.24	122.83	1503.82	8.22998	1411.07	134.973	1466.64	140.677
								1476.93	274.875	1507.08	960.744	1416.65	275.961	1464.65	235.404
								1472.53	42.919	1516.43	502.933	1439.84	30.8788	1472.99	292.022
								1491.6	17.9093	1573.77	378.195	1544.53	266.497	1525.22	99.4496
								1597.33	16.1978	2926.78	35.5613	2871.78	41.5482	2851.09	132.646
								2888.14	113.956	2920.24	141.39	2870.43	80.3716	2865.01	79.1989
								2966.59	58.0099	2913.78	94.7418	2848.47	33.7358	2837.58	148.052
								2953.19	30.6987	2899.13	58.5257	2860.32	5244.95	2564.56	209.498
								2963.04	26.9403	2924.24	314.52	2853.9	1607.2	2855.89	162.301
								2912.9	16.7067	2929.95	186.414	2858.86	59.5209	2873.56	179.622
								2937.25	31.7983	2963.05	26.9492	2896.79	6.01952	2904.72	5.75729
								2955	24.2819	2986.01	7.35162	2890.64	33.3527	2916.28	3.78597
								2964.33	19.0012	2984.91	502.685	2891.78	10.1845	2921.88	1.19087
								2962.29	3.91813	2980.09	2513.69	2907.41	12.63	2928.54	47.4891
								2957.17	35.7923	3004.11	60.3865	2902.98	32.498	2934.69	13573.3
								2978.12	38.5341	3001.63	6.47278	2911.97	106.165	2927.3	11542.6
								2978.86	38.2568	3006.13	22.9287	2907.97	59.6741	2929.6	95.1061
								2993.38	41.0933	3009.51	9.34121	2914.58	10.5351	2940.82	33.9612
								2986.75	7.71027	3020.91	0.250543	2916.66	84.3263	2947.76	25.0327
								3003.48	9.1084	3042.49	16.8327	2931.59	80.2699	2956.42	15.1237
								3017.91	0.306474	81.067	0.71708	208.84	0.164456	177.486	0.29948
								53.7	0.831554	167.693	1.72341	162.911	1.1389	184.058	1.49583
								252.058	0.0188625	122.015	1.05315	187.005	1.09925	155.346	0.269008
								252.601	1.01044	136.692	0.158908	144.104	0.107194	128.092	0.145304
								173.915	1.14588	193.551	0.150695	502.137	41.3564	192.792	0.0129104
								140.43	0.550297	189.382	0.274338	110.829	1.19985	66.491	0.0972621
								140.384	4.60226	253.419	0.0159671	262.208	3.27104	180.706	0.304375
								203.238	1.01255	316.71	0.270593	234.752	1.65891	310.161	0.0820025
								274.526	1.50234	77.187	2.38726	393.161	0.57887	383.294	0.495499
								275.504	0.398845	374.165	2.81325	422.1	0.0906676	426.218	27.9303
								493.685	3.37933	412.5	1.55568	450.486	0.407668	446.152	0.123176
								380.152	0.265016	448.042	0.134833	528.212	8.63121	475.526	0.52205
								371.69	0.226843	521.703	0.149665	545.186	6.81339	519.508	0.150405
								459.094	0.326171	497.64	0.601922	623.66	0.00934578	551.963	0.112953
								543.885	0.0179462	568.001	0.0287875	629.162	0.420454	616.061	0.351086
								570.94	14.2887	641.533	1.02349	701.872	4.33854	640.564	0.00983175
								653.362	0.00323976	658.393	1.91802	781.719	0.0697714	701.167	17.6766
								677.516	2.06514	741.857	58.4156	838.217	0.746477	768.315	2.70922
								728.862	0.0702651	763.671	1.01048	844.52	1.39708	864.416	0.0277969
								810.845	2.6027	883.944	0.0846782	929.298	0.159432	895.948	0.708834
								882.039	0.214511	918.251	1.03437	1035.06	0.338979	1035.22	0.99533
								913.942	0.539816	1062.27	3.60501	1095.51	1.29461	1045.88	2.19933
								978.897	1.54106	1075.72	1.52906	1124.28	1.36888	1197.9	1.52842
								1070.45	0.169522	1248.09	3.79207	1377.31	1.40502	1276.28	51.676
								1150.01	1.7913	1322.72	8.8213	1414.65	3.89061	1361.46	9.04803
								1214.95	1.59472	1392.36	1.74616	1553.01	2.01824	1446.89	1.4782
								1407.27	3.97949	1503.85	2.52179	1513.85	0.370536	1517.53	4.80349
								1489.25	2.7271	1561.51	4.33853	1529.14	7.02716	1609.02	0.915352
								1616.64	2.75382	1638.12	397.602	1622.06	5.61171	1610.09	0.469518
								1552.75	0.348483	1656.88	0.521188	1792.17	0.0371254	1821.06	0.22436
								1617.91	2.30655	1849.95	0.30068	1863.89	0.359692	1815.39	2.60133
								1672.66	5.00224	1914.73	0.50927	1980.12	0.591026	1886.62	0.343568
								1826.4	0.0702435	1898.88	2.26578	1978.79	1.11584	1983.66	0.145463
								1908.69	0.372068	2019.16	0.149528	1986.4	2.86183	2014	0.397186
								2036.41	2.1797	2057.27	0.64499	2001.74	0.227776	2065.76	0.200281
								2038.47	1.62171	2124.22	0.0552799	2063.24	0.0202993	2072	0.0752219
								2093.63	0.289575	2146.07	0.126853	2099.04	0.0183	2104.33	0.0427258
								2091.87	0.338787	2163.68	0.0314578	2114.43	0.0351294	2150.88	0.0621339
								2138.65	0.0374595	2209.6	0.0567865	2197.99	0.0109967	2176.71	0.0108963
								2169.47	0.02715	2235.2	0.0175694	2261.04	0.0557832	2192.97	0.0240842
								2194.11	0.0653066	2269.28	0.0438134	2233.56	0.0152732	2229.22	0.0406134
								2308.38	0.0124818	2304.07	0.0507439	2353.94	0.67075	2319.21	0.0608732
								2352.33	0.0392679	2387.82	0.0490217	2415.89	0.167338	2373.32	0.23492
								2359.38	0.0322984	2440.34	0.201327	2479.42	0.472217	2516.46	0.484691
								2431.87	0.59828	2594.33	0.492695	2563.92	0.00723461	2574.34	0.25393
								2496.2	0.352167	2639.3	0.290781	2618.75	0.413332	2657.84	0.832256
								2587.08	0.596138	2750.17	1.0693	2658.85	0.165459	2692.24	0.780644
								2649.96	0.0140958	2784.98	0.91615	2689.05	0.442459	2764.52	1.06193
								2729.15	0.603537	2825.25	0.884085	2658.87	0.962964	2762.68	1.67662
								2758.17	0.413889	2852.77	1.71396	2632.75	0.0434302	2745.15	0.791891
								2790.91	0.493338	2865.77	2.04656	2751.9	0.232236	2763.47	2.06179
								2774.09	1.20639	2854.47	2.00449	2721.74	2.62805	2820.19	2.2088
								2756.71	0.336807	2912.03	4.15159	2758.23	0.318987	2845.55	0.448882
								2886.06	0.895115	2945.77	0.678474	2786.64	1.50827	2849.68	8.39548
								2856.09	0.804356	2946.78	4.63454	2812.82	1.58517	2834.12	0.234156
								2891.89	1.18215	3020.24	2.75172	2773.79	5.0076	2923.52	0.408419
								2915.54	2.63641	3021.39	2.1121	2798.62	1.45631	2909.4	1.49833
								2959.76	0.589145	2996.31	1.34654	2820.01	1.80521	2873.21	3.66906
								2897.98	5.2586	3002.65	0.524534	2807.07	0.678336	3250.54	2.17669
								2907.86	0.73051	3006.51	21.137	2815.65	1.20997	2943.76	3.98538
								2931.08	3.24228	3001.6	9.17686	2828.41	3.2334	2930.34	8.79303
								2909.53	0.273412	3016.25	4.92947	2868.92	10.4674	2946.4	3.8495
								2948.06	8.04519	3043.82	7.06661	3078.13	5.91451	3044.59	1.01651
								2924.35	4.32274	3141.31	1.40689	5646.06	0.0135896	5666.8	0.137167
								2987.1	0.576101	5752.01	0.0118193	5700.99	0.0166569	5634.96	0.0141445
								3180.22	6.10503	5774.48	0.00668071	5648	0.127989	5662.63	0.0142894
								5798.1	0.0136848	5797.56	0.123891	5695.23	0.0188061	5620.32	0.0449928
								5849.21	0.010224	5789.04	0.0260932	5640.56	0.321084	5656.65	0.273056
								5843.89	0.0539276	5782.95	0.246107	5661.97	0.124307	5711.21	0.0769892
								5801.51	0.016734	5832.1	0.0715206	5756.17	0.121262	5748.74	0.0836585
								5774.64	0.359186	5880.77	0.215723	5737.03	0.0687647	5792.05	0.110744
								5809.13	0.126588	5930.63	0.0395516	5734.75	0.204213	5793.11	0.229504
								5853.46	0.260706	5916.02	0.196745	5752.94	0.243252	5793.86	0.202197
								5880.77	0.21174	5930.4	0.205105	5750.17	0.187531	5823.1	0.164823
								5868.57	0.230471	5968.16	0.0245966	5777.16	0.14546	5784.86	0.361335
								5854.89	0.19132	5953.81	0.167931	5779.98	0.0262291	5824.49	0.0402549
								5896.97	0.221956	5941.98	0.321374	5769.45	0.105833	5817.14	0.199855
								5902.89	0.162295	5973.4	0.0936497	5757.23	0.206377	5832.47	0.124737
								5914.52	0.136352	5971.57	0.189881	5779.15	0.304206	5811.79	0.468644
								5918.27	0.120684	5992.01	0.445411	76.451	0.401774	40.074	0.245955
								5926.6	0.307877	9.73	0.104987	26.737	0.0987599	51.5	0.111753
								5942.28	0.193064	7.247	0.08041	84.945	0.135896	39.704	0.0883879
								154.062	0.206993	33.981	0.252386	51.489	0.0964556	35.528	0.0958015
								153.92	0.242901	46.191	6.10613	215.849	0.258546	62.666	0.218441
								109.891	0.425962	75.021	0.118051	14.478	0.270776	15.015	6.29621
								79.477	0.060545	107.61	0.100962	105.673	0.109161	71.03	1.44836
								92.921	0.0439125	30.439	1.6506	75.376	0.0962952	134.476	0.112398
								127.244	0.147654	134.365	0.28517	29.96	0.020694	22.017	4.09195
								161.549	0.121438	160.004	0.111921	175.178	0.246493	169.961	0.153773
								161.852	0.0990416	170.803	0.0356937	191.809	0.0407619	196.668	0.102307
								254.142	0.0568112	209.111	0.203305	196.81	0.18802	202.075	0.0353268
								214.788	0.278596	190.771	0.419674	230.8	0.0849728	215.863	0.347618
								217.206	0.0277518	230.059	0.16473	241.873	0.209857	238.74	0.0515636
								254.143	0.216795	265.646	0.846125	281.682	0.142886	252.625	0.0912321
								290.125	0.0756167	273.525	0.769361	285.697	0.116855	282.996	0.977904
								305.045	1.30909	316.372	0.312958	320.077	0.384021	294.849	0.0907503
								346.795	0.0416231	326.364	0.174282	360.8	0.788974	326.04	0.191928
								360.722	0.161974	387.031	0.0563815	388.173	0.14388	362.631	0.0375337
								385.37	0.589842	404.6	0.0925344	386.785	0.720265	407.33	0.0345139
								426.257	0.206393	479.036	0.0604261	433.699	0.0146971	423.476	0.139053
								460.475	0.213165	485.812	0.0273274	490.871	0.00703237	495.647	0.0453086
								476.575	0.701244	572.836	0.184792	519.583	0.00658917	501.129	0.0191308
								508.899	0.0360719	609.575	0.926467	526.859	0.093256	577.269	0.157509
								559.204	0.00313835	646.328	0.0653114	663.852	0.521037	615.889	1.18821
								597.379	0.0229967	700.361	1.21945	680.53	5.31707	660.313	0.0889151
								629.442	0.139985	726.664	0.11177	747.243	1.19878	702.471	1.15242
								727.235	0.2653	764.225	0.0261707	727.908	7.9678	736.367	0.0326892
								767.33	4.49393	775.069	0.00594434	735.754	4.58527	780.792	0.0400849
								829.168	0.0229474	874.324	0.0151843	785.201	0.010499	781.985	0.00151962
								797.648	2.23933	907.203	0.00703758	869.962	0.0286627	889.118	0.0311906
								833.93	4.15278	904.53	0.435403	905.174	0.0148805	894.576	0.39003
								860.017	0.0108588	959.488	0.385635	965.843	0.217126	923.154	0.0236307
								937.822	0.0278738	978.571	0.565812	964.316	0.336666	971.22	0.313756
								978.557	0.0551305	1010.8	0.0288263	967.594	0.293127	986.066	0.299988
								1041.36	0.076159	1022.24	0.0136933	974.967	0.105184	1011.63	0.0172157
								1047.13	0.52691	1030.8	0.0594668	1005.65	0.0878471	1015.32	0.0357317
								1073.18	0.0169381	1053.47	0.00277386	1026.05	0.0461089	1031.06	0.0570666
								1070.86	0.140871	1064.88	0.0469056	1030.32	0.0415632	1054.87	0.00517118
								1095.78	0.0348747	1084.24	0.0803382	1066.39	0.190612	1065.78	0.0523814
								1110.72	0.0600112	1100.17	0.0316301	1105.38	0.0553493	1076.52	0.0647978
								1121.62	0.0967061	1141.44	0.00473166	1081.84	0.201866	1093.72	0.0221063
								1179.09	0.0938058	1168.98	0.104463	1153.35	4.33516	1138.67	0.0323333
								1202.3	0.0224127	1246.44	0.0406161	1187.3	0.687928	1167.7	0.0872162
								1204.65	0.0697227	1271.29	0.0922309	1217.24	0.0478108	1238.82	0.0369287
								1241.94	1.046	1327.84	0.0828852	1263.37	0.0734065	1268.86	0.0175389
								1275.28	0.928775	1345.53	0.00530807	1289.29	0.0384862	1312.11	0.854163
								1322.5	0.0820115	1382.55	0.225613	1307.36	0.160236	1330.08	0.0676673
								1354.5	0.120811	1380.96	0.640843	1325.79	0.482062	1382.77	0.0780208
								1395.16	0.0294406	1384.82	0.728718	1309.78	0.167439	1364.3	0.636973
								1409.94	0.0813697	1396.39	0.0107676	1298.96	0.54721	1357.22	0.715806
								1428.18	0.432413	1406	0.922245	1354.8	0.0765997	1377.21	0.037866
								1417.46	0.073717	1420.51	1.74943	1335.31	0.0202891	1392.24	13.5076
								1410.66	0.147516	1430.45	1.1986	1357.15	5.02983	1403.33	0.975652
								1471.73	0.0331599	1427.73	2.08659	1371.42	0.049536	1407.35	5.21991
								1471.15	0.0012889	1446.52	0.0117363	1382.9	0.014911	1403.41	0.222054
								1474.52	1.0915	1446.9	0.0174185	1361.46	0.15344	1441.08	0.0713142
								1486.95	0.0620048	1445.2	0.0571198	1375.87	0.057024	1432.94	0.0504698
								1489.1	0.0434392	1450.04	0.0772709	1388.68	0.22761	1431.5	0.0722897
								1480.81	0.11604	1451.39	0.0286829	1380.44	0.186126	1435.07	0.145369
								1489.11	0.00936432	1456.45	0.116225	1386.54	0.0234272	1445.46	0.270477
								1495.37	0.104752	1466.08	2.42501	1392.44	0.356166	1443.17	0.0223319
								1488.86	0.116512	1523.58	8.65022	1416.88	0.0514923	1452.99	0.988031
								1502.3	0.0637716	2847.87	0.0287802	1517.3	16.27	1504.61	5.25123
								1497.52	0.377244	2854.18	0.0236538	2819.54	0.0696693	2833.5	0.02546
								1518.66	0.0222816	2873.88	0.0469375	2845.03	0.11918	2816.92	0.0606505
								1621.07	0.113233	2865.6	0.0238848	2820.14	0.0755885	2828.26	0.0266627
								2945.45	0.036134	2874.3	0.049	2833.36	0.0115252	2810.69	0.0442799
								2966.13	0.0150746	2879.02	0.000738054	2827.47	0.0667836	2838.17	0.0512838
								2959.13	0.0133554	2919.48	0.072918	2832.41	0.039175	2853.38	0.00230895
								2939.93	0.0864309	2934.83	0.00681649	2871.62	0.118333	2882.89	0.00486427
								2949.74	0.0440113	2933.3	0.0248132	2863.26	0.00674072	2894.74	0.0752878
								2963.02	0.00246437	2937.05	0.401241	2865.21	0.171565	2900.21	0.0291169
								2979.76	0.0781442	2953.13	5.5378	2882.45	0.101777	2906.69	0.0590665
								2987.81	0.0202398	2949.96	0.379322	2876.57	0.0229074	2912.9	0.683578
								2985.02	0.187852	2954.47	0.0662892	2887.23	0.251096	2905.09	0.0538508
								2980.33	0.0181579	2957.72	0.00430101	2880.64	0.0385283	2908.29	0.0352957
								3002.85	0.0733761	2970.66	0.190101	2889.65	0.0106085	2919.24	0.182789
								3003.39	1.02791	2990.88	0.0382931	2885.87	0.211932	2925.77	0.00505938
								3016.37	0.0425918	127.088	0.380011	2905.84	0.0956928	2933.84	0.0231887
								3010.66	0.0338969	102.349	1.61419	189.834	1.6791	184.911	2.37667
								3027.63	0.0456268	107.671	0.142	190.527	0.214968	163.745	0.749867
								3040.65	0.123458	135.983	0.0201601	168.725	0.106534	149.639	0.161499
								261.059	0.0178821	144.389	0.0289939	311.693	0.0030723	180.969	0.015452
								204.669	0.204852	166.994	0.0280527	145.281	0.0909809	132.638	0.053695
								189.263	0.170714	198.527	0.123217	232.303	1.77935	180.752	0.0737528
								195.852	0.127473	119.951	0.027591	213.934	0.233021	242.962	0.278004
								220.086	0.077632	226.599	0.0288678	148.95	0.20711	127.796	0.0410228
								258.86	0.081948	250.572	0.01737	295.054	0.00821503	276.317	0.0437714
								259.003	0.34718	262.977	0.00819445	312.082	0.0822174	301.03	0.0230202
								347.884	0.198929	300.828	0.117449	321.697	0.00612924	307.258	0.00952925
								308.61	0.0464212	288.43	0.268286	363.813	0.038319	321.85	0.0302408
								308.085	0.034016	321.223	0.409217	366.234	0.0216454	345.912	0.0316044
								348.306	0.113142	358.491	0.044968	408.285	0.0551432	360.038	0.340442
								392.957	0.653916	368.047	0.112064	407.867	0.579646	391.691	0.125338
								401.576	0.0248249	410.432	3.6911	444.581	0.0694323	404.166	0.121825
								445.882	0.0091716	421.436	0.214947	485.016	0.0612307	434.903	1.71481
								456.257	1.24958	481.148	0.0149236	514.712	0.643301	467.98	0.0661036
								481.473	0.068164	497.354	0.0907014	516.703	0.556658	515.972	0.0560301
								524.146	0.0955765	570.541	0.0801609	559.982	0.0369533	530.419	0.0730754
								560.006	0.17046	577.185	0.0270851	614.34	0.133991	601.618	0.0436693
								575.892	1.78487	662.693	0.0487258	643.131	0.145493	606.838	0.0375209
								607.824	0.0619136	700.823	0.0336464	653.989	0.183074	683.019	0.0463923
								654.484	0.144159	736.006	0.00502047	784.547	0.0250332	721.662	0.0548606
								693.661	0.178005	792.506	0.776455	803.937	0.802994	765.134	0.00340332
								724.635	0.191844	819.811	0.186522	880.24	0.92962	808.743	0.621441
								821.94	0.00716969	855.221	0.955721	849.328	2.44666	842.698	0.121025
								863.771	1.23095	866.356	0.0501035	861.204	0.520736	890.955	0.87407
								932.373	0.0934237	964.971	0.00237292	907.773	0.0805168	888.39	0.0923717
								892.584	0.11518	998.313	0.0735154	993.925	0.0220837	995.648	0.0157768
								930.92	1.06893	995.428	1.02769	1029.07	0.00604182	998.967	0.444706
								955.986	0.0637595	1050.46	0.0136051	1087.7	0.259271	1028.67	0.0460751
								1033.38	0.0161617	1069.32	0.190276	1086.39	0.550235	1077.22	0.0194491
								1074.66	0.00697789	1101.95	0.0329722	1090.82	0.19411	1091.67	0.0520025
								1138.24	0.0337591	1113.17	0.0220014	1098.25	0.199548	1117.48	0.109259
								1141.56	0.631581	1121.94	0.0341133	1130.24	0.0906114	1120.84	0.0617674
								1168.11	0.0029769	1144.52	0.0100628	1148.76	0.0537753	1137.65	0.148246
								1165.98	0.149363	1157.22	0.140121	1155.44	0.34279	1160.92	0.0377623
								1190.73	0.0290471	1175.36	0.0156231	1194.39	0.148008	1173.56	0.337754
								1206.75	0.0153831	1191.95	0.0236839	1228.38	0.4674	1182.05	0.00959419
								1218.69	0.083338	1233.49	0.0147322	1211.71	0.0275792	1199.07	0.0149842
								1275.12	0.0071734	1260.36	0.0747263	1275.83	0.35296	1244.24	0.11751
								1297.51	0.0591729	1338.21	0.240042	1307.83	0.0790545	1273.05	0.24268
								1300.4	0.0584258	1360.8	2.286	1340.11	0.841032	1344.45	0.661093
								1337.94	0.191516	1419.79	0.0670913	1385.39	6.46106	1375.84	7.46284
								1370.06	0.206995	1437.48	0.139023	1414.34	1.49532	1419.03	0.532659
								1417.8	0.297763	1473.6	0.36406	1435.65	0.210011	1438.47	0.434569
								1451.1	12.8898	1471.94	0.046533	1455.14	0.627377	1495.77	0.293777
								1491.23	0.232898	1475.7	0.138842	1430.59	0.0749621	1469.82	0.0369625
								1506.49	0.298807	1488.06	1.16717	1420.63	0.0233945	1462.09	0.173652
								1529.71	1.01405	1497.85	0.0609454	1479.32	0.464057	1483.22	4.9799
								1511.81	0.0614026	1511.66	0.626903	1463.63	0.0313583	1499.55	2.46039
								1505.15	0.00373552	1521.1	0.0722993	1479.34	0.159978	1508.82	0.785304
								1568.78	0.348208	1520.01	0.0015926	1491.82	48.3603	1514.03	0.0440013
								1566.38	0.16391	1538.45	0.019553	1508.78	0.0636939	1508.48	0.0537805
								1569.76	0.0567993	1537.07	0.0103429	1487.73	0.0472796	1547.51	0.174491
								1581.57	0.359107	1537.33	0.0132649	1499.95	0.221839	1538.1	0.224279
								1587.64	0.0774495	1540.9	0.0217501	1511.44	0.100038	1537.57	0.0061138
								1575.38	0.0550799	1542.66	0.0300786	1504.59	0.0192926	1540.13	0.0530659
								1585.37	0.0239229	1547.72	0.0718264	1506.94	0.119278	1551.61	0.0659596
								1591.53	0.0576177	1557.52	9.95224	1514.02	0.164571	1549.39	0.951399
								1584.02	0.0370165	1613.41	0.0403825	1538	0.0589681	1558.72	1.91356
								1598.62	0.0926695	2938.89	0.0175335	1640.85	0.0940778	1609.6	0.112352
								1592.42	0.145083	2944.39	0.00802124	2941.68	0.0383972	2938.86	0.00863537
								1612.38	0.0124842	2964.67	0.0205711	2969.36	0.0825169	2924.15	0.0626413
								1715.58	0.0637976	2956.85	0.0621849	2943.46	0.00833105	2932.77	0.00085023
								3042.89	0.254935	2964.65	0.126651	2955.1	0.051305	2917.05	0.0262247
								3060.88	0.00481759	2969.17	0.146767	2949.29	0.110098	2943.02	0.140851
								3054.27	0.0581723	3010.63	0.0529066	2952.57	3.10269	2957.51	0.157163
								3034.52	0.00588307	3025.26	0.00210899	2996.95	0.000153429	2988.21	0.00211978
								3045.08	0.193638	3024.17	0.0205552	2985.83	0.0114023	3001.86	0.0228117
								3057.72	1.18215	3028.09	0.0210501	2987.63	0.0132426	3005.62	0.0139298
								3076.43	0.211679	3043.09	0.00982164	3003.78	0.0416142	3011.82	0.00577143
								3082.63	0.000416019	3040.23	0.00522052	2998.3	0.0316944	3018.03	0.0522024
								3080.62	0.069412	3045.94	0.125743	3008.97	0.0769433	3011.68	1.15257
								3074.95	0.0166565	3048	0.0731332	3002.93	0.00539894	3012.63	0.0160524
								3096.87	0.0361992	3061.9	0.00609075	3007.27	0.0493939	3024.25	0.0142716
								3098.96	0.105496	3082.05	0.0191834	3011.27	0.0106533	3029.22	0.105503
								3111.44	0.00488114	142.018	0.68111	3027.64	0.014294	3039.91	0.0175707
								3105.24	0.094526	151.781	0.00589785	174.073	0.483389	170.17	0.896411
								3122.1	0.0155949	178.953	0.110269	151.95	0.0698718	156.898	0.0130335
								3136.49	0.0160615	181.278	0.0260938	292.501	0.0171444	187.628	0.127148
								208.597	0.230144	209.783	0.033541	131.087	0.0649429	137.626	0.0198765
								194.106	0.194027	243.85	0.351012	214.54	0.156048	186.484	0.0282279
								201.165	0.00558454	164.307	0.0495295	198.428	0.34807	249.47	0.322793
								224.696	0.0349303	267.492	0.0520236	128.085	0.241053	137.613	0.141224
								263.709	0.286725	291.111	0.0152522	277.227	0.022233	281.921	0.014339
								262.199	0.12192	303.799	0.0376674	292.164	0.0146484	306.434	0.0102546
								354.681	0.444135	343.155	0.033208	303.337	0.0159189	313.396	0.0491761
								312.651	0.0100077	329.507	2.34942	344.69	0.398785	327.41	2.466
								312.14	0.0238424	363.147	0.00807696	348.381	0.0127675	350.971	0.209447
								350.832	0.00838482	399.893	0.0409983	390.424	0.0603704	366.23	0.227455
								395.684	0.0527429	409.775	0.0217548	391.198	0.452065	396.319	0.00753399
								405.089	0.0133835	450.282	16.2592	427.694	0.127692	410.792	0.178338
								448.688	0.0524231	461.783	0.217615	467.46	0.0217321	440.509	3.34345
								459.47	0.353882	522.19	0.57702	496.66	0.22022	472.402	0.165642
								484.846	0.00911649	538.256	3.30085	498.858	0.852188	521.673	0.0356381
								526.463	0.0111726	611.924	0.0127307	542.105	0.394101	536.333	0.221383
								562.472	0.735211	618.24	0.0319882	595.734	0.198059	607.415	0.110596
								577.468	1.66741	704.789	0.503647	625.377	0.051699	612.477	0.0363501
								610.125	0.484977	741.405	0.0526955	637.77	0.0755538	688.778	0.527502
								656.924	0.286629	777.291	0.0381343	767.659	0.0199076	727.254	0.0264331
								696.195	0.162824	834.056	0.233143	786.48	11.0175	770.612	0.0353995
								728.303	0.386106	861.224	0.0758034	855.388	0.094489	814.704	0.455122
								824.906	0.00369069	897.702	0.119072	831.626	3.71485	848.386	0.405614
								866.439	15.3222	907.925	0.0533724	843.451	0.348323	894.458	0.154007
								930.781	0.0943913	1006.41	0.24835	889.136	0.141496	893.746	0.0251317
								895.568	0.0194323	1039.43	0.0286851	975.605	1.16145	1001.36	0.00618747
								932.953	0.0935366	1036.77	1.57533	1011.15	0.0704302	1004.47	1.44159
								957.624	0.12416	1091.79	0.316014	1069.51	0.0437298	1034.21	0.0550717
								1035.68	1.36487	1110.64	0.191113	1068.65	0.37468	1083.15	0.629213
								1077.24	0.106189	1143.3	0.356409	1073.34	0.523084	1097.82	0.0861072
								1140.85	0.04127	1154.1	0.0122125	1080.19	0.316691	1123.38	0.186115
								1144.49	0.12935	1163.33	0.0734891	1111.94	0.27127	1126.7	0.0843012
								1169.71	0.0497469	1186.06	0.0996391	1129.79	0.0810237	1143.72	0.211061
								1168.37	0.350143	1198.35	0.154276	1136.48	0.123219	1166.47	0.102047
								1192.37	0.0574947	1216.55	0.0121884	1176.93	0.0892496	1178.99	0.188822
								1208.43	0.0758855	1233.26	0.01732	1209.76	0.318521	1188.12	0.0283383
								1220.12	0.0708934	1274.62	0.180895	1194.31	0.0175749	1205.16	0.0157419
								1276.62	0.00237144	1301.56	0.353469	1257.2	0.174211	1250.05	0.21158
								1298.69	0.219516	1380.19	0.338009	1288.88	0.135446	1278.49	0.277163
								1301.79	0.0416273	1404.28	2.19146	1321.03	0.539221	1350.5	1.05149
								1339.5	0.285135	1461.09	2.03065	1364.97	3.79679	1381.4	0.479685
								1372.38	0.0212029	1479.11	0.954404	1392.94	2.49693	1424.21	0.930501
								1418.51	0.464787	1516.76	0.641514	1413.79	0.0228177	1441.95	0.568799
								1451.54	47.9488	1513.25	0.0172996	1430.81	0.459981	1497.42	0.120265
								1492.05	4.27949	1517.19	0.191078	1412.73	0.0729085	1475.87	5.13702
								1506.36	0.150424	1529.12	0.855091	1402.79	0.398721	1469.01	0.408655
								1529.42	0.482904	1539.27	0.0728917	1458.02	1.6128	1488.56	6.10177
								1513.82	0.309993	1553.32	0.064677	1445.95	0.072245	1503.83	0.0939761
								1506.89	0.0696745	1562.65	0.0189769	1460.07	0.0998478	1514.41	0.125159
								1568.46	17.4741	1561.28	0.714975	1473.82	0.240104	1519.31	0.430415
								1567.85	0.0617413	1579.81	0.372948	1489.67	0.184339	1514.72	0.0507914
								1570.87	0.0645009	1578.22	0.392834	1470.41	0.023329	1552.63	0.292751
								1582.23	0.109401	1578.05	0.00893901	1481.62	0.0100214	1543.81	0.0179483
								1588.99	0.0646364	1581.87	0.00379885	1492.75	0.0278196	1544	0.0107621
								1577.19	0.0184891	1584.24	0.057589	1487.05	0.0309646	1546.14	0.00664575
								1585.89	0.071279	1589.16	55.409	1489.01	0.050191	1557.01	0.0275031
								1592.92	0.136576	1598.91	114.312	1495.24	0.124893	1554.85	5.06501
								1585.27	0.0348893	1654.67	0.384996	1518.51	0.656197	1564.38	0.0472005
								1599.85	0.0519996	2982.15	0.135502	1624.11	1.09597	1615.67	0.134232
								1594.2	0.160523	2986.07	0.0311344	2923.68	0.0469424	2944.67	0.00440505
								1613.36	0.652033	3005.41	0.0176691	2951.45	0.0543458	2929.6	0.0263079
								1718.77	1.28913	2997.51	0.0374109	2925.68	0.0120016	2939.25	0.023111
								3046.61	1.15613	3006.13	0.0979876	2938.36	1.63842	2922.99	0.0378612
								3063.57	0.124329	3010.07	1.16361	2933.07	0.632333	2949.62	1.06756
								3057.5	32.6113	3053.43	0.0331412	2935.56	6.6623	2965.6	17.9244
								3036.98	25.5001	3066.75	0.000930568	2976.4	0.0196287	2994.35	0.000868118
								3049.34	0.179921	3065.6	0.0119954	2968.55	0.0008318	3006.05	0.0366271
								3060.86	3.78987	3068.84	0.0123661	2969.25	0.0110546	3011.33	0.00376576
								3079.27	0.0198567	3084.69	0.000339605	2985.67	0.0254672	3017.94	0.0177533
								3085.61	0.00701907	3081.41	0.00616603	2980.76	0.0386941	3023.95	0.0540014
								3082.4	0.00182984	3086.56	0.0599435	2991.5	0.070405	3017.51	0.0860244
								3078.32	0.0393356	3088.95	0.15282	2985.86	0.000538287	3019.13	0.000949749
								3099.26	0.0117019	3102.61	0.0135307	2991.83	0.0132384	3030.42	0.00858563
								3100.22	0.0265329	3122.88	0.00868445	2993.97	0.0183502	3036.43	0.0505588
								3114.58	0.00419577	129.734	0.107655	3009.67	0.00996612	3045.99	0.0200213
								3108.93	0.0707676	153.495	0.23658	166.68	0.999922	142.341	0.0824511
								3124.52	0.00608975	164.051	0.0768445	307.928	0.209596	173.789	0.238073
								3139.11	0.0093525	187.442	0.0195411	150.632	0.45315	128.493	0.114106
								157.488	0.243167	218.105	0.139932	225.424	0.20639	173.743	0.0382463
								162.785	0.589792	141.499	0.0598061	211.403	0.421685	231.606	0.0933202
								189.117	0.557762	247.47	0.384866	143.352	0.174698	123.178	0.0468284
								222.588	0.11053	272.163	0.00318096	292.783	0.0294929	268.348	3.65716
								225.178	0.212902	284.261	0.04501	307.114	0.0539744	294.066	0.00343839
								318.716	0.143406	320.838	0.15953	319.315	0.0990531	300.169	0.308901
								277.907	0.0710593	307.182	34.1291	356.428	0.0957335	316.53	3.91014
								277.025	0.000711978	343.534	6.13539	364.989	1.80057	336.169	0.205975
								316.737	0.0284576	379.942	0.0297177	403.611	0.240412	351.89	32.1597
								357.067	0.0701591	389.257	0.165096	407.316	0.789358	383.942	0.155745
								370.04	5.54523	432.418	24.2982	443.777	0.606106	395.88	0.0166843
								412.058	0.0100758	442.059	0.232507	484.435	0.378902	427.879	11.2903
								424.847	1.36106	500.375	0.133579	512.368	0.396307	460.532	0.0775217
								451.777	0.257644	518.987	0.632346	514.305	0.123688	508.113	0.095423
								491.622	32.7702	590.48	0.0922795	557.123	0.101066	524.561	0.457882
								527.216	0.475387	597.935	0.433128	610.812	0.136561	594.193	0.0558979
								543.151	0.442018	684.643	0.196279	640.388	0.209657	599.55	0.250497
								575.407	0.123797	721.94	0.733972	653.266	0.736073	675.135	0.0326808
								620.604	0.660982	757.504	10.9022	782.688	0.0251921	715.286	2.21082
								660.834	0.20782	813.165	0.56194	801.538	8.78782	758.492	0.790405
								693.652	0.228776	840.495	0.0351536	865.316	0.00102912	801.219	0.388797
								790.203	0.00554172	875.475	0.0603681	847.058	2.07944	834.903	0.0186351
								831.514	4.91719	887.145	0.0328869	859.094	0.300646	878.145	0.00475409
								889.833	0.0034604	985.529	0.0959124	903.871	0.16475	880.531	0.0320241
								860.292	0.0203079	1018.84	0.163185	989.898	0.111209	987.499	0.0243162
								897.775	0.514023	1016.24	3.34124	1026.38	6.99576	991.551	6.23147
								922.802	0.0574024	1071.38	0.470365	1084.52	0.117987	1021.24	0.23189
								1000.2	0.0462098	1089.9	0.182895	1083.71	0.576895	1069.86	0.343607
								1042.11	0.00549471	1122.61	0.0063509	1088.01	0.947377	1085.04	0.119137
								1105.33	0.0177807	1134.24	0.0267347	1094.81	0.26526	1109.89	0.00749183
								1108.78	1.11026	1142.44	0.00175494	1126.61	0.00508694	1113.57	0.0184931
								1134.5	0.00469104	1165.21	0.0111538	1144.38	0.0263466	1129.87	0.00821298
								1132.73	0.589076	1177.88	0.0689259	1151.41	0.176496	1152.89	0.00940473
								1156.91	0.0125715	1196.6	0.0209376	1192.59	0.0791586	1165.68	0.0588619
								1172.34	0.0211652	1213.15	0.0284663	1224.89	0.0940957	1176.14	0.0269918
								1184.17	0.0832957	1254.2	0.0162353	1209.61	0.0264968	1192.66	0.0250205
								1242.86	0.160377	1281.17	0.00578498	1272.15	0.121564	1236.9	0.0223223
								1263.44	0.016283	1358.8	0.0250875	1303.5	0.0743244	1264.69	0.00545585
								1267.7	0.0251161	1382.44	0.00929712	1335.52	1.60932	1336.37	0.030422
								1303.57	0.0664698	1439.73	0.924026	1379.28	0.0012006	1366.9	0.00991584
								1337.05	0.177398	1456.65	0.0789663	1406.48	0.123513	1409.85	0.526972
								1382.01	0.103918	1492.39	0.00400512	1425.56	1.17456	1427.32	0.0376435
								1414.02	0.00311363	1492.86	0.176633	1441.72	0.231584	1478.1	0.00658957
								1454.77	0.0217985	1496.74	0.0764778	1427.82	0.134779	1462.43	0.0982086
								1469.53	0.232448	1509.25	0.267644	1417.93	0.0441738	1455.89	0.144017
								1488.66	0.0252852	1518.59	0.105911	1472.53	0.0396702	1476.69	0.740569
								1478.63	8.42314	1532.62	0.0300182	1461.44	0.0768472	1489.77	0.0555496
								1472.45	0.0781271	1542.59	0.0387808	1475.15	0.0407452	1501.42	0.0687219
								1532.26	0.0471687	1540.6	0.0498608	1489.56	0.0281781	1505.64	0.0705766
								1535.4	0.131668	1559.17	0.00227512	1503.87	0.0084703	1502.32	0.0434808
								1535.5	0.037737	1557.87	0.00215845	1485.46	0.0900214	1538.66	0.000963555
								1546.75	0.0071252	1558.34	0.040775	1496.96	0.00601305	1530.45	0.00414758
								1551.92	0.0031956	1561.55	2.46492	1507.6	0.015306	1531.54	0.0714193
								1542.38	0.127586	1563.42	0.00226737	1502.4	0.0235465	1533.22	2.42692
								1550.94	0.0128084	1568.33	0.0328273	1504.19	0.0472711	1543.14	0.00209784
								1557.08	0.00886458	1578.17	0.116032	1510.3	0.00396966	1541.19	0.033326
								1551.04	0.0884676	1634.26	0.137348	1533.99	0.216717	1551.42	0.0978844
								1563.76	0.0193029	2958.66	0.00459108	1638.72	0.237358	1602.56	0.0816399
								1558.85	0.0118345	2965.45	0.00764215	2939.86	3.32951	2931.89	0.000483331
								1577.81	0.0171558	2985.08	0.000338428	2963.23	0.00656578	2914.67	0.0171475
								1682.64	0.0948178	2977.61	0.0476309	2940.92	0.0145232	2926.26	0.0306874
								3006.95	0.301167	2985.99	0.0161035	2952.83	0.193499	2910.32	0.0413014
								3028.58	0.0025166	2990.59	0.726489	2946.33	8.74076	2936.42	0.0455881
								3022.07	0.477529	3030.48	0.00532973	2951.61	12.1895	2951.64	0.108687
								3002.64	1.27478	3046.07	0.000940932	2989.65	0.00232914	2981.31	0.000409443
								3012.46	0.09731	3045.06	0.0248489	2983.35	0.000815878	2992.55	0.0040302
								3025.77	0.0103621	3048.53	0.00502309	2984.51	0.00298589	2998.64	0.000490585
								3041.13	0.00325256	3063.94	0.00647598	3001.52	0.131115	3005.02	0.0225751
								3050.3	0.00191153	3061.46	0.000145413	2995.68	0.0237473	3010.88	0.00644257
								3048.27	0.00266432	3066.83	0.1397	3004.87	0.00442474	3005.14	0.128011
								3043.12	0.00973137	3069.3	0.00358708	3000.66	0.00428327	3006.05	0.0057804
								3064.82	0.164671	3082.44	0.00087507	3007.47	0.000472247	3017.55	0.000594043
								3064.93	0.00136593	3102.69	0.0134022	3009.26	0.00536993	3024.33	0.00344437
								3079.58	0.00158779	164.527	0.20993	3024.97	0.0122789	3033.04	0.0175857
								3072.75	0.00772483	168.557	0.0499268	289.253	0.0879095	159.755	0.175344
								3089.42	0.038841	194.322	0.275738	125.652	0.443349	107.179	0.167158
								3104.22	0.00151672	228.007	0.0960164	204.457	0.0488645	157.055	0.0279211
								148.535	0.0195843	150.796	0.0338356	189.464	0.0649625	221.509	0.155646
								170.407	0.0341072	256.334	0.0192827	124.01	0.0444386	111.427	0.0908188
								207.866	0.0393424	281.311	0.0763911	271.78	0.0653113	257.591	0.0172283
								209.337	0.526177	293.094	0.0379236	286.758	0.0902335	284.032	0.154026
								301.04	0.14177	330.585	0.0310001	298.506	0.151528	289.272	0.0333164
								262.467	0.0369352	316.727	0.0655184	337.32	0.050352	303.543	0.0825285
								262.786	0.020569	352.571	0.338874	345.428	14.354	326.07	0.00282746
								301.673	0.141444	389.414	0.0879784	385.026	0.673923	341.193	0.326695
								343.947	1.08764	398.525	0.0288915	386.384	0.675987	372.589	0.0291756
								356.821	24.5168	440.293	0.963704	422.024	0.145234	385.679	0.574499
								398.176	0.487609	451.24	3.1061	463.497	52.645	416.455	0.090349
								409.501	0.511599	510.754	0.109465	490.573	0.349353	449.856	0.581082
								435.05	4.96711	528.069	0.091082	494.299	0.363225	497.667	0.061226
								475.961	4.54417	600.301	2.20572	536.266	0.0675801	513.711	0.12583
								512.178	0.321231	606.989	0.164668	590.573	0.200407	582.754	12.104
								527.634	0.180731	693.828	2.34436	619.598	0.0795914	588.437	0.270228
								560.29	0.0489291	730.534	4.16481	632.734	1.34647	665.14	43.0963
								606.841	0.335141	766.112	0.589174	762.678	0.0683551	703.697	35.8186
								646.299	0.0357017	822.774	0.332782	781.28	4.58075	747.793	6.87319
								678.083	3.46794	849.181	0.0361137	845.526	0.0355613	791.585	0.0335731
								775.199	0.087248	885.412	0.0241693	825.333	0.709382	823.747	0.00981674
								816.778	4.74007	894.725	0.166762	838.862	0.213688	868.347	0.0645528
								875.275	0.011027	994.54	0.0496122	883.002	0.0315773	867.232	0.127299
								844.128	0.0396394	1028.01	0.0401224	969.376	0.230306	976.712	0.0519301
								882.975	0.302661	1026.16	0.924336	1005.82	1.30849	981.256	0.667528
								906.903	0.0158491	1080.23	0.04102	1064.51	0.0249781	1010.28	0.179992
								985.187	0.354017	1099.12	0.0393806	1063.12	0.228949	1058.71	0.0069123
								1026.53	112.988	1131.19	0.193805	1067.7	0.121329	1073.4	0.0671354
								1090.58	0.0553929	1143.54	0.0311052	1074.54	0.159903	1098.84	0.105875
								1094.29	0.382242	1151.81	0.0951753	1106.54	0.0721219	1102.91	0.127369
								1119.67	0.0290921	1174.5	0.0641713	1123.82	0.367686	1119.27	0.0359676
								1118.46	0.166071	1187.14	0.0949101	1130.98	0.0626518	1142.1	0.129804
								1142.07	0.0464019	1205.31	0.00159472	1172.77	0.0541952	1154.86	0.11201
								1157.62	0.0352561	1222.19	0.00736774	1204.23	0.514858	1163.84	0.00266895
								1169.34	0.0543174	1263.4	0.630715	1190.02	0.0203831	1181.5	0.000967521
								1227.56	0.016138	1290.1	0.0264163	1251.82	0.0642959	1225.82	0.637739
								1248.39	0.312348	1367.83	1.71716	1282.91	0.0605088	1253.69	0.0389784
								1252.81	0.0232299	1391.95	0.28481	1314.57	0.76356	1325.36	1.31679
								1288.65	0.0489925	1448.48	0.546245	1358.45	0.251834	1356.38	0.27009
								1322.01	0.0725629	1466.04	7.80633	1385.56	0.144397	1398.44	0.799257
								1367.42	49.0917	1502.39	0.0464411	1405.33	0.306986	1416.2	0.165766
								1399.37	0.0734325	1501.79	2.92422	1421.39	0.0355004	1468.81	0.0265043
								1439.62	0.328132	1505.05	2.35712	1407.28	0.15281	1451.33	0.881769
								1454.33	1.60899	1517.77	0.049811	1396.41	1.18647	1443.15	4.02562
								1473.49	11.3777	1527.27	0.0418486	1452.14	0.0361136	1464.63	0.0983651
								1463.48	1.48915	1542.1	2.22383	1441.52	0.0677533	1479.23	0.0945938
								1456	8.20268	1551.64	0.00387946	1454.76	0.158265	1490.49	0.515692
								1517.34	0.131333	1549.81	2.69136	1468.77	0.124986	1494.92	1.26475
								1518.78	0.0268126	1568.4	0.0122169	1483.41	0.00270346	1491.42	0.00505405
								1520.5	0.160819	1567.13	0.00890344	1465.99	0.0560936	1528.13	6.53524
								1531.81	0.0271271	1566.58	0.0165049	1476.22	0.017162	1519.87	0.0157442
								1537.11	0.00180235	1570.51	7.37849	1487.08	0.0299472	1519.11	14.7185
								1527.94	0.0269733	1572.53	3.69389	1482.42	0.0786559	1521.76	40.1553
								1536.79	0.0092489	1577.35	3.21747	1483.58	0.0150528	1532.72	12.1184
								1542.15	0.0100484	1587.38	4.06329	1489.82	0.0132627	1530.11	2.94038
								1536.49	0.0541081	1642.96	0.404937	1513.08	2.06355	1540.05	4.2581
								1549.01	0.0140552	2968.04	0.0292497	1618.66	0.693576	1591.32	0.160274
								1543.64	0.00523624	2973.71	0.331383	2918.9	0.264972	2920.47	13.9411
								1562.45	11.3468	2994.49	0.283426	2943.31	0.0104445	2904.28	0.017363
								1668.24	0.970719	2986.13	1.31138	2921.03	0.0217859	2913.8	0.0879555
								2992.33	0.0151442	2995.74	1.33025	2932.48	2.41407	2898.54	0.0733559
								3013.08	0.0610277	3000.75	5.92652	2927.26	1.63089	2926.19	9.36721
								3007.15	0.014533	3039.78	0.00524941	2932.21	0.219266	2941.74	2.38181
								2987.34	0.0270363	3055.3	0.00247467	2969.74	0.00551979	2970.04	0.00305134
								2998.75	0.354902	3052.87	0.0384325	2963.25	0.00273771	2982.13	0.00656572
								3011.7	0.0405963	3057.9	0.0144005	2964.62	0.00836423	2988.36	0.0190801
								3026.41	0.00438692	3072.45	0.0344925	2980.92	0.0360827	2993.16	0.0294343
								3035.93	0.000199921	3070.39	0.00651896	2974.91	0.0218986	2999.83	0.000637262
								3033.73	0.0115658	3075.36	0.00512907	2984.82	0.00583569	2992.93	0.00513101
								3026.54	0.0380366	3078.04	0.0122841	2979.33	0.0180411	2993.46	0.0564527
								3049.7	0.0154222	3091.61	0.011506	2986.99	0.00566021	3006.89	0.00724898
								3050.14	0.0122538	3111.72	0.0109311	2989.02	0.0353294	3013.22	0.00998382
								3064.43	0.0160979	197.811	0.0809349	3004.77	0.0234084	3021.86	0.00907272
								3058.05	0.0016404	223.582	1.0371	268.802	0.0201368	140.314	0.260558
								3075.05	0.0237273	255.391	0.203999	344.45	0.0306402	189.897	0.2354
								3089.46	0.0747302	175.114	0.267793	329.641	0.037287	251.535	0.169693
								175.247	0.296039	284.034	0.239533	263.005	0.0111557	139.732	0.221596
								215.54	0.0319435	309.045	0.0381576	413.849	2.24628	288.445	0.0902762
								216.505	0.128486	321.85	7.70151	424.81	0.00688239	314.559	0.0308311
								309.789	0.0790549	358.041	0.0203169	436.271	0.225971	320.68	1.06723
								267.749	0.0242413	346.25	0.995782	474.867	0.00134216	334.719	0.865287
								270.035	0.00210775	380.249	0.330022	482.922	0.50564	356.458	0.0736324
								310.147	0.00351029	416.307	0.177773	522.008	0.0707374	372.908	0.440993
								349.685	0.0370963	425.998	16.9666	524.895	0.17094	403.645	1.74478
								363.298	0.0178806	468.068	0.32481	561.478	0.00701607	417.076	0.116977
								405.535	0.00168967	479.031	0.492784	601.205	0.073406	447.171	0.332605
								418.516	0.141724	539.145	0.224408	629.413	0.516834	480.711	0.381313
								443.041	0.00401793	556.222	0.130738	631.812	0.0103888	528.928	0.215041
								483.122	0.0359444	628.434	0.486958	675.294	0.0246966	545.007	0.215121
								519.21	0.0161019	634.74	0.0741914	728.145	0.00227504	614.548	0.411661
								536.027	0.0238612	721.511	1.45212	758.871	0.0961268	619.435	0.0707779
								567.973	0.00337787	758.641	0.0305467	771.259	0.0246175	696.055	0.661654
								613.859	0.0247472	793.766	1.00826	900.134	0.00215484	735.118	1.1957
								653.538	0.065925	850.333	0.0374951	918.419	4.62813	778.102	0.42938
								685.822	0.0665218	877.379	0.0815031	982.618	0.000395847	821.724	0.0277773
								782.71	0.00182026	912.506	0.0311102	964.598	0.00052591	855.193	0.129001
								824.165	2.29422	924.125	0.0850641	975.907	0.159437	898.287	0.0401424
								881.801	0.00066799	1022.47	0.0967672	1022	0.0136889	899.913	0.987245
								852.309	0.0149778	1056.2	0.306953	1107.44	0.000120787	1008.2	0.109707
								890.563	0.314051	1053.97	0.333199	1143.8	0.000221339	1012.31	0.67982
								914.878	0.0399265	1107.98	0.922721	1201.45	0.0140571	1041.64	0.972113
								992.978	0.00157064	1127.2	0.274847	1199.23	0.145752	1089.91	0.29719
								1034.45	2.52136	1159.1	0.125372	1202.63	0.927544	1104.8	0.373411
								1097.92	0.00289893	1171.22	0.0693827	1212.22	0.149265	1129.81	0.0887465
								1100.25	1.00898	1179.55	0.0800869	1243.55	9.7397e-05	1133.69	0.0921377
								1126.8	0.0101014	1202.24	0.0373721	1261.61	0.253712	1150.15	0.111353
								1125.42	0.155071	1215.18	2.11205	1268.79	0.00278167	1173.03	0.113259
								1149.54	0.0245003	1233.41	0.00305175	1315.87	1.70598	1185.83	1.9647
								1164.51	0.00170808	1250.29	0.00371684	1342.19	0.00203386	1195.14	0.00288305
								1176.66	0.000935765	1291.29	15.8354	1328.68	0.236803	1212.51	0.00870301
								1234.53	7.43573	1318.32	0.0249083	1389.03	0.0375815	1256.84	5.21751
								1255.94	0.0508608	1396.31	0.814341	1420.36	0.00341671	1285.23	0.0263482
								1260.74	0.0850338	1419.97	1.21462	1452.85	0.00194208	1357.16	1.0592
								1296.41	0.00887221	1476.87	0.190958	1496.09	0.00417755	1387.29	0.753442
								1329.47	0.0724652	1493.94	5.181	1523.65	0.000338654	1430.21	0.70826
								1374.63	0.436827	1529.81	0.408608	1542.55	0.00130685	1447.75	2.88757
								1406.43	0.0942508	1530.51	2.27055	1558.98	0.00219197	1499.09	1.77539
								1447.03	1.19485	1534.19	0.0141267	1544.76	0.137898	1483.46	6.22867
								1461.79	0.672326	1545.71	0.0170165	1535.56	0.00012842	1475.48	0.0132349
								1480.74	0.00845897	1555.56	8.46872	1589.79	0.00373226	1495.7	0.0387513
								1470.91	0.0112405	1570.21	302.945	1578.55	0.195758	1510.37	0.0348585
								1464.66	0.00625202	1579.82	0.0103389	1592.58	0.00292202	1521.23	229.931
								1524.62	0.176219	1577.8	0.0512092	1606.69	7.5607e-05	1525.73	0.0442583
								1527.09	0.165585	1596.54	0.349244	1620.92	0.0019189	1522.46	0.0415259
								1527.97	0.010085	1595.42	0.0721128	1611.4	1.6117	1559.02	0.593645
								1539.01	0.0136829	1594.68	0.0103053	1614.34	0.00105756	1550.99	0.0141848
								1544.16	0.00066389	1599	1.05413	1624.84	0.0210371	1550.09	0.443396
								1532.62	0.986278	1600.28	0.374026	1627.02	1.18166	1553.22	3.05805
								1543.39	0.0189053	1605.11	0.64298	1622.59	0.176868	1563.28	0.964648
								1549.46	0.00971685	1614.65	0.551398	1627.73	0.0106982	1561.19	0.525843
								1539.16	0.848475	1670.79	0.576289	1651.28	1.76056	1570.5	0.278583
								1556.01	0.0401741	2995.64	0.600631	1756.9	0.227409	1623.27	0.733281
								1551.06	0.0409793	3002.57	0.179219	3059.75	1.06668	2952.76	0.156319
								1569.86	0.0291912	3024.03	0.108324	3080.95	0.0126593	2934.99	0.717677
								1676.35	0.0332732	3014.15	0.0235987	3058.74	0.00436183	2946.23	0.136014
								2999.55	0.00131365	3023.1	0.104479	3070.86	0.000114738	2929.43	0.0578422
								3021.16	0.0305041	3027.83	0.00960829	3064.42	0.00708804	2956.59	0.0935275
								3014.53	0.155659	3067.58	0.00536647	3069.81	0.00174484	2971.95	0.00321549
								2994.93	0.0458818	3083.9	0.010673	3107.49	0.000826189	3001.54	0.00881558
								3005.07	0.0527766	3081.55	0.0156845	3101.25	0.000148938	3013.05	0.0193076
								3018.66	0.00678969	3086.2	0.0846746	3102.29	0.00126873	3019.11	0.100285
								3033.71	1.43338e-05	3101.24	0.0317427	3124.51	0.465781	3025.04	0.010175
								3043.36	0.00298993	3098.44	0.00981455	3113.83	0.000599057	3031.4	0.031167
								3041.09	0.0135945	3103.16	0.00549664	3122.82	0.00114879	3023.9	0.0124035
								3034.93	0.0109796	3106.61	0.0297573	3118.54	0.000682839	3025.82	0.0245091
								3057.8	0.432148	3119.62	0.107642	3125.03	0.000110375	3037.7	0.0821934
								3057.78	0.000749208	3139.54	0.00819817	3127.05	0.0118075	3044.31	0.016335
								3072.04	0.0129853	230.396	0.185747	3140.16	1.23732	3052.47	0.0321567
								3065.4	0.000416886	258.782	0.00466983	189.419	0.682662	117.872	0.61355
								3081.47	0.90701	171.229	0.0426868	170.857	9.42559	200.202	0.0476435
								3096.63	0.00203886	287.156	0.0639349	95.808	0.81841	76.126	0.327955
								240.019	0.165268	312.313	0.012606	255.196	0.0601489	236.811	0.04227
								238.424	0.281406	324.44	0.0106888	270.663	0.0327638	262.954	0.0764129
								333.248	0.810641	361.632	0.0225621	282.876	1.15899	269.366	0.0130994
								291.95	0.119608	348.978	17.2547	320.706	0.0742214	282.564	0.0222037
								293.418	0.00452267	384.428	0.435197	329.735	0.218553	305.343	0.0214177
								333.192	0.522166	420.966	0.016884	368.588	0.359244	321.662	0.410687
								373.376	0.039985	429.656	0.157717	371.635	0.231478	353.348	0.132516
								387.188	0.857661	472.197	0.0690167	407.566	0.345896	365.947	0.040846
								429.135	0.178808	482.856	0.0230722	447.847	0.107023	396.487	0.0495964
								441.68	0.443867	542.42	0.0276374	475.304	0.504954	429.774	0.0241069
								466.305	0.27843	560.472	0.0617071	479.401	0.0132489	477.739	0.0611879
								507.738	0.625614	631.699	0.121268	521.572	0.145486	494.148	0.0565065
								542.971	0.759274	638.849	0.0808595	574.876	0.0393222	563.185	0.228065
								559.231	5.33802	725.109	0.118844	605.256	0.0291999	568.88	0.0538341
								591.279	0.121005	761.95	58.9158	617.753	11.0264	644.94	0.318039
								637.362	0.0976371	797.442	0.123729	747.523	1.47861	683.393	151.124
								677.279	0.137596	853.651	0.0495655	766.043	0.243346	726.92	4.83214
								709.198	0.404237	881.431	0.0169354	829.545	0.0251437	770.505	0.0527282
								805.928	0.828247	916.085	0.0256075	808.821	0.0668082	804.797	0.0617321
								847.305	0.0284143	928.023	0.0276853	823.919	0.0098926	848.322	0.00601916
								905.827	0.0103146	1026.15	2.00311	867.735	0.0333628	849.244	0.0175523
								874.834	0.0263223	1059.85	0.29047	953.824	0.0128206	956.563	0.578025
								913.758	0.0575194	1055.51	0.897063	990.819	0.251969	959.931	1.4186
								937.991	0.0978916	1111.44	0.011232	1049.28	0.128143	991.173	11.3899
								1016.07	0.00546099	1131.02	0.0427042	1047.15	0.0136481	1038.92	0.0966204
								1057.52	41.6748	1163.11	0.0388571	1052.35	0.20065	1053.52	0.00382686
								1121.45	0.00502602	1174.69	0.0435053	1059.08	0.0356648	1078.91	0.047041
								1124.97	0.670307	1183.03	0.043428	1090.31	0.0737119	1082.75	0.0905463
								1150.32	0.13023	1206.07	0.00130286	1108.06	0.0464059	1098.84	0.154077
								1148.73	0.126972	1218.77	0.00733543	1115.64	0.0790172	1121.86	0.00489629
								1173.44	0.0460054	1237.22	0.0625707	1157.92	0.00173172	1135.1	0.0361945
								1188.2	0.0166584	1253.04	0.0178367	1188.71	0.526536	1141.93	0.0307304
								1200.19	0.0318579	1295.09	0.740055	1175.13	0.0084662	1159.6	0.0891595
								1258.95	1.41752	1322.03	0.00715897	1236.6	0.0328295	1206.22	1.23289
								1279.37	0.75643	1399.54	0.316278	1267.76	0.115947	1234.24	0.0168713
								1283.92	0.0183137	1423.53	0.0543248	1299.03	0.892192	1305.95	0.755083
								1319.76	0.112495	1480.65	2.61234	1342.52	7.79952	1336.77	0.0406165
								1352.78	0.11702	1497.47	0.168475	1369.63	9.68259	1379.37	2.89362
								1398.08	1.47896	1533.88	0.0330645	1389.87	11.3573	1395.91	4.99477
								1430.26	0.546557	1533.41	0.00853805	1405.76	0.920531	1447.48	0.00233335
								1470.81	1.73472	1537.36	0.0619423	1393.01	0.477749	1431.56	0.0553688
								1485.47	1.00108	1549.54	0.674538	1380.52	0.317225	1425.21	0.0364967
								1504.75	0.0852346	1559.54	0.0181225	1436.77	0.0977142	1443.34	0.105302
								1494.67	0.084061	1572.46	52.7909	1426.63	0.0226405	1458.52	139.93
								1487.4	0.0483228	1585.39	0.899189	1439.33	0.0356122	1471.52	207.399
								1548.39	0.10203	1579.54	0.372294	1452.81	0.0770429	1473.1	1.08357
								1549.53	0.0248605	1599.65	0.000764284	1468.31	0.0158526	1466.64	0.744777
								1551.54	0.0174414	1599.71	0.00448852	1451.11	0.0177541	1507.8	0.112513
								1562.82	0.0372943	1594.47	0.353379	1461.01	0.12145	1500.88	0.227817
								1567.46	0.00605194	1602.38	0.0209241	1471.06	0.0376419	1495.79	0.1687
								1558.8	0.156755	1603.72	0.112147	1467.43	0.00759513	1501.74	0.1916
								1567.14	0.0192558	1608.95	0.0463092	1467.48	0.111295	1513.17	0.192575
								1572.99	0.00521687	1621.45	0.216486	1473.77	0.939786	1510.41	0.0698862
								1566.59	0.172048	1672.73	0.380485	1496.63	273.7	1521.94	0.203419
								1579.69	2.35626	2998.55	0.131862	1603.84	0.901177	1570.23	0.533345
								1574.46	0.0306412	3006.13	0.0528566	2903.63	0.112297	2901.8	0.075857
								1593.26	30.8386	3026.2	0.100736	2928.24	0.0300364	2883.26	0.0683977
								1699.07	0.736326	3020.72	1.17247	2906.11	0.168871	2894.81	0.0691585
								3023.21	0.0237533	3026.51	0.0619132	2917.39	0.119625	2874.2	0.690819
								3044.57	0.0649926	3031.24	0.0289628	2911.25	0.272941	2905.5	0.180404
								3037.99	3.45571	3070.25	0.00650878	2917.27	0.0099722	2921.04	0.0533958
								3018	16.0709	3087	0.00330295	2954.77	0.0046889	2950.24	0.00731687
								3028.62	0.10418	3085.51	0.0149597	2949.19	0.00440532	2961.11	0.0106317
								3042.5	0.0133758	3091.11	0.00501798	2949.75	0.0605298	2968.34	0.00229351
								3057.28	0.00152178	3104.68	0.0150959	2965.49	0.00757524	2973.67	0.0228477
								3067.68	0.00806892	3102.05	0.00108392	2959.51	0.0205202	2979.5	0.00360121
								3064.63	0.0367482	3109.37	0.346152	2969.84	0.0162253	2970.15	0.228262
								3057.53	0.0213071	3109.55	0.00298372	2965.07	0.0314773	2974.48	0.037844
								3080.82	0.0795027	3122.78	0.0177865	2972.12	0.00180218	2987.54	0.0176676
								3081.07	0.00530658	3142.87	0.857458	2973.63	0.0702512	2993.87	0.00262736
								3095.89	0.0321257	284.938	0.0242264	2989.62	0.00579529	2992.12	0.630535
								3089.14	0.0039441	210.439	0.0535284	249.17	0.0486611	249.041	1.07423
								3105.41	0.190496	312.858	0.854196	185.846	0.152304	130.274	0.0961413
								3120.69	0.0200762	336.309	0.065848	327.739	0.0489917	285.613	1.20865
								275.753	4.27662	350.179	0.860284	340.934	0.025157	310.605	0.130743
								365.181	0.216441	387.841	0.0340953	356.084	0.922328	317.533	1.14047
								324.857	0.0183879	375.651	1.58754	396.297	1.82442	331.53	0.302616
								323.481	0.200461	410.991	0.349016	404.252	0.0668688	354.123	0.041859
								365.483	0.223408	447.531	0.234434	444.669	0.0995549	370.649	0.716338
								408.632	0.272878	456.483	1.95184	446.706	0.0253597	402.184	0.103427
								421.93	0.0603096	498.238	0.142135	482.678	0.816587	414.632	16.6512
								464.148	0.0863265	508.874	1.80092	523.892	2.16732	445.253	0.100563
								475.225	0.066733	567.941	0.0880431	550.699	0.11214	479.336	1.91176
								501.067	1.12223	586.174	0.0372434	553.394	0.520195	526.335	0.090251
								542.518	0.202887	657.241	1.64439	595.879	0.341981	542.897	0.0436568
								577.387	0.624935	664.782	0.229734	649.251	0.524148	611.48	0.313486
								593.597	0.180183	751.115	2.26486	679.459	0.786838	617.599	0.324019
								625.701	0.349325	788.461	9.44266	693.233	5.675	693.549	1.28836
								671.937	0.30833	823.335	9.19588	821.696	76.5794	732.647	4.58591
								711.931	3.81981	880.297	0.125966	840.103	0.923049	775.91	0.903414
								743.955	5.631	907.113	0.15117	905.98	0.0183091	819.332	0.234562
								840.401	0.0524152	942.495	0.0394828	885.377	0.034316	852.953	0.0839864
								882.29	0.239004	954.158	0.216425	898.463	0.121157	896.973	0.0539644
								941.323	0.173026	1052.38	0.53016	942.588	0.295958	898.257	0.0824592
								909.561	0.017553	1086.82	39.0971	1029.03	1.0357	1005.49	0.293238
								948.736	0.0596743	1083.35	2.40974	1065.68	0.394697	1009.22	1.08596
								972.974	0.0801429	1137.57	0.0530094	1123.65	0.3082	1039.54	3.5729
								1051.08	0.536758	1156.87	0.105458	1122.29	1.7244	1087.44	0.0656973
								1092.66	10.4179	1188.79	0.22323	1126.64	28.6373	1102.31	0.0397507
								1155.94	0.169652	1200.94	0.0754615	1133.74	0.65603	1127.65	0.168531
								1159.86	0.642417	1209.06	0.194585	1165.46	0.884252	1131.51	0.0980652
								1185.05	0.522988	1232.24	2.24262	1183.43	0.04333	1148.2	0.272153
								1183.36	0.150291	1245.13	0.113144	1190.14	2.39322	1171.02	12.2799
								1207.63	0.914815	1263.98	0.0260249	1232.23	0.00581178	1183.7	0.124486
								1222.84	0.225965	1279.98	0.127612	1263.5	1.98414	1191.72	0.0357694
								1235.14	2.76817	1321.28	1.43357	1249.91	0.0348081	1209.6	0.217237
								1292.86	0.00405884	1348.39	0.029891	1311.02	0.712642	1254.87	5.04434
								1313.46	3.25128	1425.8	0.780445	1342.29	1.9657	1282.71	0.014391
								1318.02	0.0493193	1450.31	0.295956	1374.3	0.848773	1354.72	0.65902
								1354.06	0.160997	1506.74	3.87307	1418.85	0.751394	1385.55	0.0493468
								1387.48	0.274853	1523.97	0.349836	1446.52	1.77077	1428.13	2.31191
								1432.96	0.682699	1559.81	0.0142138	1465.46	0.309945	1444.86	0.291506
								1465.04	0.343256	1559.46	0.0107459	1482.09	0.190749	1496.58	0.00766004
								1506.03	0.356002	1563.32	0.0628729	1466.86	0.14684	1480.26	0.0355356
								1520.61	0.125869	1575.87	0.209863	1456.54	0.0894127	1473.6	0.0510993
								1540.62	0.0880958	1585.77	13.0519	1511.89	1.01626	1492.76	0.29462
								1529.36	0.109794	1600.31	55.9027	1500.89	0.0445939	1507.52	0.040195
								1523.04	0.0177609	1610.66	0.198706	1514.32	2.97402	1520.32	56.26
								1582.49	1.03727	1607.94	1.06039	1528.06	6.78655	1522.59	1.44433
								1584.01	0.0285924	1626.16	0.203328	1543.21	3.59579	1518.1	0.359834
								1585.71	42.7111	1625.04	0.272774	1525.49	0.0208588	1556.63	0.349025
								1596.61	235.014	1623.82	0.0864223	1535.68	1.31098	1549.2	0.384304
								1602.05	1596.09	1628.55	0.704742	1546.43	7.1117	1546.08	0.314183
								1593.33	0.018825	1630.08	0.773243	1541.88	15.1904	1550.61	0.669969
								1601.39	55.3208	1635.09	0.276742	1542.38	389.077	1561.78	0.646156
								1607.15	0.0463367	1645.05	1.21165	1549.25	0.0237001	1559.27	0.09439
								1601.85	0.012179	1700.76	1.93566	1572.12	26.4534	1570.65	0.444612
								1614.21	11.1696	3025.83	0.0590029	1678.57	2.47516	1619.35	1.1255
								1608.99	0.0142078	3032.46	0.098965	2977.79	0.00383077	2950.14	0.0387516
								1627.54	4.0787	3052.2	0.0773786	3003.53	0.0397286	2932.36	0.0458344
								1734.8	1.68969	3044.57	0.101407	2980.44	0.102478	2943.72	0.0417531
								3059.22	0.0200865	3052.75	0.136914	2992.74	0.022348	2924.95	0.243073
								3080.17	0.0177821	3057.56	0.100212	2985.7	0.094341	2954.03	0.136976
								3072.54	0.054072	3097.59	0.0570328	2991.9	0.0974711	2969.54	0.0741966
								3052.75	0.0239795	3113.73	0.0123163	3029.29	0.0491858	2998.68	0.00806337
								3063.7	0.0384457	3111.18	0.0810535	3022.99	0.0084794	3010.14	0.0510069
								3076.86	0.0613883	3115.77	0.0360391	3023.95	0.0236415	3016.72	0.0396538
								3092.96	0.0694858	3130.99	0.0493053	3039.8	0.00178744	3022.37	0.057091
								3102.37	0.0441208	3128.31	0.0118949	3034.72	0.0881197	3028.31	0.00684969
								3099.02	0.01455	3133.52	0.0617473	3043.31	0.0392627	3020.05	0.104543
								3093.18	0.0944302	3136.26	0.0415331	3040.18	0.0408004	3023.3	0.044918
								3115.16	0.00191624	3149.47	0.133253	3046.97	0.0180371	3036.05	0.0715541
								3115.84	0.0413514	3168.96	0.209637	3048.76	0.288884	3042.15	0.0177203
								3129.94	0.0291166	238.159	22.5299	3063.83	0.0178476	3045.71	0.372317
								3123.76	0.0177818	344.999	0.271739	165.233	0.327902	200.789	2.35641
								3140.45	0.0146085	368.405	0.00806824	315.683	0.0713318	346.231	0.0645247
								3154.92	0.234482	381.594	1.00114	330.994	0.0105573	369.868	0.00452926
								361.64	0.244589	419.942	1.14407	342.799	1.40437	377.457	0.404978
								329.369	0.0252059	407.522	0.446443	380.895	0.15568	393.147	0.189629
								329.198	0.00503016	441.482	0.350162	389.985	0.138132	415.762	0.51753
								368.295	1.33078	478.731	0.0190154	429.316	0.105328	431.301	0.270836
								410.737	0.211861	486.621	1.32985	432.888	0.789408	462.656	0.015427
								424.015	0.268367	529.721	2.42862	468.99	0.135938	475.398	0.667096
								464.926	0.0898282	541.657	0.794135	508.26	0.0209751	506.09	0.11483
								478.12	1.06893	600.34	0.428066	536.901	0.566356	539.953	2.6088
								503.685	0.608773	616.849	1.17848	540.288	2.25453	587.429	0.432946
								543.655	0.0330796	689.279	0.607634	582.656	0.720432	602.671	1.85565
								579.844	6.56456	695.942	2.56679	635.044	0.650607	672.476	0.0384562
								595.95	1.34215	782.363	103.866	665.401	0.210336	678.068	1.2509
								627.9	0.588898	819.189	0.15853	679.141	5.45307	754.754	33.5337
								673.473	1.29183	854.961	0.328199	807.485	8.26107	793.056	0.0907643
								713.382	0.279758	911.657	0.0727361	826.205	0.344512	836.57	0.012553
								746.75	100.835	939.241	0.109016	890.812	0.0311004	880.132	0.0206373
								842.416	7.8745	973.939	0.212062	871.465	0.729464	913.363	2.05412
								883.341	0.0648889	985.607	0.143021	884.22	0.0599216	957.224	0.0590788
								942.978	0.00549598	1083.25	0.157249	928.84	0.0865654	959.005	1.22993
								911.829	0.00437074	1117.32	0.850491	1014.75	0.414983	1066.49	0.263127
								950.124	0.0727725	1115.07	0.0635495	1051.03	0.167589	1070.67	0.0171085
								974.611	0.219669	1169.05	0.0778605	1109.1	4.47284	1099.57	53.8035
								1052.73	0.470953	1187.96	0.00736437	1108.46	9.14069	1148.24	0.0553425
								1094.45	0.463765	1220.75	0.357247	1113.1	0.480166	1162.99	0.0139303
								1157.96	0.208172	1232.27	0.342945	1119.56	0.194501	1188.55	0.302447
								1161.92	0.948399	1240.95	11.4918	1151.18	0.191896	1192.1	0.0952564
								1186.95	0.114663	1263.41	0.164903	1168.94	5.11996	1208.78	13.1094
								1185.05	0.341816	1275.99	0.237606	1176.13	6.49192	1231.38	0.321324
								1209.16	0.154262	1294.48	0.00103717	1218.22	0.00236068	1244.41	0.216799
								1224.71	1.09531	1311.32	0.00564797	1249.86	0.124183	1253.22	0.00291411
								1236.41	22.7562	1352.18	0.0161434	1235.74	0.0622363	1270.75	0.00867629
								1294.78	0.00236859	1378.31	0.115708	1296.69	0.137155	1314.85	0.0424572
								1315.78	0.0863146	1457.38	0.0805894	1328.2	0.25737	1342.23	0.845772
								1319.88	0.0955393	1480.81	11.5379	1360.02	0.170045	1415.49	0.399639
								1356.24	0.0520268	1538.87	10.2646	1403.03	0.867488	1445.76	1.83785
								1389.92	28.7938	1555.51	0.393895	1430.97	0.358091	1489.28	1.80385
								1433.89	0.378606	1592.02	0.454287	1450.74	0.132041	1506.54	0.128651
								1465.83	8.51404	1591.29	5.59237	1467.19	0.0127107	1559.25	0.15503
								1507.32	3.91139	1595.2	0.0136598	1452.47	0.244998	1541.5	0.96434
								1521.97	0.211366	1606.87	0.00270958	1442.65	0.0725636	1534.31	0.044342
								1541.85	0.00963855	1616.09	0.477748	1496.97	0.172483	1553.93	0.00295675
								1530.78	0.309819	1630.79	1.20052	1487.01	0.0376911	1568.13	0.171842
								1524.17	0.0311235	1640.88	0.00456072	1499.72	1.35241	1579.93	0.999192
								1584.53	1.23849	1638.73	0.102197	1514.07	2.19684	1584.1	0.227462
								1585.91	1.907	1657.59	0.00592576	1529.18	4.13534	1580.77	0.011375
								1587.31	0.0733001	1656.25	0.0078941	1511.53	0.0196547	1617.67	0.00660151
								1599.1	30.6571	1655.63	0.000536882	1522.07	0.00667209	1609.09	0.017777
								1604.58	8.90679	1659.64	0.165935	1531.76	0.0211525	1608.33	0.0801835
								1595.27	0.016752	1661.33	0.0351834	1528.08	0.0168631	1611.25	0.29249
								1603.16	0.0192456	1666.46	0.359946	1529.22	24.6692	1621.42	0.0628914
								1609.09	1.90362	1675.89	0.194107	1534.71	14.6533	1619.63	0.350991
								1603.79	0.0171088	1731.74	0.594892	1558.28	23.3417	1629.77	0.0386424
								1616.02	5.46823	3057.27	0.0122031	1664.11	4.88421	1680.58	0.446971
								1610.97	0.342358	3063.92	0.00933364	2963.8	0.00222783	3010.15	0.00336618
								1629.31	8.7845	3083.49	0.00676245	2988.44	0.00831984	2993.88	0.0404929
								1735.82	6.32075	3075.04	0.000890162	2966.08	0.0410398	3005.24	0.00449989
								3059.6	0.0156873	3084.19	0.00143082	2978.02	0.00688002	2987.84	0.00280902
								3081.12	0.00638047	3088.82	0.028562	2971.58	0.0227422	3015.1	0.00249254
								3074.2	0.0395472	3128.9	0.0611207	2976.55	0.0053052	3030.04	0.0380331
								3054.53	0.019793	3144.59	0.0110126	3014.97	0.050004	3060.02	0.00792449
								3065.06	0.0152335	3143.33	0.0231377	3008.96	0.00292219	3071.65	0.0404157
								3078.4	0.00883897	3146.51	0.152063	3009.42	0.119128	3076.66	0.0759561
								3093.81	0.0530843	3162.5	0.0274928	3025.72	0.0036488	3083.72	0.0456831
								3103.06	0.00634282	3159.36	0.01744	3020.8	0.0130269	3089.59	0.026242
								3100.05	0.115349	3164.06	0.00206061	3030.16	0.00797473	3082.19	0.00328546
								3095.47	0.0275131	3167.36	0.00121961	3025.96	0.0092055	3085.06	0.0161028
								3117.01	0.00349587	3179.75	0.0460676	3031.82	0.0119998	3095.3	0.0847704
								3117.63	0.00569334	3200.53	0.00422504	3034.1	0.0907092	3102.25	0.00535879
								3132.45	0.00581166	270.261	0.655614	3049.8	0.0150128	3111.21	0.00802445
								3125.76	0.018904	296.322	1.79799	247.351	5.63498	235.654	2.99691
								3142.22	0.0141957	307.32	4.4615	264.48	4.82044	266.171	0.200402
								3156.35	0.22193	344.608	3.41432	276.149	1.20091	268.791	3.45428
								421.264	1.50601	329.764	36.3824	313.946	1.65669	279.919	4.28358
								422.123	0.0922722	367.531	0.045003	323.747	1.04542	306.597	9.53406
								460.505	5.44709	403.412	1.56665	361.365	0.0449424	322.792	0.0494125
								500.352	0.304137	409.468	0.148607	363.797	0.591703	353.075	1.00399
								514.911	0.357396	455.324	0.0401731	403.395	2.84794	365.231	0.360747
								551.925	0.0114277	468.835	0.920356	443.456	1.71141	396.449	0.0225663
								568.022	0.619293	530.808	0.0535453	471.074	0.120404	436.047	0.528525
								596.502	1.14048	542.347	1.06597	473.784	0.00768351	484.446	0.639376
								635.743	0.237818	616.88	0.446663	516.313	0.559708	495.05	0.799524
								673.232	0.0333246	622.415	1.42049	570.332	60.8524	566.314	0.120269
								686.836	0.00495855	707.006	0.933526	598.939	0.116946	572.625	5.47298
								719.423	0.359638	745.535	2.32708	612.345	0.476807	645.459	2.22982
								767.34	2.85954	778.911	0.51099	738.769	0.359639	685.339	1.33904
								804.743	0.0292575	837.015	0.00191945	759.169	0.0108064	727.152	0.55582
								841.12	19.754	864.705	0.075295	822.607	0.00622716	771.621	0.00756579
								932.401	0.554425	899.257	0.00827251	806.768	0.0668024	806.312	0.144666
								974.972	0.00189091	911.516	0.203615	817.072	0.0067183	850.049	0.0076607
								1032.62	0.00472745	1009.06	0.695172	861.42	119.974	851.694	0.495334
								1002.66	0.0194357	1042.56	0.145281	947.322	0.15977	958.041	0.226132
								1040.76	0.0020561	1040.47	0.0273469	982.777	0.0810837	962.06	0.00179441
								1065.95	1.49713	1094.77	0.254443	1036.98	9.08935	991.671	0.0807901
								1142.77	0.222437	1114.08	0.131243	1040.82	35.7529	1040.26	0.225249
								1185.48	0.0975837	1144.61	0.800423	1046.26	0.823894	1055.46	0.378507
								1250.03	0.207446	1155.38	2.5055	1049.49	6.96641	1079.14	1.18372
								1254.31	0.109368	1166.01	0.823199	1084.38	0.0885093	1082	2.2932
								1280.77	7.09025	1189.03	0.0121395	1101.98	0.4384	1099.99	0.202375
								1281.97	2.37081	1201.33	0.608796	1109.21	0.375351	1123.03	0.0127152
								1300.65	0.294047	1218.94	0.000797195	1151.41	0.000444395	1135.47	1.85561
								1315.65	0.483295	1236.7	0.00150021	1181.13	0.0644111	1143.37	0.000686668
								1327.21	0.155032	1277.23	0.090783	1168.86	0.00527399	1162.26	0.00174142
								1385.58	0.000429322	1304.2	0.0710577	1230.24	0.158448	1206.27	0.14775
								1407.06	0.0342643	1382.6	2.70461	1261.19	4.21625	1234.12	0.144341
								1410.8	0.000499299	1405.12	3.39053	1290.88	3.04369	1307.52	1.34631
								1446.56	5.91024	1463.31	1.49461	1333.98	0.157708	1335.38	4.69643
								1480.15	0.57389	1480.22	0.637893	1362.86	0.239237	1380.7	1.1683
								1523.79	1.35658	1516.12	0.0139776	1382.36	0.129374	1396.64	0.452103
								1555.8	0.321453	1519.36	1.70707	1398.61	0.00618121	1447.8	0.0107094
								1596.99	0.156512	1523.3	0.0273327	1388.5	0.0971586	1438.57	6.35494
								1610.85	0.0208158	1532.21	0.00585083	1377.33	0.0150159	1430.59	0.0215774
								1631.94	0.00908373	1539	1.54354	1424.71	96.0805	1444.38	0.00927081
								1627.12	0.27586	1552.81	0.846405	1420.18	0.730047	1455.63	1.54347
								1615.67	0.52638	1565.11	0.00546383	1424.88	22.842	1471.29	0.615542
								1678.51	10.0185	1558.19	1.06996	1441.1	0.243321	1465.25	1.84044
								1676.6	0.00313513	1582.55	0.0128554	1461.43	0.120642	1470.39	0.00457234
								1680.69	5.18193	1582.64	0.0205823	1444.4	0.000174418	1508.81	0.00448782
								1693.29	1.12973	1581.06	0.000886644	1454.85	0.109906	1502.86	0.035516
								1694.96	0.0422927	1585.61	0.0499058	1463.4	0.487654	1500.01	0.00694799
								1686.09	0.000575948	1586.64	0.0227999	1460.05	0.0671295	1503.91	0.0818055
								1693.8	0.00966029	1587.81	0.240784	1456.98	0.282401	1513.89	0.0128738
								1701.24	0.0576314	1600.28	0.67872	1463.53	0.979529	1508.97	0.175537
								1694.77	0.0273884	1653.84	0.0537651	1491.04	0.311386	1519.51	0.833215
								1707.32	0.0823121	2981.47	0.00136329	1594.29	0.124089	1568.02	0.073009
								1704.11	0.198092	2988.9	0.00714542	2896.47	0.000333809	2904.44	0.0581804
								1721.35	0.0780088	3012.14	0.0858211	2921.58	0.00115432	2883.84	0.00163828
								1823.6	0.0113009	3000.39	0.000339812	2899.3	0.0886589	2895.36	0.00478913
								3150.4	0.000544781	3010.18	0.000977277	2911.72	0.00290691	2878.85	0.000371426
								3171.89	0.00374933	3014.64	0.000366036	2905.9	0.000559785	2907.54	0.00117238
								3168.3	0.103486	3053.21	0.00365774	2910.01	0.000501881	2921.7	0.00025535
								3146.78	0.0506498	3070.18	0.0371617	2948.23	0.0033899	2951.61	0.0517547
								3157.04	0.00168211	3068.97	0.0620423	2943.64	0.108414	2961.77	0.00410208
								3169.59	0.000148105	3077.28	1.05426	2943.05	0.904025	2968.65	0.803598
								3184.59	0.00185367	3088.32	0.0433099	2958.31	0.000552887	2974.46	0.0262137
								3194.34	0.0311293	3085.42	0.000673723	2954.56	0.0289263	2980.99	0.00122173
								3194.97	1.13381	3089.03	0.00111724	2963.78	0.000240607	2973.18	0.00119508
								3186.59	0.0600369	3093.02	0.000910164	2960.52	0.0219215	2975.69	0.0183399
								3207.64	0.000100716	3106.05	0.279331	2965.36	0.000974828	2993.69	0.544269
								3208.48	0.000733278	3125.66	0.00113231	2966.4	0.293418	2994.7	0.00189255
								3225.24	0.00552557	394.555	0.43882	2982.55	0.00138172	3002.12	0.000853806
								3216.89	0.000665186	410.986	3.37642	403.352	1.01328	406.501	0.307277
								3232.97	0.000165328	448.95	0.0176586	421.567	0.619527	414.478	5.75896
								3247.99	0.288627	437.07	8.71513	462.383	0.471501	431.266	82.3965
								370.248	0.394979	471.466	0.0358374	470.39	0.0249217	452.909	7.47606
								417.855	0.286492	508.149	0.0472707	510.107	0.0397013	468.224	0.124206
								462.786	0.975212	516.612	0.0758571	512.926	0.254109	499.91	0.0346711
								476.337	0.0318511	558.285	0.0714651	547.979	0.0459736	512.18	0.140769
								518.006	0.256639	569.676	0.431686	590.208	1.93376	542.74	0.0759877
								530.304	0.127483	629.253	0.0740566	617.41	0.0560028	577.499	0.619407
								555.443	0.034051	646.76	0.875789	620.409	0.0370258	623.106	0.055002
								596.812	0.727663	718.627	0.173682	663.77	0.724085	640.207	0.382966
								632.404	0.0496817	725.776	0.368633	716.012	0.0154937	709.456	0.1655
								648.308	0.186701	811.971	0.125254	746.44	130.188	715.146	0.17167
								681.073	1.41192	848.782	1.16372	760.063	0.0923635	791.258	0.0197845
								726.553	0.0572846	884.194	1.05058	887.999	0.267844	830.005	1.59669
								766.44	36.1992	940.459	5.35821	906.745	0.692986	873.195	0.772617
								798.921	0.334636	968.282	0.145351	970.534	0.0643281	916.301	8.5056
								895.226	0.370681	1003.32	0.864295	955.641	22.0224	950.92	0.130627
								936.55	0.525399	1015.47	21.3221	964.276	7.63159	993.991	0.695562
								995.5	3.0417	1113.42	0.084492	1010.11	27.8075	996.704	1.00917
								966.789	0.363216	1146.82	0.092112	1096.43	0.0297019	1103.4	0.00883337
								1002.57	7.68043	1144.82	2.76505	1131.59	94.8592	1107.67	2.95121
								1028	84.1094	1198.66	0.257985	1189.34	0.646632	1137.06	0.0774017
								1106.12	0.100154	1217.58	0.8809	1188.94	6.37222	1185.02	0.189376
								1147.01	0.0543415	1250.37	0.0686961	1193.28	2.36871	1199.76	5.74509
								1210.51	6.87889	1261.81	0.0276466	1201.15	119.861	1225.64	0.116554
								1214.44	7.49777	1270.42	0.00310931	1232.41	0.0270369	1229.04	0.0697598
								1239.5	630.868	1293.3	0.0436021	1249.59	0.173494	1245.87	0.0420346
								1238.92	247.215	1305.78	0.063501	1256.67	0.265674	1268.54	0.042633
								1262.32	0.0421389	1323.62	0.0368521	1298.48	0.0405038	1281.24	0.159114
								1277.44	0.585555	1340.3	0.183562	1329.53	0.230573	1289.71	0.0469752
								1289.11	0.0906179	1382.01	0.503935	1315.51	0.207541	1307.58	0.175538
								1347.24	0.0471515	1408.9	0.0141512	1376.87	0.313976	1352.41	0.0337048
								1368.08	0.0396444	1486.25	1.95705	1407.39	1.48743	1380.46	0.0187768
								1372.19	0.259326	1510.15	2.77307	1439.83	2.01821	1452.01	0.244942
								1408.26	0.325771	1567.4	1.00363	1483.56	0.00954237	1482.5	0.641134
								1441.52	0.552536	1584.7	0.0119713	1511.11	0.00138642	1525.47	1.07335
								1486.27	1.22963	1620.31	0.00463027	1530.44	0.109095	1542.96	0.0211354
								1518.69	0.0557421	1621.08	0.376555	1547.15	0.0280679	1593.9	0.00892878
								1559.31	0.00240222	1625.01	0.0363722	1532.81	0.14331	1578.28	1.0145
								1574.27	0.576531	1636.08	0.0760297	1526.04	0.00252771	1572.32	0.00805242
								1594	0.0028753	1646.49	0.357807	1577.39	2.43624	1590.7	0.165334
								1584.02	1.28045	1660.35	0.44586	1566.99	0.0296197	1605.46	0.24193
								1578.65	0.00425695	1670.26	0.0253157	1580.07	0.0252961	1617.23	0.531071
								1637.15	0.812733	1668.53	0.00531816	1594.41	0.156189	1621.11	0.0797118
								1638.26	0.028129	1687.4	0.0738544	1609.92	0.661318	1617.62	0.0418471
								1640.49	0.0215355	1685.92	0.168787	1591.85	0.00839839	1654.81	0.0572815
								1651.35	0.0403166	1685.29	0.00614787	1602.5	0.566101	1646.21	0.213753
								1657.1	0.455241	1689.32	0.031235	1612.3	0.0406909	1645.44	0.00647635
								1648.02	0.0180364	1690.64	0.130822	1608.57	0.00385368	1648.77	0.0439733
								1655.72	0.322137	1696.04	0.029179	1609.47	0.0855823	1658.61	0.100184
								1661.52	0.0611641	1705.89	0.0759469	1615.05	0.298118	1656.68	0.077629
								1656.62	0.00933245	1761.67	0.0203079	1638.41	0.0353356	1667.16	0.0836787
								1668.16	0.0974204	3085.99	0.013181	1744.25	0.108641	1718.11	0.0176066
								1663.91	0.0512513	3093.09	0.0020361	3043.98	0.00166464	3047.14	0.0262507
								1682	0.0493235	3112.6	0.0283389	3068.81	0.00761164	3029.89	0.011615
								1788.06	0.237543	3104.47	0.0108306	3046.51	0.00311173	3041.68	0.00404565
								3112.13	0.0125201	3113.33	0.000636813	3058.82	0.00253714	3024.65	0.00871071
								3134.25	0.000969001	3118.05	0.00314099	3051.93	0.000893477	3051.59	0.00292881
								3126.99	0.00371001	3157.95	0.112466	3056.66	0.00184191	3066.89	0.00288131
								3107.3	0.00220736	3173.78	0.0616082	3095.18	0.0880961	3096.77	0.0234533
								3117.86	0.00103548	3172.46	0.117085	3089.32	0.0617027	3107.89	0.0948173
								3130.86	0.00300912	3176.13	0.0416183	3090.03	0.0783747	3113.81	0.0815621
								3146.35	0.111523	3191.6	0.0363845	3105.91	0.0133082	3120.25	0.0928536
								3156.28	0.168777	3188.95	0.00540602	3101.12	0.142841	3126.29	0.00853066
								3153.34	0.0263602	3193.55	0.023417	3110.12	0.0159342	3119.08	0.0236684
								3147.46	0.140204	3196.85	0.0364412	3106.32	0.0950918	3121.49	0.0562897
								3169.88	0.00851438	3209.95	0.0486082	3112.66	0.0349167	3133.05	0.0201657
								3170.13	0.0242973	3229.82	0.0508139	3114.84	0.00658007	3139.26	0.0369586
								3185.3	0.0270156	430.931	1.18862	3129.92	0.0302832	3147.87	0.0547369
								3178.05	0.0269702	472.147	45.5047	435.95	1.31352	436.101	4.81553
								3194.99	0.0350362	460.328	0.000244913	476.273	6.60961	454.095	0.00973956
								3209.33	0.00232626	495.856	0.00136982	485.264	0.0118955	477.331	3.87942
								414.058	1.11037	532.138	2.4052	524.637	1.43328	493.38	0.00111658
								462.013	1.91054	540.674	0.621075	527.57	0.0408537	524.405	1.65966
								476.055	0.499273	583.142	0.00831535	563.012	0.362164	537.131	0.47849
								518.265	2.51308	593.033	0.0476493	604.76	0.0414407	568.061	0.00244043
								530.53	0.00693131	653.646	1.56139	632.083	0.0797228	600.505	0.114514
								555.462	0.890266	670.74	0.00372437	635.364	0.0335159	649.661	0.182222
								596.992	0.0631412	742.454	1.132	678.719	0.259516	665.836	0.00605411
								632.495	0.0766767	750.938	0.0925037	730.58	0.756123	734.276	1.37331
								648.71	0.00272575	836.648	1.27816	762.47	151.148	741.133	0.159607
								681.541	1.04739	873.616	0.0350981	774.9	0.150529	817	1.53028
								726.664	0.96399	909.009	0.180432	903.054	0.0755962	855.82	0.0146581
								766.566	3.18275	965.734	4.39823	921.759	0.884126	899.036	0.121635
								799.435	0.029671	994.432	7.45852	988.52	25.9571	942.474	0.192507
								895.737	0.0943024	1028.82	1.72273	968.906	6.48818	978.136	8.69276
								937.033	10.4523	1041.62	7.77404	979.403	1.0341	1020.13	1.90223
								997.807	5.50113	1139.34	2.05874	1025.63	15.9628	1024.22	229.227
								967.714	0.0610228	1171.16	0.0398562	1112.19	0.236719	1129.97	0.55106
								1003.28	0.824616	1168.84	0.0284892	1145.26	0.202682	1132.94	0.00287456
								1028.72	6.85726	1222.74	1.20507	1204.41	13.7788	1162.38	0.346546
								1107.61	0.714152	1242.08	0.981251	1203.71	0.0301531	1210.8	2.42364
								1147.51	0.944009	1274.56	0.0849433	1208.34	19.9865	1224.77	0.341881
								1210.99	28.1333	1286.18	0.0743694	1214.47	8.26692	1251.02	0.156703
								1214.69	0.173022	1294.66	0.372355	1246.48	0.112561	1254.39	0.283748
								1240.03	1.38006	1318.15	3.07073	1264.12	7.59569	1270.45	7.09171
								1238.34	1.12929	1330.66	21.5289	1270.18	6.28039	1294.27	1.53462
								1262.3	0.0778937	1348.22	0.000956798	1313.32	0.00570447	1306.72	4.83044
								1277.43	0.221625	1365.16	0.00115632	1343.87	0.266796	1315.34	0.000407634
								1288.43	5.11387	1405.81	1.03039	1330.74	0.0091804	1332.95	0.000127199
								1347.6	0.00206782	1432.78	0.051215	1391.38	0.0509463	1377.28	0.249973
								1368.58	8.01792	1510.76	2.00417	1422.06	0.851733	1404.85	0.0106577
								1372.77	0.0100262	1533.71	0.243926	1454.9	10.1093	1477.56	33.5879
								1408.45	0.0311464	1591.84	0.0168455	1498.58	0.203654	1507.5	0.311249
								1442.11	0.0787589	1609.48	0.533182	1525.87	0.0231534	1550.78	0.0323998
								1485.64	0.136959	1645.31	0.21342	1545.63	0.00726595	1568.75	1.51903
								1519.46	0.204901	1646.91	0.0441683	1562.83	0.0256396	1620.18	0.283943
								1559.89	0.0166569	1650.52	0.00844886	1547.55	0.00444038	1604.35	0.0638811
								1574.77	0.004895	1660.64	0.00373352	1541.02	0.00420953	1599.65	0.00258849
								1594.93	0.016535	1670.98	0.142919	1592.29	0.023605	1616.06	0.00236023
								1584.42	0.00327158	1684.57	0.161718	1582.02	0.00239275	1630.83	0.0535578
								1579.43	0.00519919	1694.61	0.000336175	1594.98	0.0177343	1642.23	0.158976
								1637.6	0.119547	1692.99	0.0126762	1608.81	0.0199996	1646.71	0.0276247
								1638.7	0.00177684	1712.47	0.237643	1626.36	0.467768	1642.98	5.90769e-05
								1640.79	0.00867274	1710.56	0.477783	1606.39	0.0008518	1681.22	0.272549
								1651.67	0.048494	1709.38	0.0026407	1617.42	1.54936	1671.1	0.37281
								1658.03	0.365688	1713.51	0.211204	1626.12	0.533103	1670.68	0.0555399
								1648.15	0.0166842	1713.58	0.608352	1622.94	0.0306542	1674.43	0.258592
								1656.11	1.18654	1719.79	0.0568041	1624.09	0.281411	1683.16	0.635458
								1661.26	0.230001	1729.88	0.00931604	1629.03	0.457508	1681.15	0.0604991
								1656.81	0.00641042	1786.07	0.0279189	1652.37	0.428727	1691.48	0.0238156
								1667.88	0.619885	3110.11	0.0249461	1759.07	0.0186392	1743.29	0.0355796
								1663.95	0.156182	3117.76	0.00203151	3058.57	0.000451926	3072.16	0.000660295
								1682.34	0.166766	3136.61	0.000791074	3083.63	0.0199775	3054.4	0.0238092
								1788.56	0.0156056	3128.62	0.000396247	3061.17	0.000896764	3067.61	0.00196317
								3112.33	0.0261885	3137.34	0.00264627	3073.61	0.0019126	3049.96	0.000238124
								3134.93	0.00125201	3141.89	0.0112835	3066.68	0.00235459	3076.53	0.00515393
								3127.2	0.000139129	3182.24	0.401269	3071.4	0.00628082	3091.45	0.00910194
								3107.42	0.000173856	3198.4	0.250645	3110.25	0.309308	3122.55	0.0871543
								3118.13	0.000684246	3196.1	0.338081	3104	0.120923	3132.59	0.324393
								3131.1	0.00719481	3199.98	0.0369492	3104.66	0.0243162	3138.82	0.0195696
								3146.73	0.419873	3215.66	0.221081	3120.44	0.00110947	3145.35	0.29026
								3157.19	0.240963	3213.02	0.0398538	3115.74	0.176887	3150.82	0.0246531
								3153.49	0.0247886	3217.65	0.000392077	3124.56	0.0437518	3144.29	0.000381914
								3147.27	0.210919	3220.91	0.0888379	3120.95	0.157088	3147.26	0.302324
								3169.78	0.000235731	3233.73	0.00161544	3126.72	0.144078	3157.79	0.0240365
								3170.34	0.0959859	3254.11	0.00101212	3129.4	0.000277272	3163.45	0.116334
								3185.72	0.0661653	484.979	0.463581	3144.59	0.00245336	3173.3	0.000429891
								3178.38	0.0736883	473.385	0.596379	489.422	0.0542144	461.36	0.605061
								3195.11	0.00155778	508.535	0.185808	498.111	0.204287	483.254	0.340512
								3209.51	0.00178799	544.134	0.0397836	537.07	9.23075	500.029	0.0688982
								501.492	0.079523	553.262	0.160217	540.284	12.3965	531.395	0.088085
								515.208	0.0787561	595.633	0.0474893	576.388	0.0322967	543.426	0.0132465
								556.674	0.990494	605.503	0.349092	616.55	0.262479	574.534	0.00170524
								569.214	0.276382	667.427	38.0894	644.662	0.0783903	606.717	0.472467
								594.692	0.0285016	683.74	1.82376	647.663	0.273259	656.429	7.51962
								635.049	0.315869	755.556	8.99071	690.353	3.80841	671.977	1.05492
								671.2	0.0214186	762.619	3.57562	742.224	63.934	741.248	5.23382
								687.319	0.825392	849.028	0.924404	774.028	1.4082	746.605	9.20645
								719.622	1.29048	885.298	1.08909	787.427	2.61192	823.116	0.504958
								765.333	14.5999	920.86	6.4759	915.237	0.144433	861.77	1.54028
								804.997	95.5903	977.996	55.9821	934.234	1.84092	904.603	6.8675
								838.05	0.0458002	1005.46	3.17637	1000.39	1.98188	948.334	58.4843
								934.058	0.299783	1041	13.6824	980.825	0.0780846	982.695	2.39041
								975.557	2.9787	1052.57	0.717618	990.873	17.8849	1025.63	0.118201
								1035.54	1.08681	1150.89	0.226609	1037.05	4.94816	1028.22	1.5093
								1005.21	0.103932	1183.89	0.139991	1123.13	0.754084	1135.54	0.11888
								1042.23	9.99707	1181.5	1.48894	1158.91	0.0493211	1139.66	1.17239
								1066.51	0.631837	1235.3	3.15974	1217.15	1.00602	1169.47	0.796684
								1144.96	0.00549932	1254.53	0.369989	1216.33	2.58863	1216.79	0.198938
								1186.29	0.0725139	1287.19	0.333611	1222.21	1.95347	1231.79	0.183968
								1249.96	0.440955	1298.67	0.0639938	1227.74	2.13989	1257.2	0.54355
								1253.5	7.76109	1307.85	27.492	1259.03	0.370613	1260.78	0.108169
								1278.58	0.173706	1329.96	8.10026	1276.82	12.2466	1277.4	1.0278
								1277.28	1.02576	1342.67	0.515852	1283.61	0.773619	1300.4	6.42334
								1301.2	0.784019	1360.9	0.0187114	1325.87	0.0665154	1312.81	0.180481
								1316.18	4.07004	1377.67	0.0523946	1357.15	0.0857512	1321.97	0.0287659
								1328.09	0.863447	1418.86	0.83575	1343.29	0.140627	1339.48	0.0267457
								1386.11	0.0519511	1445.35	2.03918	1404.56	39.521	1383.45	2.13333
								1407.08	0.0518144	1522.8	0.0769406	1435.32	0.36595	1411.69	3.65346
								1411.17	0.134299	1547.36	0.77926	1466.92	0.11504	1483.54	0.0555847
								1447.3	1.06732	1604.51	0.00772461	1510.32	0.0409483	1513.81	0.440213
								1480.42	1.62587	1621.73	0.313266	1538.13	0.258563	1557.16	0.0167211
								1525.23	0.11612	1657.63	0.00760093	1558.06	2.82698	1574.63	0.51551
								1557.77	0.0308001	1658.1	0.078973	1574.86	0.00389461	1625.53	0.00821979
								1598.39	4.13027	1661.91	0.0994382	1560.02	516.57	1609.89	0.198465
								1613.45	1.39477	1673.34	0.0656024	1551.78	0.0105713	1604.13	0.0908719
								1633.49	0.00530544	1683.59	0.0847893	1604.54	0.169507	1622.75	0.114263
								1622.72	1.09601	1697.15	0.485931	1594.68	0.00796107	1637.35	0.0331944
								1617.11	0.245915	1707.16	0.0128362	1607.51	0.695525	1648.73	0.45495
								1675.96	0.0703374	1705.53	0.0707855	1621.1	0.221964	1652.89	0.125294
								1677.3	0.0100209	1724.66	0.0918617	1637.61	0.221687	1649.47	0.0247197
								1679.52	0.648659	1722.93	0.153912	1619.29	0.0105333	1686.22	0.0409236
								1690.5	0.083984	1722.17	0.00454228	1629.71	0.171076	1677.73	0.158572
								1696.32	0.198758	1726.45	0.0313362	1639.15	0.178945	1677.26	0.00979826
								1686.92	0.00731767	1727.05	0.184026	1635.97	0.0247859	1680.61	0.0333927
								1694.88	0.156961	1732.9	0.0390751	1636.88	0.0880456	1690.19	0.0453377
								1700.49	0.231182	1742.52	0.0701809	1642.03	0.279332	1688.29	0.0926041
								1695.63	0.00826082	1798.77	0.0168973	1665.83	0.509934	1698.38	0.0278659
								1707.21	0.0678156	3122.92	0.0190219	1772.43	0.310115	1749.81	0.0779808
								1702.78	0.153804	3130.22	0.00247016	3071.38	0.00132713	3079.06	0.157359
								1721.25	0.328364	3149.68	0.110138	3096.47	0.010003	3061.74	0.00912158
								1827.51	0.437229	3141.54	0.00494981	3074.14	0.147488	3073.69	0.00390757
								3151.31	0.0159044	3150.38	0.00798644	3086.27	0.00172753	3056.59	0.00471003
								3173.37	0.00207445	3155.03	0.00975417	3079.64	0.00606033	3083.49	0.00395914
								3166.02	0.0601684	3194.97	0.187281	3084.42	0.0132211	3098.49	0.00722471
								3146.27	0.0253146	3210.84	0.0952353	3123	0.131922	3128.67	0.0475222
								3156.96	0.00853134	3209.49	0.0789872	3116.74	0.0454687	3139.74	0.0663414
								3169.94	0.0191033	3212.98	0.00177105	3117.58	0.00897716	3145.81	0.0251703
								3185.58	0.166893	3228.59	0.0915065	3133.28	0.0151494	3152.1	0.0910422
								3195.34	0.101681	3225.92	0.0188644	3128.75	0.0433159	3158.13	0.0113692
								3192.42	0.0059936	3230.59	0.00780149	3137.76	0.0412042	3150.94	0.00983616
								3187.09	0.0536501	3233.88	0.0504656	3133.88	0.0768337	3153.48	0.175344
								3208.81	0.0114467	3247.02	0.294515	3139.9	0.0663643	3164.84	0.23051
								3209.17	0.046429	3266.97	0.0178699	3142.49	0.349252	3170.98	0.0314273
								3224.14	0.0353279	510.049	0.274243	3157.32	0.0272403	3179.88	0.0236697
								3217.22	0.0331573	545.212	0.0682682	536.141	4.00297	497.418	0.00328773
								3233.9	0.0196161	581.978	0.123152	576.101	0.0394456	514.549	0.10657
								3248.53	0.344473	590.029	0.00898138	578.857	0.256076	546.164	0.0780435
								557.204	3.10893	632.536	0.14851	614.677	0.130475	558.361	0.0452757
								598.746	0.0532335	643.046	0.21885	655.095	0.0340165	589.39	0.0295541
								610.541	0.0770655	703.058	7.60928	682.707	3.80444	622.67	0.199743
								636.702	0.289748	719.226	0.136152	686.583	41.1377	669.538	0.092386
								677.511	0.0180715	792.29	471.017	729.176	4.86621	686.38	0.153834
								713.551	5.06516	799.169	28.495	781.437	1.98532	755.837	0.615794
								728.704	0.139105	885.749	0.243805	811.739	0.0958346	760.578	705.223
								761.756	19.2801	922.271	1.36983	825.483	1.29095	837.533	0.146601
								807.509	2.89289	958.182	0.514409	953.119	1.33062	876.239	0.472521
								846.916	0.111532	1014.33	6.11768	972.298	1.60286	919.544	2.63717
								879.232	0.508945	1042.35	49.7554	1037.61	12.641	963.141	0.549991
								975.717	15.3375	1078.83	2.59954	1018.02	415.722	997.928	3.61045
								1016.43	26.3173	1089.46	1.33194	1030.42	2.01126	1039.85	0.0664748
								1077.59	10.1683	1187.56	0.237492	1075.68	7.78768	1042.51	2.13582
								1046.11	64.9025	1220.52	0.0735957	1161.29	0.220663	1149.37	0.0182032
								1083.36	0.709428	1218.32	0.111176	1196.4	27.0522	1153.75	0.57118
								1108.72	8.77809	1271.56	0.0850376	1254.63	4.24025	1183.21	0.00601009
								1186.18	8.4649	1291.56	0.0174284	1254.43	2.8179	1231.28	0.191352
								1226.46	6.08044	1324.26	7.02884	1259.73	0.1709	1246.08	0.0626198
								1290.27	0.749061	1335.18	0.217888	1265.02	11.4222	1271.46	0.227097
								1294.89	1.62444	1343.98	0.128883	1297.22	0.190584	1275.26	0.489684
								1319.98	0.139847	1367.21	0.328715	1315.19	0.717863	1291.84	1.16603
								1318.41	4.28842	1379.46	0.0223314	1322.13	0.331377	1314.66	0.0701281
								1342.61	0.384514	1397.65	0.00157024	1364.37	0.0128591	1327.42	0.190115
								1358.23	0.83834	1414.58	0.00378019	1395.21	1.21934	1336.48	0.0338217
								1370.12	30.6462	1455.64	0.00706909	1381.82	0.0250907	1353.74	0.0613721
								1427.77	0.0124205	1481.67	51.84	1442.7	0.343102	1398.55	0.105524
								1448.52	0.191148	1559.69	1.42004	1474.05	0.599027	1426.56	3.51976
								1452.96	0.0538099	1583.87	12.8281	1505.81	0.545058	1498.49	0.132337
								1489.84	48.8984	1641.29	0.0253998	1549.94	3.07051	1528.71	2.40139
								1522.26	0.389643	1658.7	0.568023	1577	115.382	1571.84	0.0334906
								1567.37	0.549029	1696.49	0.00487396	1597.12	1.25324	1588.88	0.233603
								1599.56	9.03058	1694.27	0.0213618	1613.95	0.790849	1639.93	0.0110785
								1639.77	1.35687	1698.21	0.0133162	1598.25	0.38536	1624.33	0.00172519
								1655.41	1.01432	1710.1	0.0201174	1589.35	0.0376889	1618.05	0.00253087
								1675.46	0.0522565	1720.19	0.16855	1642.94	0.702269	1637.48	0.0407011
								1664.05	0.00578135	1734.28	0.256571	1633.19	0.00332675	1651.75	0.235792
								1658.1	0.0149846	1744.02	0.000343097	1645.67	0.00969489	1663.2	0.0412065
								1717.81	0.807529	1742.25	0.0209169	1659.8	0.205256	1667.25	0.0327124
								1718.88	0.00706226	1762.43	0.055952	1675.82	0.0502652	1664.44	0.0166579
								1720.82	0.00438697	1759.8	0.0496196	1657.4	0.00092314	1700.19	0.00439143
								1732.21	0.155988	1758.84	0.000323491	1668.16	0.0370149	1692.47	0.0552708
								1737.92	0.0219745	1762.99	0.0581921	1677.92	0.00743768	1691.71	0.0309969
								1728.3	0.00212624	1763.33	0.164172	1673.96	0.00384593	1694.9	0.0105291
								1736.55	0.0207811	1769.67	0.157755	1675.08	0.0379728	1704.96	0.0424271
								1742.28	0.0262696	1779.33	0.327065	1680.58	0.233214	1702.87	0.00824086
								1736.91	0.00192824	1835.35	1.39508	1703.64	0.0714375	1712.88	0.17363
								1748.42	0.104914	3160.22	0.0329765	1809.46	2.05688	1764.23	0.213106
								1744.33	0.0489556	3166.7	0.00132155	3109.53	0.0010305	3093.56	0.00475359
								1762.83	0.0712934	3186.15	0.00267991	3135.02	0.00671213	3076.42	0.000674034
								1868.21	2.0336	3178.07	0.00115067	3112.28	0.0432239	3087.94	0.000324287
								3193.46	0.00897731	3187.28	0.00237609	3124.36	0.00221242	3071.18	0.0190242
								3214.4	0.00197119	3191.98	0.0138437	3118.24	0.00202745	3098.05	0.00148262
								3207.45	0.0210454	3232.15	0.327666	3123.45	0.0153678	3113.39	0.000736351
								3187.63	0.0122384	3247.25	0.0294606	3161.08	0.0708015	3142.94	0.0109307
								3199.1	0.00259278	3246.25	0.0321206	3154.67	0.000744092	3154.39	0.00156583
								3212.12	0.0138174	3249.58	0.0060798	3155.73	0.00502167	3160.1	0.00710085
								3227.43	0.0903289	3265.14	0.0186356	3171.44	0.000182435	3166.66	0.0109384
								3236.11	0.00717186	3262.64	0.0625536	3166.95	0.0305095	3172.67	0.0169549
								3233.95	0.00415997	3267.09	0.000740747	3175.68	0.0709869	3165.62	0.0176843
								3228.94	0.0205775	3270.56	0.092852	3171.99	0.0016164	3167.76	0.0156597
								3249.98	9.08852e-05	3283.43	0.0177583	3178.5	0.0278078	3179.51	0.0108333
								3250.84	0.0269898	3303.54	0.000621896	3180.63	0.20338	3185.87	0.0053032
								3265.41	0.000749242	533.691	0.150653	3195.55	1.27089e-05	3193.97	0.0159866
								3258.79	0.0417324	569.873	0.102359	584.191	0.211184	536.46	8.36196
								3275.3	0.000951071	579.528	0.0823205	587.386	0.115926	567.372	0.0209008
								3289.97	0.239463	621.161	0.634053	621.164	0.18293	580.072	0.0459434
								611.829	0.12002	631.931	0.109976	663.931	0.756754	610.735	0.0536891
								624.883	0.584497	691.463	5.92415	691.869	1.04769	643.256	0.248984
								649.545	0.0865659	708.343	0.419303	694.737	0.371251	691.467	4.75111
								691.566	5.22573	780.752	21.3474	737.111	23.2573	707.411	0.0301313
								726.569	0.931253	787.625	10.9175	790.275	2.30697	777.893	0.0315245
								742.504	0.362396	873.385	0.281367	820.182	6.73717	782.768	26.1613
								774.608	18.6675	910.792	1.17925	833.966	0.0198812	859.441	0.425551
								820.841	3.14113	945.996	1.43409	962.163	0.595056	897.815	0.755791
								860.218	2.50303	1002.76	8.34196	980.382	76.5526	941.66	0.140271
								892.785	0.163478	1027.16	1.29318	1044.73	0.0417241	984.558	2.36327
								989.413	1.27385	1064.91	0.0150606	1026.68	0.524803	1018.65	96.7419
								1031.17	719.435	1077.28	30.8093	1038.45	0.187461	1064.37	9.86483
								1088.99	0.118769	1174.96	0.0184011	1083.4	1.13665	1064.7	1.21349
								1059.82	1.64814	1208.69	0.0155435	1169.33	4.677	1171.59	0.471422
								1096.69	0.30598	1206.19	0.462575	1205.79	3.32303	1175.6	0.00969078
								1121.6	0.944655	1260.15	0.175588	1264.11	0.291696	1204.84	0.595646
								1199.64	0.789781	1279.16	0.0758186	1263.31	0.591039	1251.89	0.248058
								1241.67	53.6096	1312	0.106499	1267.91	0.534363	1268.14	0.0750314
								1304.63	12.1804	1322.96	0.0365659	1274.49	0.229267	1293.48	5.12403
								1308.06	0.612398	1332.06	0.602867	1305.97	0.120316	1296.71	1.81752
								1333.62	0.0564016	1354.95	0.358166	1323.54	0.123115	1313.54	0.410185
								1332.32	0.139459	1367.61	0.136899	1330.81	0.220777	1336.52	0.452966
								1356.22	0.0874297	1385.71	0.029801	1373.29	1.75609	1348.85	0.0280372
								1371.74	0.12105	1402.44	0.0437709	1404.03	0.424025	1358.01	0.000603284
								1383.48	0.365103	1443.81	0.282691	1389.55	2.72609	1375.55	0.000199825
								1440.76	1.03526	1471.13	50.6841	1451.38	0.32329	1420.21	0.0171907
								1462.6	2.81218	1548.36	1.01611	1482.2	0.0741142	1447.7	3.38285
								1465.84	8.16847	1571.92	71.1896	1514.61	0.0278939	1519.52	1.70805
								1502.92	0.333414	1629.41	0.0177025	1557.47	56.6267	1550.55	10.5392
								1535.51	0.159562	1646.44	0.629992	1585.3	0.74739	1593.3	0.0196149
								1581.07	0.0698907	1682.04	0.0339344	1604.73	0.314405	1611.08	0.621415
								1613.39	29.4841	1682.32	0.00157954	1620.88	0.0961482	1665.31	0.0343364
								1653.92	0.31977	1686.33	0.00312857	1607.13	0.0639516	1645.85	0.0241192
								1668.75	0.543977	1698.48	0.0189666	1597.94	0.0010253	1639.69	0.0068603
								1687.96	0.00242754	1708.16	0.372103	1651.59	0.486866	1658.79	0.0101415
								1677.75	0.0159263	1721.79	0.312299	1641.78	0.0230391	1673.26	0.375208
								1671.9	0.000366345	1732.63	0.0214749	1654.65	0.0589647	1684.7	0.297916
								1731.37	0.589977	1730.12	0.0186354	1668.38	0.0176763	1688.92	0.0187639
								1732.88	0.0112155	1748.71	0.00217991	1683.24	0.0172223	1685.66	0.000661079
								1734.66	0.124147	1747.51	0.0353465	1666.74	0.0124762	1724.99	0.117692
								1745.73	0.00418654	1747.09	0.0220008	1676.42	0.0421427	1714.39	0.0625833
								1751.09	0.0149784	1751.16	0.00563978	1686.69	0.0469004	1713.23	0.0250884
								1742.69	0.0288795	1752.89	0.0205706	1683.21	0.0108192	1716.42	0.090255
								1750.23	0.0197278	1757.84	0.0142161	1683.87	0.0237939	1725.53	0.0536169
								1756.22	0.0103014	1767.61	0.403151	1689.62	0.0316953	1723.83	0.415931
								1751.44	0.0132662	1823.54	0.889823	1712.82	0.125014	1734.52	0.411569
								1762.96	0.0530513	3147.95	0.00304854	1818.83	1.18826	1785.87	1.65567
								1758.11	0.01026	3154.86	0.00051384	3118.41	0.00804868	3114.89	0.00115964
								1776.56	0.244791	3174.45	0.00564495	3143.09	0.000461948	3096.92	0.0368006
								1882.2	1.75444	3166.57	0.0148156	3121.14	0.00381378	3109.52	0.000722154
								3206.43	0.000301653	3175.22	0.00113918	3132.85	0.00107045	3092.59	0.000439382
								3228.12	0.000563858	3179.9	0.000218295	3126.38	0.00184067	3119.86	0.00208019
								3221.28	0.00558058	3219.77	0.0202052	3131.39	0.00190828	3135.19	0.0103746
								3201.49	0.00797883	3235.41	0.00572563	3169.47	0.0006316	3164.46	0.017508
								3211.97	0.00362572	3234.54	0.00354384	3163.22	0.00657016	3175.07	0.296595
								3225.31	0.00284816	3237.95	0.00503397	3164.57	0.000263563	3181.52	0.000624079
								3240.52	0.00309538	3253.36	0.00148865	3180.39	0.0236403	3188.13	0.0207996
								3249.86	0.00760691	3250.88	0.00212762	3175.6	0.00305093	3193.42	0.117021
								3247.85	0.000179654	3255.62	0.0154546	3184.64	0.00664457	3186.93	0.00197859
								3242.59	0.00655074	3258.75	0.000122409	3180.49	0.00293405	3189.35	0.0242281
								3263.9	0.0167297	3271.75	0.017366	3187.13	0.00103207	3200.69	0.0114756
								3264.45	0.00288758	3291.65	0.0132855	3189.4	0.0110117	3206.11	0.113722
								3279	0.00232635	604.919	0.068938	3204.31	0.00914206	3215.87	0.000173873
								3272.27	0.0043585	613.463	0.192173	626.546	0.0532546	584.026	0.246056
								3289.15	0.00651006	655.798	0.413741	662.33	0.509346	596.663	0.0208781
								3303.66	0.0202342	666.289	4.26402	702.475	0.111437	627.834	4.3754
								665.737	0.00261451	726.321	0.332224	730.809	1.36779	660.158	2.29673
								691.206	7.50741	743.176	16.1764	733.565	14.9104	708.641	0.369411
								732.121	0.0625444	815.587	0.658342	776.645	16.3855	723.746	91.2966
								767.675	2.36947	822.152	0.995546	829.333	0.0917472	794.019	0.774175
								783.302	31.5562	908.761	0.241322	859.596	0.632509	798.81	0.749986
								816.275	120.529	945.584	5.46201	873.347	0.29128	875.786	0.0909643
								861.866	0.0642886	981.511	22.8463	1001.01	76.4364	914.608	1.35655
								901.681	0.196163	1037.95	23.8299	1020.06	1.02399	957.987	4.12494
								934.115	0.355303	1064.99	3.23827	1085.36	1.68205	1001.25	15.4591
								1029.67	255.138	1099.92	1.43123	1066.27	0.240109	1035.12	11.268
								1072.11	0.534207	1111.72	0.514978	1077.82	0.423657	1078.05	0.0348996
								1131.34	4.07119	1209.93	0.0313853	1122.92	0.225516	1080.27	0.408759
								1101.58	4.28856	1243.52	0.538284	1209.03	315.937	1187.34	0.0217193
								1138.02	0.1091	1240.74	0.179171	1244.36	5.44333	1191.3	0.10986
								1163.08	0.275251	1295.15	0.011545	1303.52	13.6908	1220.94	0.476794
								1240.23	20.5552	1313.33	0.0453861	1302.35	3.34964	1268.57	0.0996339
								1281.61	2.29368	1347.05	0.870248	1306.86	0.736927	1284.13	0.0464907
								1345.4	2.38361	1358.49	0.0419417	1314.13	34.9824	1309.87	0.654401
								1349.35	1.78058	1366.87	0.259485	1344.4	0.755151	1313.38	0.539102
								1374.65	2.19622	1390.02	0.178468	1360.99	0.0968149	1329.69	0.924594
								1372.23	17.5886	1402.6	0.269116	1369.47	0.0112684	1352.77	0.00936584
								1396.85	0.509363	1420.21	0.133563	1412.03	3.64307	1365.5	0.277597
								1411.51	0.0818439	1437.16	0.170897	1443.26	2.67798	1374	0.175163
								1423.72	0.161434	1478.98	5.2347	1429.8	0.143343	1391.68	0.162464
								1482.57	0.929104	1505.61	42.1681	1490.11	0.0537632	1436.8	6.82638
								1503.73	3.2781	1583.72	42.7486	1520.56	0.0805701	1464.54	3.46537
								1507.86	1.74091	1607.36	0.760116	1553.74	0.0305746	1537.53	565.608
								1543.45	0.120995	1664.52	0.0209285	1596.3	0.0557845	1566.72	1.42847
								1577.18	0.184338	1681.34	0.124994	1622.83	0.184097	1609.97	0.0331197
								1622.31	23.135	1717.31	0.0221938	1643.05	0.0185145	1627.09	0.117858
								1653.81	0.00246413	1717.28	0.01472	1660.56	0.0171962	1678.34	0.0225425
								1695.35	0.168036	1721.23	0.00706044	1646.19	0.0274477	1662.3	0.0184605
								1710.6	0.0173027	1733.34	0.0650126	1636.61	0.0707631	1655.96	0.00648561
								1729.74	0.00933466	1743.34	0.260954	1690.44	0.343968	1675.47	0.0923166
								1718.73	0.0132573	1756.73	0.0263465	1680.95	0.00995126	1689.87	0.20063
								1712.67	0.0504163	1767.52	0.00427725	1693.58	0.00381746	1700.99	0.008289
								1772.36	0.522999	1765.26	0.0407686	1707.44	0.113492	1705.55	0.093858
								1773.7	0.0208451	1783.7	0.0150275	1722.68	0.00125185	1702.34	0.00646275
								1775.75	0.025946	1782.6	0.00207972	1705.08	0.000401541	1738.5	0.0225549
								1786.79	0.0859784	1782.15	0.0256073	1715.15	0.000375948	1730.69	0.00318132
								1792.54	0.00104134	1786.18	0.00297335	1725.53	0.22121	1729.95	0.031822
								1783	0.000162238	1788.27	0.01004	1722.2	0.0116368	1732.86	0.00337509
								1790.84	0.000492226	1792.77	0.0278398	1722.86	0.00691698	1742.98	0.0313741
								1797.15	0.236678	1802.37	0.0870032	1728.5	0.034696	1740.96	0.0369266
								1791.94	0.00131281	1857.94	0.708393	1751.68	0.235243	1751.07	0.0660575
								1803.87	0.0219764	3182.85	0.00196559	1857.75	0.259309	1801.26	0.876746
								1799.15	0.0226523	3189.89	0.000265173	3157.47	0.00028782	3131.5	0.00537172
								1817.72	0.0950102	3209.31	0.00366332	3182.21	0.00105989	3114.59	0.00351084
								1923.4	0.150102	3201.32	0.00202834	3159.97	0.027467	3126.11	0.000464342
								3247.55	0.00235466	3210.35	0.00241941	3172.18	0.00279848	3109.24	0.00249451
								3269.31	0.00360375	3215.05	0.00102239	3165.99	0.00892636	3136.32	0.00252263
								3262.17	0.0132047	3254.68	0.00173091	3170.29	0.00627065	3151.55	0.00260892
								3242.41	0.00706126	3270.49	0.00217575	3208.67	0.0264448	3181.1	0.000413325
								3253.6	0.0103222	3269.55	0.00957025	3202.6	0.00863639	3192.54	0.00468346
								3266.24	0.00914786	3272.7	0.00284258	3203.4	0.0393982	3198.08	0.00101629
								3281.66	0.0367039	3288.44	0.00101278	3219.32	0.00183513	3204.78	0.0166322
								3291.34	0.0552812	3285.85	0.0210293	3214.6	0.111665	3210.97	0.0400518
								3288.66	0.00660387	3290.32	0.00997257	3223.76	0.0320449	3203.55	0.0093878
								3283.56	0.0926477	3293.67	0.0177624	3219.88	0.00296322	3205.93	0.00294365
								3304.8	0.000542132	3306.45	0.0289404	3225.91	0.0274055	3217.26	0.0326598
								3305.51	0.0361452	3326.89	0.0420246	3228.13	0.064782	3223.91	0.00945179
								3320.35	0.000944679	650.102	0.13105	3243.43	0.00709244	3232.66	0.0574067
								3313.51	0.016838	692.663	47.487	665.546	2.23839	628.099	1.13218
								3330.08	0.00123986	702.997	1.47653	705.701	0.0845976	659.246	0.519142
								3344.49	0.124236	762.649	1.13229	733.694	5.95695	692.686	28.9225
								704.159	0.212327	780.079	0.0898975	737.031	2.42369	740.3	0.261627
								744.517	181.314	852.011	0.489131	779.252	0.595507	756.12	0.118582
								780.257	0.443235	858.848	0.0499779	832.297	0.902178	825.504	0.224703
								796.33	3.57924	945.291	0.205322	862.384	0.451424	831.197	0.0603912
								828.392	1.16752	982.2	31.0583	876.39	0.375195	907.326	2.22387
								874.503	0.670574	1017.14	3.38784	1004.42	8.94394	946.644	56.2476
								914.011	0.561586	1074.2	0.403876	1022.69	3.9114	989.1	6.79034
								946.396	1.28136	1100.81	3.52351	1086.89	0.0938745	1032.25	7.07808
								1043.38	26.9754	1136.6	0.168815	1068.88	0.352376	1066.54	0.768492
								1084.36	1.71344	1148.38	0.194574	1079.96	2.17212	1109.92	2.06889
								1142.53	0.028003	1246.45	1.16635	1125.95	5.77539	1112.16	0.155447
								1113.35	0.071578	1279.84	0.177493	1211.44	1.53599	1219.31	0.016204
								1148.8	3.09099	1277.78	0.800678	1247.67	0.00404569	1223.3	1.07221
								1175.39	2.70327	1331.52	1.6289	1305.92	0.118941	1253.1	0.00396655
								1253.15	12.5166	1350.61	0.395953	1305.01	0.106032	1301.14	0.0185094
								1294.9	0.0808445	1382.99	15.237	1309.59	3.3398	1315.81	0.727617
								1358.42	2.12701	1394.89	2.66207	1316.41	0.996061	1341.7	0.232537
								1361.86	0.380983	1403.23	0.0947	1347.84	0.0707123	1345.26	0.0189331
								1387.22	0.0662471	1426.8	0.0341455	1364.99	0.338701	1361.67	0.133937
								1385.55	66.0824	1439.04	0.238944	1372.59	0.489195	1384.28	0.0411888
								1409.68	0.00837617	1457.43	0.0184668	1417.22	12.4823	1397.27	0.474023
								1425.02	0.169226	1474.3	0.150573	1445.87	0.89201	1406.42	0.0406999
								1436.92	0.0273918	1515.48	32.4117	1432.9	0.124961	1423.86	0.0868484
								1496.51	3.19517	1542.03	1.6926	1493.24	0.0547655	1468.42	0.541937
								1516.12	0.0857648	1620.03	0.234972	1524.15	0.27354	1496.37	0.4375
								1520.37	0.102149	1643.52	0.0162679	1556.41	2.80328	1568.38	0.777575
								1556.38	0.123843	1700.89	0.0709556	1598.89	0.0211117	1598.52	0.230566
								1589.32	0.926291	1718.38	0.0381258	1626.82	0.0463645	1641.67	0.0110084
								1634.36	0.124446	1753.78	0.0502113	1646.78	0.0105138	1658.97	0.113928
								1666.34	0.0107359	1753.81	0.0135893	1662.64	0.0099642	1709.78	0.0274721
								1706.95	0.01086	1757.83	0.0180656	1649.14	0.00223603	1694.1	0.0273864
								1722.11	0.00692392	1769.93	0.00508485	1639.93	0.0123789	1687.81	0.000990964
								1741.76	0.00495813	1779.9	0.0552075	1693.24	0.0536288	1707.15	0.00716539
								1731.24	6.60659e-05	1793.8	0.272532	1683.72	0.0108448	1721.61	0.273323
								1725.37	0.00299517	1803.91	0.00295868	1696.46	0.00263509	1733.28	0.129974
								1784.67	0.0182598	1801.75	0.0126169	1710.37	0.00343849	1737.25	0.0021223
								1786.33	0.00950435	1820.32	0.00767033	1725.29	0.00326015	1734.03	0.00651151
								1788.21	0.00435535	1818.93	0.0108503	1707.76	0.000687451	1770.16	0.00669531
								1799.28	0.00162642	1818.79	0.00123736	1718.35	0.00123797	1762.4	0.0224221
								1804.57	0.00218302	1822.77	0.0578354	1728.42	0.0417834	1761.77	0.00539243
								1795.1	0.000407584	1824.46	0.00359328	1723.2	0.00843484	1764.66	0.0154334
								1803.52	0.00156332	1829.1	0.0133658	1725.48	0.000822651	1774.76	0.0649012
								1809.64	0.0127495	1839.65	0.125231	1731.44	0.0168054	1772.82	0.0021448
								1803.21	0.0149357	1895.03	0.121921	1754.45	0.0426105	1783.17	0.174953
								1816.36	0.00291713	3219.51	0.00217599	1860.38	0.0429642	1834.12	0.515151
								1811.67	0.00874111	3226.39	0.00192665	3160.36	0.00136575	3163.46	0.00458185
								1830.12	0.0168092	3246.05	0.0119648	3185.23	0.00243523	3146.4	0.00133534
								1935.51	0.0842799	3237.93	0.00765924	3163.1	0.0133997	3157.87	0.0029503
								3259.93	0.00208114	3246.93	0.00838829	3175.06	0.0016803	3140.98	0.0189171
								3281.67	0.000198578	3251.63	0.00168947	3168.79	0.00395382	3167.83	0.00389939
								3274.72	0.00176197	3291.33	0.0335512	3173.51	0.00347624	3183.18	0.00573627
								3254.95	0.000315051	3307.18	0.00485748	3211.77	0.0220841	3212.95	0.00857411
								3265.78	0.00215745	3305.97	0.0559362	3205.38	0.00145224	3224.35	0.00573817
								3278.89	0.00145021	3309.5	0.00983216	3206.58	0.00684445	3230.04	0.00192384
								3294.07	0.0088047	3325.02	0.00590397	3222.16	0.00702001	3236.57	0.00255995
								3303.46	0.00103903	3322.48	0.013148	3217.71	0.00788243	3242.76	0.0192696
								3301.29	0.000897456	3326.96	0.00224511	3227.04	0.0270951	3235.3	0.00389558
								3296.16	0.00137397	3330.41	0.00155931	3222.68	0.0023903	3237.7	0.0103549
								3317.27	0.00411376	3343.35	0.015243	3229.01	0.0127043	3249.26	0.00031888
								3317.95	0.012789	3363.36	0.011507	3231.23	0.0452991	3255.76	0.00687771
								3332.55	0.000196492	700.626	3.79167	3246.34	0.0134718	3264.27	0.0209172
								3325.93	0.0108101	711.574	0.547724	741.955	1.43052	671.124	0.00776576
								3342.55	0.0150611	771.55	0.305983	769.944	5.76824	704.079	0.200447
								3356.96	0.00770525	788.48	2.54542	772.987	2.78472	752.157	0.931348
								769.336	0.0650991	860.552	0.515695	815.205	0.918512	768.596	2.54657
								805.345	1.13502	867.31	0.0136654	868.589	0.484944	837.902	0.750192
								821.769	2.4714	953.541	3.10221	898.762	1.93124	843.483	0.0275838
								853.969	0.0675988	990.871	38.8355	912.361	8.74537	919.846	6.52263
								900.137	0.799139	1025.78	4.53876	1040.56	0.0541478	958.642	2.07223
								940.091	2.50012	1082.63	0.667565	1058.91	0.607397	1001.7	9.66114
								972.312	0.065215	1108.79	9.62851	1122.88	0.059312	1045.39	0.108364
								1068.97	1.13069	1145.53	0.439639	1105.49	0.000716221	1079.93	0.314843
								1110.2	0.349919	1156.85	0.254379	1116.62	5.17398	1122.53	0.491583
								1168.47	0.144301	1254.95	1.10951	1162.08	1.51174	1124.08	0.234076
								1137.69	0.00752772	1288.11	0.315699	1248.05	10.1364	1230.98	0.830101
								1176.11	1.41314	1286.24	0.425395	1284.18	0.673298	1235.83	0.0114277
								1201.26	0.874637	1339.82	0.341749	1342.46	0.107979	1264.34	1.25223
								1278.84	5.73302	1359	0.508553	1341.78	0.372394	1312.48	0.244373
								1320.83	0.170653	1391.18	1.4045	1346	0.275978	1327.72	0.424329
								1384.31	0.871687	1403.4	0.736756	1352.65	0.197721	1354.86	0.375888
								1387.99	0.0923578	1411.84	0.367412	1384.04	2.24468	1357.52	16.589
								1413.29	0.249371	1434.89	0.0372738	1401.42	0.999853	1372.91	1.6046
								1411.56	0.217049	1447.12	0.48076	1409.16	0.131796	1395.78	0.667837
								1434.85	0.40215	1465.66	0.053646	1451.5	0.0154666	1408.9	0.149621
								1450.77	2.88048	1482.57	0.0571403	1482.12	0.365505	1418.46	0.00859349
								1462.54	0.506989	1523.91	6.29464	1469.05	0.0576409	1436.04	0.0241423
								1521.06	0.0240848	1550.23	0.0444104	1529.16	10.8023	1481.27	2.53038
								1541.51	0.174993	1628.39	2.09989	1560.92	0.0132682	1507.81	0.777325
								1546.01	0.0413664	1651.96	0.234975	1592.01	1.95186	1580.75	2.22791
								1581.52	115.357	1708.93	0.0413161	1635.34	1.58572	1610.49	0.111989
								1615.83	59.2418	1726.54	0.140369	1663.13	0.167583	1653.84	0.114529
								1660.14	1.1582	1762.67	0.0488925	1682.66	0.0388227	1670.58	0.0160665
								1691.99	1.11992	1762.28	0.0408532	1698.81	0.0216693	1723.41	0.0679061
								1732.86	0.117573	1766.33	0.0453815	1685.67	0.261753	1706.08	0.0468729
								1747.48	0.102573	1778.19	0.00200337	1675.92	0.000359515	1699.26	0.075838
								1767.16	0.00866946	1788.25	0.697681	1729.55	0.733178	1719.2	0.00149591
								1757.4	0.0970682	1802.05	0.0717663	1720.13	0.0018158	1733.66	0.452369
								1751.1	0.00444066	1812.22	0.00246656	1732.93	0.0968847	1745.27	0.0754077
								1810.47	0.71184	1810.27	0.00181263	1747.04	0.00937973	1749.25	0.0365539
								1812.06	0.00157556	1828.84	0.00275286	1761.39	0.0236367	1746.13	0.000464322
								1814.17	0.137306	1827.23	0.00351442	1744.56	0.0012786	1782.72	0.0101284
								1824.56	0.00921269	1827.09	0.00546344	1754.75	0.0404161	1773.93	0.00273905
								1830.26	0.014335	1831.12	0.0205635	1764.93	0.0668186	1773.66	0.0108482
								1821.49	0.00188018	1832.69	0.132635	1761	0.0039421	1776.56	0.0453616
								1829.52	0.025725	1837.74	0.000299377	1762.11	0.049443	1786.57	0.1081
								1835.42	0.0116644	1847.56	0.129919	1768.26	0.0338018	1784.55	0.0272863
								1830.14	0.000757514	1903.39	0.632132	1790.22	0.144725	1794.86	0.0079085
								1842.23	0.0501593	3227.7	0.00106839	1896.83	3.08789	1846.09	0.206149
								1837.66	0.03507	3234.92	0.00358238	3196.6	0.00619941	3175.32	0.0284139
								1853.99	0.18003	3254.26	0.00742192	3221.42	0.00672514	3158.47	0.00229863
								1961.68	3.14825	3246.18	0.00807309	3199.12	0.0182349	3169.94	0.00375251
								3285.96	0.00341504	3255.26	0.00310174	3211.08	0.0144611	3153.11	0.000206573
								3307.65	0.00719094	3259.84	0.00728363	3204.21	0.015112	3180.24	0.00543026
								3300.58	0.0043711	3299.59	0.0149371	3209.78	0.00878818	3195.01	0.00339345
								3280.83	0.0137722	3315.55	0.019091	3247.88	0.0110055	3225.09	0.00352581
								3291.25	0.0218463	3314.38	0.0548062	3242.19	0.0184927	3236.53	0.0336196
								3304.86	0.011155	3317.78	0.027265	3242.59	0.0175846	3241.93	0.0291664
								3320.08	0.0225006	3333.42	0.00110042	3258.47	0.00317961	3248.51	0.145071
								3329.49	0.016836	3330.66	0.040587	3253.94	0.00319133	3254.81	0.0438244
								3327.01	0.0119838	3335.18	0.00213328	3263.09	0.0232485	3247.44	0.000545554
								3322.09	0.00833172	3338.58	0.042456	3259.23	0.0182521	3249.79	0.0148171
								3343.23	0.00337917	3351.41	0.0356526	3265.54	0.00083755	3261.03	0.0285379
								3344.06	0.00663144	3371.64	0.00588819	3267.16	0.0950988	3267.15	0.0455144
								3358.98	0.0174037	754.924	312.355	3282.58	0.00681451	3276.51	0.000246644
								3352.03	0.0055258	813.288	0.0463155	810.176	0.6708	735.435	0.0181668
								3368.56	0.00369307	830.881	0.104676	813.174	0.548159	783.981	0.177405
								3382.63	0.0979923	903.036	0.0883827	854.712	0.256709	799.36	0.105206
								846.721	0.34158	909.519	0.801498	908.074	0.903391	868.8	0.222065
								862.975	1.08196	995.844	0.528436	938.722	0.397782	874.162	0.43724
								895.424	0.0111373	1033.85	1.14026	952.846	3.55316	949.697	232.2
								940.7	0.0985536	1067.96	0.234595	1080.24	0.0136069	989.1	15.6331
								980.76	1.64318	1125.07	0.267337	1098.7	3.2385	1032.58	0.208559
								1013.24	2.65084	1152.13	0.00515199	1162.82	0.0193106	1076.53	0.483925
								1109.29	0.00808184	1187.17	0.0116812	1145.72	5.10248	1109.51	0.044395
								1150.77	3.41805	1198.99	0.0210119	1156.44	2.00828	1152.6	0.013015
								1209.1	0.11196	1297.18	0.358087	1201.54	59.5196	1155.14	0.0231132
								1179.08	1.90632	1330.81	1.52416	1287.53	0.111687	1262.29	0.160791
								1215.9	18.915	1328.46	0.029597	1324.05	15.9166	1266.65	0.0147131
								1241.23	124.057	1382.02	0.625953	1380.25	110.202	1296.49	0.0982408
								1319.7	0.00427266	1400.89	0.86848	1382.03	132.985	1344.04	0.58154
								1361.41	0.185723	1434.29	1.1618	1385.63	0.341372	1358.52	0.114711
								1424.29	15.1783	1445.77	0.226953	1393.64	3.11091	1384.63	0.566123
								1427.88	125.462	1454.29	0.210716	1424.29	1.74241	1388.14	0.332079
								1453.46	1.33222	1477.16	6.41619	1441.66	0.0479896	1404.68	0.0396342
								1455.67	11.1038	1489.87	0.479946	1449.1	0.836972	1427.46	0.289533
								1476.25	2.1019	1508.74	0.46487	1491.62	0.00398231	1440.22	0.107721
								1491.79	0.136221	1525.29	0.161579	1521.87	0.00469818	1449.07	1.2548
								1503.62	1.62565	1566.21	1.70328	1509.01	0.669378	1467.39	1.53528
								1561.82	0.0114695	1593.21	6.37273	1569.42	8.18977	1511.45	0.454261
								1582.3	0.154351	1670.78	0.0127732	1600.78	1.65491	1539.6	32.2602
								1586.81	1.98979	1694.39	0.0111733	1632.29	0.153801	1611.51	0.0357379
								1623.2	0.327514	1751.89	0.00624998	1675.02	0.119985	1641.52	0.00224285
								1656.58	0.433558	1768.71	0.00180851	1703.02	0.00728807	1684.72	0.0100748
								1700.7	0.146653	1804.38	0.0141904	1722.74	0.0102838	1701.9	0.00430039
								1732.58	0.0602721	1804.73	0.00449085	1738.62	0.00255871	1752.71	0.00854166
								1773.61	0.00223438	1808.74	0.00516786	1726.01	0.0449742	1737.13	0.00294637
								1788.51	0.00719235	1820.76	0.00670083	1716	0.00302082	1730.91	0.00351843
								1808.02	0.000834542	1830.74	0.0280902	1769.67	0.0518532	1750.21	0.0100524
								1798.26	0.0108201	1844.59	0.0413461	1760.08	0.00962298	1764.74	0.0340558
								1791.83	0.000738286	1854.61	0.00410963	1774.56	0.0436563	1776.33	0.0196392
								1851.57	0.0376642	1852.76	0.0109796	1787.17	0.00230334	1780.37	0.0076449
								1852.71	0.00130588	1871.06	0.00243499	1801.32	0.00223913	1776.82	0.0144829
								1855.38	0.0158488	1869.89	0.000576192	1784.59	0.00100426	1813.18	0.00153998
								1865.66	0.00529682	1869.38	0.00437824	1794.28	0.00521456	1805.38	0.000349468
								1871.03	0.00135974	1873.53	0.0102351	1804.82	0.00307433	1804.92	0.00942506
								1862.19	0.0018994	1875.33	0.00169111	1801	0.00188463	1807.78	0.00959194
								1869.86	0.00409512	1880.34	0.0202265	1802.35	0.00738591	1817.77	0.00257628
								1876.15	0.0013306	1889.97	0.00340907	1808.28	0.00690665	1815.8	0.00899906
								1870.77	0.00138034	1945.6	0.137585	1830.58	0.000543433	1826.06	0.00446888
								1882.97	0.00447761	3270.25	0.00175784	1936.77	0.337202	1876.96	0.0340434
								1878.94	0.0114117	3277.25	0.00101506	3236.5	0.0199778	3206.45	0.0142927
								1895.67	0.0147166	3296.85	0.01363	3261.33	6.56392e-05	3189.45	0.00167096
								2002.39	0.138959	3288.7	0.00141577	3239.34	0.112212	3201.01	0.000138189
								3326.57	4.68667e-05	3297.68	0.000292907	3251.07	0.00522193	3184.01	0.00117352
								3348.26	0.000655197	3302.36	0.00202285	3244.54	0.00976338	3211.07	0.00167972
								3341.45	0.0753166	3342.11	0.00961791	3249.65	0.00625282	3226.3	0.0011508
								3321.58	0.00732158	3357.86	0.000509756	3287.79	0.00304712	3255.95	0.000813329
								3332.18	0.0108964	3356.93	2.63945e-05	3281.86	0.00662866	3267.39	0.00608117
								3345.51	0.00435836	3360.24	0.00967539	3282.82	0.0453117	3273.03	0.0134312
								3360.73	0.000335191	3375.83	0.000896099	3298.4	0.0067758	3279.73	0.000942087
								3370.05	0.000547864	3373.26	0.00363972	3293.87	0.0059138	3285.79	0.00172652
								3367.86	0.0268307	3377.7	0.0020848	3303.06	0.00726177	3278.29	0.00506809
								3362.75	0.00447326	3381.12	0.000555428	3299.03	0.0154493	3280.81	0.000441121
								3383.87	0.00685847	3394.15	0.0447393	3305.32	0.00335539	3292.28	0.0231676
								3384.61	0.00350693	3413.97	0.00348515	3307.54	0.320709	3298.88	0.000561365
								3399.38	0.0179377	823.304	0.957607	3322.4	0.00598685	3307.24	0.00762092
								3392.68	0.00536887	841.345	1.00775	841.135	0.747488	816.809	15.7143
								3409.11	0.00471838	913.22	1.90616	883.543	0.918871	832.156	0.860091
								3423.76	0.343835	920.749	0.111676	936.324	6.10397	901.439	1.80939
								898.215	1.1125	1006.7	6.29823	967.157	0.0781638	907.696	0.239281
								930.555	3.62753	1044.2	7.05585	980.554	59.9741	983.586	0.666742
								976.595	0.950243	1079.27	3.82091	1108.75	0.0161025	1022.92	31.9401
								1016.38	0.783512	1134.7	0.149431	1126.79	49.0782	1065.04	5.35126
								1048.35	116.312	1162.9	0.453359	1191.33	0.0136574	1109.41	0.228229
								1144.45	0.0777165	1197.98	0.0988937	1173.09	0.137647	1143.21	0.40715
								1186.62	2.08516	1209.94	0.563875	1184.73	18.4304	1186.36	0.0828344
								1245.06	0.139089	1308.13	0.155274	1229.93	2.91969	1188.91	1.10126
								1214.88	22.7635	1341.95	0.119932	1315.85	0.139025	1295.25	0.393023
								1252.85	48.4654	1339.53	1.4222	1352.35	0.625314	1299.74	0.939007
								1277.27	3.01158	1393.83	7.64444	1410.3	0.686891	1329.29	0.243106
								1354.96	0.840283	1412.13	0.345904	1410.34	4.53977	1377.4	0.326267
								1397.48	2.69199	1444.94	3.05862	1414.28	2.916	1391.83	0.313908
								1460.69	12.5322	1456.27	1.30287	1421.69	3.33707	1417.92	1.81179
								1464.24	2.14298	1464.21	71.7531	1452.45	0.188387	1420.78	3.36221
								1489.8	6.68381	1487.99	0.237814	1470.12	0.220111	1438.05	38.6903
								1489.77	7.00087	1501.64	5.4426	1477.23	0.00270008	1460.15	90.7326
								1511.82	0.704964	1519.73	0.953377	1519.88	0.067594	1473.49	3.23899
								1527.69	0.473854	1536.34	0.451	1550.54	0.120842	1483.4	2.41337
								1538.87	0.00711041	1576.64	116.101	1537.26	0.014723	1500.45	0.563831
								1597.41	0.00875986	1603.9	24.2203	1597.04	0.482372	1544.59	2.74355
								1617.52	0.148909	1681.19	0.102594	1628.56	0.282426	1572.43	26.3768
								1622.42	0.0278531	1705.2	0.483116	1660.85	0.351965	1644.2	0.0866906
								1657.62	0.663362	1762.18	0.0067884	1703.41	0.00843601	1674.77	0.498535
								1691.14	0.349922	1779.18	0.118267	1731.12	0.00145164	1717.68	0.0125346
								1736.43	0.392292	1815.28	0.0515863	1751.17	0.0296581	1734.85	0.0809269
								1768.25	0.0148926	1815.83	0.0121514	1767.65	0.0164161	1785.97	0.0646558
								1808.93	0.00221225	1819.5	0.00480712	1753.8	0.0218344	1770.83	0.0232714
								1823.99	0.0487344	1831.64	0.00849767	1744.35	0.00103864	1763.76	0.00923518
								1843.95	0.0153388	1842.13	0.104045	1797.66	0.0283674	1783.23	0.00368363
								1833.51	0.033306	1855.67	0.992124	1788.47	0.000669475	1797.73	0.243583
								1827.13	0.00206272	1865.25	0.0026431	1800.52	0.00444688	1810.39	0.972969
								1886.69	0.0500956	1864.09	0.0556158	1814.58	0.0297856	1814.67	0.067496
								1888.41	0.00263833	1881.92	0.00151911	1829.57	0.00353505	1809.83	0.00236021
								1889.63	0.00871559	1880.1	0.0119844	1812.83	0.00138561	1846.4	0.00956904
								1900.25	0.0372184	1879.84	0.0204613	1822.89	0.00364022	1838.8	0.0292103
								1906.28	0.00358569	1884.3	0.109437	1832.96	0.00120342	1837.19	0.0955359
								1897.78	0.000179859	1886.19	0.0711248	1829.22	0.00131999	1840.72	0.198083
								1905.58	0.00289287	1890.88	0.145983	1830.27	0.00587981	1851.37	0.120162
								1911.54	0.00310983	1900.43	0.250998	1835.54	6.68108e-05	1849.46	0.106081
								1906.45	0.000180443	1956.31	2.06562	1858.36	0.0977137	1860.54	0.101448
								1918.57	0.0112892	3281.13	0.00141568	1965.09	0.0144656	1909.85	1.97353
								1912.85	0.00230212	3288.2	0.00773723	3264.77	0.00139406	3239.51	0.0787223
								1930.72	0.0914881	3307.84	0.0418513	3289.63	0.0025546	3222.49	0.00436107
								2038.05	0.0247953	3299.51	0.00518805	3267.58	0.00220735	3234.04	0.00728482
								3362.16	0.00295571	3308.27	0.0189935	3279.38	0.00148025	3217.2	0.00440962
								3383.85	0.0034124	3313.19	0.00630389	3272.71	0.0224709	3243.78	0.0230225
								3376.98	0.000625431	3352.96	0.0104956	3278.21	0.0117197	3259.36	0.00524247
								3357.14	0.00385887	3369.24	0.0161646	3315.94	0.0297751	3290.13	0.01435
								3367.58	0.0218265	3367.85	0.00709741	3309.88	0.00876046	3300.39	0.0128217
								3381.61	0.0118172	3371.01	0.0153399	3311.03	0.00270469	3306.36	0.0383093
								3396.21	0.0619316	3387.2	0.018795	3326.59	0.00257221	3312.82	0.00329038
								3405.58	0.00544185	3384.33	0.0084809	3322.14	0.022553	3318.83	0.0122567
								3403.47	0.00972401	3388.48	0.00488419	3330.99	0.0442316	3311.5	0.00595884
								3398.32	0.0191098	3392.16	0.00536727	3327.14	0.0199258	3314.14	0.0257466
								3419.41	0.00145359	3404.72	0.13303	3333.68	0.00730605	3324.75	0.150265
								3420.15	0.0257314	3425.11	0.00472961	3335.72	0.00691363	3332.07	0.00096955
								3434.64	0.0417098	900.961	1.202	3350.7	0.00284261	3340.63	0.00567279
								3427.73	0.0323309	972.947	8.44135	886.746	2.68905	880.064	0.910836
								3444.76	0.00164941	981.429	67.504	940.524	23.6772	949.711	147.028
								3459.12	0.0216735	1066.01	2.16866	969.856	5.3178	955.324	25.879
								946.261	2.73109	1103	0.709767	984.337	1.7096	1031.15	0.160574
								992.609	0.436452	1138.82	0.289963	1110.83	0.110235	1070.48	0.247346
								1031.99	24.4193	1195.96	0.0674003	1130.42	2.90669	1113.6	0.0612765
								1064.58	1.36227	1222.46	1.01912	1194.09	0.133811	1157.63	0.0754805
								1160.69	0.0468709	1258.4	5.59127	1176.54	20.9736	1190.49	0.776788
								1201.92	1.83759	1269.37	0.0547649	1189.46	442.797	1234.39	0.0816871
								1260.36	0.431502	1367.51	2.08048	1233.14	2.78669	1236.22	0.0998682
								1231.32	0.445059	1400.85	0.653722	1318.57	9.10798	1343.04	5.9318
								1268	30.7753	1399.4	0.934082	1354.71	0.337341	1347.56	0.60308
								1293.21	0.238134	1452.74	1.17405	1413.48	66.9728	1377.69	5.48868
								1370.98	0.172194	1470.92	8.20877	1414.02	6.214	1424.97	1.81049
								1412.84	0.935132	1505.25	12.0482	1417.22	0.804915	1440.84	22.1084
								1475.88	4.15097	1516.67	3.31276	1424.06	2.4599	1465.95	17.9798
								1480.28	1.40036	1524.22	23.7228	1455.44	0.419613	1469.39	4.65119
								1505.44	0.266937	1548.2	0.0839696	1473.06	0.0831175	1486.13	0.0993149
								1503.87	2.0645	1560.18	0.188836	1480.23	0.291033	1508.95	0.107418
								1527.67	0.341904	1578.8	0.0306153	1522.88	0.014139	1521.38	0.268126
								1543.05	0.133956	1595.73	0.0579846	1553.35	15.3085	1530.69	0.046299
								1554.82	0.152396	1635.57	0.731738	1540.26	1.86106	1548.26	0.0634319
								1613.04	0.0204179	1662.54	0.679421	1599.64	0.512872	1591.68	0.519431
								1633.87	0.768059	1740.72	0.428939	1630.02	1.0565	1619.55	0.49123
								1638.08	0.145841	1764.65	0.0503455	1663.97	0.046492	1692.36	0.391195
								1673.42	0.317121	1821.97	0.00723675	1706.55	0.0429091	1722.25	0.049403
								1705.85	0.295492	1839.6	0.0372477	1734.3	0.0176668	1766.04	0.0135976
								1752.29	0.00289611	1875.41	0.0100731	1754.06	0.0268238	1783.62	0.050531
								1784.29	0.0278615	1875.34	0.0199792	1770.31	0.0223441	1834.67	0.0144406
								1824.97	0.00670565	1879.03	0.0136426	1757.1	0.0203512	1818.67	0.0265303
								1839.95	0.00619496	1891.31	0.00173037	1747.51	0.00279162	1811.97	0.00499006
								1859.26	0.00329934	1901.41	0.105392	1800.68	0.011134	1831.41	0.00587686
								1849.19	0.00769975	1914.82	0.156759	1791.52	0.00721345	1845.02	0.0552192
								1843.25	0.00287648	1925.11	0.00291581	1803.69	0.00551999	1857.36	0.117778
								1902.46	0.0159468	1922.6	0.111975	1817.76	0.00738516	1861.11	0.133489
								1904.14	0.00728772	1941.37	0.0122793	1832.61	0.00207036	1858.18	0.00353446
								1905.93	0.00995181	1940.33	0.00186071	1815.95	0.00105742	1894.69	0.00908701
								1917.05	0.000850695	1939.79	0.0118601	1826.03	0.00029955	1886.59	0.00625999
								1922.38	0.000634276	1943.82	0.0387039	1835.88	0.00604227	1885.68	0.0379602
								1913.45	0.000275147	1945.72	0.0274172	1832.06	0.00203721	1888.45	0.0426116
								1921.48	1.60906e-05	1950.2	0.0450437	1833.38	0.00377089	1898.9	0.047078
								1927.49	0.0019077	1961.05	0.102695	1838.47	0.00447315	1896.84	0.02483
								1922.09	0.00191812	2016.16	0.0586342	1862.1	0.121613	1908.3	0.0571973
								1934.37	0.00150291	3340.68	0.0039581	1967.86	0.0907263	1958.12	0.0230839
								1929.35	0.00157313	3347.68	0.00228361	3267.92	0.00817544	3287.48	0.0307111
								1948.06	0.0439028	3367.35	0.0188273	3292.78	0.00386066	3270.53	0.00475693
								2053.36	0.0672099	3359.13	0.00630825	3270.72	0.00860125	3281.98	0.00239324
								3377.84	0.00124008	3367.88	0.0165401	3282.62	0.00223729	3265.15	0.00680628
								3399.6	0.00155341	3373.09	0.0116237	3276.22	0.00475867	3291.78	0.0148011
								3392.57	0.0016211	3412.48	0.0348706	3281.24	0.00865268	3307.55	0.0199583
								3372.74	0.0124367	3428.39	0.0070246	3319.14	0.0234996	3337.49	0.0231354
								3383.59	0.0007278	3427.32	0.0221835	3313.04	0.00373259	3348.27	0.0339583
								3396.8	0.00167743	3430.78	0.0131849	3314.2	0.0168208	3354.33	0.036602
								3411.97	0.00711784	3446.3	0.0403529	3329.73	0.0056582	3360.72	0.0138296
								3421.32	0.00880018	3443.52	0.0563457	3325.3	0.0354997	3366.38	0.11479
								3419.26	0.00978496	3448.1	0.00326385	3334.23	0.0642268	3359.44	0.00615159
								3414.15	0.00429608	3451.29	0.0724378	3330.33	0.00610501	3361.9	0.0171852
								3434.97	0.00793656	3464.38	0.0482805	3336.9	0.00576244	3373.11	0.0309215
								3435.88	0.0110463	3484.61	0.00319633	3338.83	0.0345599	3379.8	0.0189365
								3450.4	0.000854338	990.792	3.50902	3353.9	0.00390613	3388.58	0.00321857
								3443.78	0.00553975	997.863	6.51783	982.105	1.26551	965.803	0.823857
								3460.32	0.00650369	1083.71	0.337338	1012.82	99.3565	971.888	3.20291
								3474.83	0.0237386	1120.77	1.02692	1026.32	0.463811	1047.79	0.723464
								1024.61	2.04186	1155.88	0.603472	1154.24	0.26049	1086.44	0.567915
								1064.51	2.69772	1213	0.51627	1171.83	119.924	1129.62	0.00195853
								1096.63	0.400421	1240.07	0.349883	1236.64	15.0758	1173.63	0.241088
								1193.18	0.137763	1274.64	0.0286383	1218.17	0.340092	1207.09	0.360231
								1233.94	18.37	1286.68	0.267387	1230.85	1.89683	1249.48	0.0913308
								1292.92	6.03169	1384.7	0.447878	1275.86	2.97395	1251.97	0.291403
								1263.12	0.575029	1418.69	33.4652	1361.59	1.5384	1359.25	7.96928
								1300.51	1.46923	1415.71	1.46212	1398.37	0.882178	1363.17	0.745385
								1325.81	0.734728	1470.08	0.644673	1456.64	4.67396	1393.79	21.6041
								1404.06	8.12832	1488.96	0.650816	1455.74	0.664012	1441.11	13.2994
								1445.9	54.8726	1525.08	3.77951	1459.71	0.664275	1456.02	9.81525
								1508.68	3.62927	1535.27	82.0665	1466.07	0.0214207	1483.95	68.7051
								1512.45	1.2658	1542.21	1.5139	1497.94	0.101299	1487.1	3.36903
								1538.03	1.45164	1564.94	0.387122	1515.41	0.0304731	1501.64	0.806673
								1536.32	0.671442	1577.57	2.65235	1522.8	0.0252015	1524.42	0.233654
								1560.19	0.664183	1596.19	0.0799205	1565.44	0.0169181	1537.26	2.18345
								1575.37	0.0890859	1612.95	0.0284099	1595.57	1.53589	1546.7	0.0963837
								1587.28	0.586564	1653.66	0.304144	1582.77	0.0420189	1563.95	0.0302413
								1645.52	0.0142386	1680.42	0.021971	1643.55	0.00832996	1608.24	0.345029
								1666.01	0.920307	1758.55	0.0241913	1673.97	0.2379	1635.84	0.0185237
								1670.53	0.0515811	1782.27	0.00542964	1706.21	0.072533	1708.53	0.0220949
								1705.87	0.0150519	1838.98	0.00160869	1748.79	0.04016	1738.66	0.00733468
								1739.84	0.277598	1856.17	0.0112111	1776.76	0.0165009	1781.4	0.00188241
								1784.6	0.0589844	1891.64	0.0100816	1796.51	0.0729457	1798.49	0.0144515
								1816.45	0.0486671	1892.76	0.0262225	1812.87	0.041825	1849.82	0.0142534
								1857.18	0.0150295	1896.57	0.00528233	1799.39	0.0466586	1834.57	0.0278178
								1872.22	0.112628	1908.68	0.0205209	1789.91	0.0173697	1826.9	0.00709245
								1891.71	0.00919992	1917.87	0.0110452	1842.9	0.124789	1847.46	0.0336331
								1881.64	0.039271	1931.71	0.00942865	1833.93	0.00604492	1861.3	0.0129352
								1875.22	0.00711557	1942.18	0.0122233	1845.52	0.0196012	1872.53	0.00489751
								1934.03	0.124336	1940.08	0.00572694	1859.65	0.000895574	1876.53	0.00701084
								1936.55	0.00576161	1958.66	0.00112669	1875.31	0.00438825	1873.87	0.0126034
								1938.02	0.0334412	1957.66	0.00642147	1858.33	0.00114455	1910.1	0.00251469
								1949.1	0.00293236	1956.99	0.0379247	1868.6	0.0150991	1902.49	0.00894582
								1954.92	0.00209389	1960.91	0.00102507	1878.52	0.00669247	1901.49	0.0396146
								1945.82	0.00142178	1962.96	0.00738059	1874.74	0.00956853	1904.47	0.00131609
								1954	0.0113634	1967.58	0.00119939	1875.45	0.00812083	1914.62	0.00710259
								1959.82	0.00705066	1976.52	0.057806	1881.29	0.0233264	1911.38	0.00477786
								1954.45	0.0082245	2033.16	0.0275935	1903.24	0.0304807	1923.13	0.0708885
								1966.43	0.0217778	3357.88	0.00445525	2010.41	0.586626	1973.7	0.0237494
								1961.47	0.0167693	3364.87	0.00342587	3310.27	0.0051299	3303.44	0.00631428
								1979.17	0.0223612	3384.5	0.00416497	3335.19	0.00163859	3286.44	0.00468455
								2085.91	0.682881	3376.29	0.00511597	3313.14	0.0184534	3297.79	0.00556109
								3410.3	0.00226706	3385.31	0.0042091	3324.85	0.00123703	3280.97	0.00323578
								3431.87	0.000844316	3389.99	0.00187102	3318.37	0.0205986	3307.96	0.00409295
								3425.03	0.0150124	3429.7	0.0187316	3323.81	0.0150053	3323.23	0.00215558
								3405.19	0.00137058	3445.41	0.0195689	3361.6	0.0176478	3352.75	0.00736264
								3416.05	0.0211539	3444.52	0.0562716	3355.15	0.0383088	3364.34	0.0145965
								3429.58	0.0112225	3448.05	0.0144515	3356.55	0.0119786	3369.97	0.0228407
								3444.46	0.00361076	3463.31	0.00598052	3372.02	0.0029628	3376.51	0.090059
								3453.53	0.0659648	3460.97	0.0143891	3367.51	0.102499	3382.76	0.026131
								3451.76	0.0194863	3465.23	0.00404183	3376.73	0.043215	3375.23	0.00352713
								3446.45	0.0341421	3468.84	0.00366828	3372.48	0.0185075	3377.6	0.00353365
								3467.45	0.00206135	3481.64	0.023918	3379.12	0.0155981	3389.26	0.0156493
								3468.17	0.0192831	3501.88	0.00780936	3381.19	0.0551541	3395.92	0.00615193
								3482.7	0.0316591	1069.31	0.0505134	3396.3	0.00844182	3404.45	0.0116883
								3476.3	0.0478661	1155.91	0.167238	1065.16	2.64601	1040.54	0.205872
								3492.88	0.00427538	1192.66	0.246491	1079.65	0.150138	1117.52	0.144031
								3507.26	0.0642768	1227.93	0.533322	1206.18	60.7759	1155.79	0.23912
								1110.57	3.36204	1285.04	0.119532	1226.04	5.94154	1198.94	0.593744
								1143.06	0.13297	1312.07	2.44516	1290.78	8.559	1242.62	0.273384
								1239.54	34.3352	1347.42	1.50645	1271.82	3.1206	1275.61	2.17344
								1280.69	2.40281	1359.03	0.73219	1283.96	0.152631	1319.97	2.44085
								1339.3	2.34083	1456.69	4.12237	1328.58	5.84103	1321.68	0.499141
								1309.22	1.81859	1489.93	6.05312	1413.4	8.04718	1428.03	23.9027
								1346.79	0.0142681	1488.7	0.341215	1450.72	5.87534	1433.25	0.428141
								1373.18	20.0366	1542.91	17.9887	1510.17	1.43799	1461.87	5.79586
								1448.71	107.188	1561.25	0.122537	1508.86	2.05772	1510.83	1.31172
								1491.93	9.43752	1596.85	2.65863	1511.95	19.7485	1525.57	1.77625
								1553.79	24.277	1606.94	57.4345	1518.87	30.8185	1552.88	1.11491
								1558.66	4.19398	1614.38	4.56935	1550.5	25.2375	1556.41	0.643925
								1584.41	1.20216	1637.3	5.21332	1568.46	0.0270811	1571.45	1.38691
								1582.57	13.6299	1649.63	0.00466424	1575.63	0.00277199	1594.32	4.95549
								1604.94	440.807	1668.01	0.00290289	1618.23	0.00807394	1606.84	0.000917829
								1622.15	203.991	1685.02	0.0456597	1648.33	1.82391	1616.11	0.00612425
								1632.81	1.4993	1725.26	0.121578	1635.67	0.0384474	1633.69	0.0653773
								1691.3	0.00068296	1752.39	1.38676	1695.25	0.816207	1677.35	0.30411
								1711.73	0.699749	1830.13	0.0156049	1727.14	1.27617	1705.15	0.987644
								1716.48	0.0262348	1853.76	0.103329	1758.11	0.0708322	1777.68	0.00527378
								1751.14	0.935349	1911.39	0.00353392	1801.35	0.366153	1807.68	0.0506466
								1785.72	0.835208	1928.41	0.0161969	1829.4	0.0172008	1851.15	0.00354716
								1829.78	0.0455179	1964.91	0.0184185	1849.76	0.0550972	1868.62	0.0287776
								1861.97	0.28199	1964.73	0.00933706	1865.96	0.0297887	1920.18	0.0134097
								1901.57	0.0102922	1968.67	0.0135545	1853.42	0.136061	1904.16	0.00975105
								1918.02	0.0361517	1980.53	0.0108004	1842.74	0.0035593	1897.56	0.00958956
								1937.96	0.027749	1989.6	0.321793	1895.73	0.0396717	1916.78	0.0025138
								1927.71	0.113141	2003.02	0.584239	1886.87	0.00266792	1931.25	0.103662
								1921.61	0.0120147	2014.49	0.000839748	1898.55	0.0847763	1941.35	0.474513
								1980.63	0.0142808	2012.46	0.0780993	1912.47	0.0354491	1946.44	0.136358
								1982.37	0.00277089	2030.96	0.00265804	1928.44	0.0105582	1943.74	0.0035612
								1983.31	0.143629	2029.68	0.00468571	1911.22	4.95746e-05	1980.01	0.00423373
								1994.35	0.0399389	2029.22	0.0085142	1921.34	0.00127026	1972.24	0.00328822
								2000.92	0.00936387	2033.14	0.141281	1930.92	0.0264693	1971.23	0.048658
								1991.81	7.50686e-05	2034.71	0.0505626	1927.66	0.00115612	1974.04	0.126359
								1999.83	0.00145119	2039	0.0968283	1928.08	0.0154707	1983.9	0.032951
								2005.43	0.0727199	2048.12	0.0268492	1933.67	0.121646	1981.88	0.0245102
								2000.47	0.000339218	2104.53	0.0169995	1955.49	0.385936	1991.99	0.00442416
								2011.7	0.0918999	3429.93	0.0047379	2064.14	0.44867	2042.84	0.056949
								2006.84	0.0988311	3436.99	0.00236314	3363.11	0.0011302	3373.34	0.118099
								2024.66	0.205474	3456.76	0.0712605	3387.88	0.00821382	3355.97	0.00347382
								2132.47	0.345328	3448.48	0.00861425	3365.75	0.0521598	3367.44	0.00243819
								3456.13	0.00407965	3457.16	0.0231932	3377.62	0.0159649	3350.62	0.0146483
								3477.8	0.00217592	3462.21	0.0049416	3370.96	0.0569047	3377.26	0.0117109
								3470.79	0.0131208	3501.66	0.0512303	3376.31	0.0163635	3392.99	0.00234291
								3451.07	0.00877729	3517.56	0.0239734	3414.25	0.033483	3422.22	0.0420321
								3461.49	0.0651228	3516.65	0.00300157	3408.38	0.015543	3433.8	0.0235245
								3475.09	0.0192077	3520.01	0.0328172	3409.11	0.0392866	3439.91	0.066707
								3490.17	0.0500036	3535.47	0.0182886	3424.97	0.000732611	3446.16	0.015942
								3499.63	0.00994758	3532.9	0.0198921	3420.42	0.0137367	3452.18	0.0497536
								3497.3	0.0160355	3537.5	0.00269823	3429.42	0.0152919	3444.93	0.00220892
								3492.23	0.0116123	3540.87	0.0108331	3425.58	0.0078098	3447.16	0.008164
								3513.48	0.000240308	3554.36	0.128124	3431.8	0.0131141	3458.99	0.0904555
								3514.05	0.0161912	3573.92	0.00577028	3434.04	0.198029	3465.3	0.00756709
								3529.01	0.0123409	1162.52	0.103166	3449.14	0.00303651	3473.96	0.00648504
								3522.11	0.00472784	1199.45	0.231356	1109.43	0.114137	1122.72	0.18513
								3538.85	0.000608051	1232.44	18.3178	1237.15	1.41003	1161.2	0.18843
								3553.25	0.153925	1291.41	0.502081	1255.73	0.769416	1204.73	0.730657
								1182.38	1.02769	1318.35	0.585492	1319.2	0.116686	1248.1	0.263765
								1278.89	6.38796	1353.43	3.81328	1300.27	0.363507	1282.34	1.39558
								1319.71	3.2843	1365.59	0.177829	1313.32	0.267578	1324.49	0.598261
								1378.25	0.143794	1463.42	0.0226429	1358.7	1.77302	1327.22	0.474506
								1349.16	0.256166	1495.77	5.9658	1444.99	1.11037	1433.29	7.43941
								1386.1	0.26485	1495.34	0.816106	1480.97	0.817005	1438.77	3.8911
								1411.24	1.58421	1549.4	1.30781	1539.38	0.802644	1468.02	23.357
								1489.56	3.45701	1567.96	6.08758	1538.45	6.46983	1516.39	0.375771
								1530.95	0.986297	1601.7	33.5614	1542.63	50.4266	1530.97	8.05225
								1593.93	215.077	1613.26	30.2637	1550.11	0.343078	1558.19	363.029
								1598.7	399.398	1621.15	1.13506	1581.03	0.0788124	1561.19	35.5867
								1623.2	3.11991	1643.82	0.0631281	1598.52	2.6442	1576.84	0.385176
								1622.19	23.7464	1656.43	0.00976276	1605.88	0.0100594	1599.54	0.0536478
								1645.7	0.103635	1674.8	0.00572955	1648.56	0.00632994	1612.33	0.0303964
								1661.12	1.28376	1691.71	0.0472766	1678.88	0.0702513	1621.5	0.0095683
								1672.51	0.0121815	1732.55	0.0450334	1665.91	0.228472	1639.05	0.0248282
								1731.31	0.003764	1761.21	0.213858	1725.71	0.227828	1683.2	0.0680577
								1751.8	0.0176742	1836.95	0.0286696	1756.19	0.156829	1710.92	0.460748
								1756.31	0.225203	1860.79	0.0955245	1789.54	0.0312685	1783.03	0.0449444
								1791.66	0.292437	1918.25	0.0172342	1832.25	0.0220249	1813.18	0.122662
								1824.07	0.110794	1935.34	0.0873975	1859.93	0.0130442	1856.76	0.0277236
								1870.23	0.0623282	1970.88	0.0252456	1879.64	0.0266104	1873.96	0.0716785
								1902.27	0.0147986	1971.14	0.0381163	1895.81	0.0226172	1925.11	0.0349117
								1942.83	0.00796092	1975.11	0.00296656	1882.26	0.017892	1909.27	0.0530073
								1957.89	0.0425962	1987.2	0.00770175	1873	0.00224431	1902.73	0.00252791
								1977.3	0.00695102	1996.3	0.244975	1926.28	0.0559718	1922.17	0.014174
								1967.16	0.0151663	2009.81	0.228329	1917.02	0.00307129	1936.09	0.237089
								1961.17	0.00219929	2021.1	0.00487161	1929.41	0.00460858	1947.32	0.32323
								2020.29	0.162531	2019.63	0.0314671	1943.05	0.152358	1951.45	0.0313805
								2022.32	0.0122183	2037.64	0.0067447	1958.17	0.00178181	1949.13	0.00533168
								2023.76	0.0325579	2036.68	0.0173894	1941.42	0.00337058	1985.32	0.0113216
								2034.67	0.15808	2035.9	0.00935318	1951.57	0.004601	1977.7	0.0252247
								2040.38	0.000529085	2040.04	0.0271158	1961.4	0.0142191	1976.62	0.00595217
								2031.7	0.00312822	2041.54	0.0348425	1957.79	0.00446929	1979.58	0.128382
								2039.5	0.00633178	2046.2	0.0391234	1958.57	0.0358178	1989.57	0.0676794
								2045.19	0.0555965	2056.09	0.00808101	1964.33	0.0107826	1987.93	0.0265038
								2040.19	0.00712789	2110.91	0.753447	1986.96	0.277025	1997.5	0.00504544
								2052.03	0.0610698	3436.7	0.00300307	2092.66	0.00838785	2047.67	0.704529
								2047.64	0.00832545	3443.55	0.0052686	3393.14	0.0258105	3378.53	0.000505599
								2065.38	0.188579	3463.26	0.00732051	3418.2	0.0047884	3361.48	0.00519017
								2170.45	0.00824745	3455.09	0.00734302	3396.19	0.0760654	3372.76	0.00437207
								3495.94	0.0022224	3464.05	0.0467744	3408.01	0.00123034	3356.01	0.00312759
								3517.59	0.00129543	3468.7	0.020435	3401.6	0.010466	3382.92	0.062898
								3510.64	0.0135183	3508.59	0.0113837	3406.59	0.00853787	3398.08	0.024105
								3490.8	0.0673816	3524.39	0.0171444	3444.55	0.00727141	3428.23	0.0043852
								3501.72	0.00747617	3523.18	0.0825338	3438.47	0.0136031	3439.38	0.025376
								3514.95	0.00566766	3526.74	0.0220213	3439.61	0.0350398	3445.24	0.0264009
								3530.07	0.00625189	3542.43	0.00293281	3454.88	0.0106637	3451.46	0.0797333
								3539.35	0.0182414	3539.5	0.0104496	3450.68	0.0258086	3457.65	0.0110345
								3537.34	0.0370387	3544.05	0.00320913	3459.59	0.0149754	3450.29	0.00268235
								3532.18	0.00561654	3547.41	0.0196186	3455.78	0.00241722	3452.74	0.00551786
								3552.96	0.0097175	3560.49	0.00481057	3462.23	0.0017012	3464.04	0.0306013
								3553.86	0.00469301	3580.58	0.0044699	3464.55	0.0277425	3470.5	0.0131702
								3568.63	0.00430096	1285.72	0.184124	3479.16	0.010734	3479.38	0.00185447
								3561.7	0.0038437	1320.84	4.69686	1251.06	0.135921	1237.5	0.045742
								3578.37	0.0120769	1378.28	0.154121	1270.3	0.502002	1280.56	6.43586
								3593.23	0.0391143	1405.43	0.238536	1333.13	15.7696	1324.69	0.163148
								1310.48	0.177713	1439.66	1.01804	1315.53	3.81481	1358.01	0.162711
								1352.26	0.0720695	1451.58	0.16418	1328.4	0.0428484	1400.69	0.659522
								1410.29	26.5819	1550.48	4.49299	1372.33	18.7192	1402.99	0.132347
								1381.45	2.37206	1583.14	153.025	1458.99	0.500928	1510.62	0.843408
								1419.07	0.0155987	1581.63	26.7276	1495.49	0.207285	1515.15	0.272672
								1443.06	18.5072	1635.69	3.05316	1554.21	23.9578	1543.97	348.655
								1521.76	0.401189	1654.51	6.82866	1553.59	55.5563	1592.74	2.2107
								1563.46	0.126964	1687.79	1.99824	1557.04	10.0919	1607.77	8.02238
								1626.81	14.1815	1699.48	0.369162	1563.76	2.16757	1633.48	2.5507
								1630.65	3.05986	1706.98	1.15693	1594.74	0.0751397	1637.02	0.421475
								1655.91	0.940843	1729.87	0.0926811	1612.31	0.29511	1652.61	0.342658
								1655.7	2.4118	1742.43	0.00649863	1619.74	0.0346801	1675.45	0.0785479
								1677.9	0.202425	1761.09	0.000257701	1662.57	0.000964737	1688.18	0.0140174
								1693.09	0.19962	1778.06	0.00620455	1692.84	0.0165766	1697.78	0.000275159
								1705.09	0.0831339	1818.57	0.0143889	1680.07	0.0105076	1715.36	0.00336814
								1763.39	0.000173612	1844.7	0.300227	1740.05	0.0239604	1759.29	0.00683152
								1784.07	0.00776136	1922.68	0.0129351	1771.18	0.0665767	1786.69	0.184488
								1788.51	0.00392924	1946.51	0.142969	1802.7	0.0256093	1858.75	0.0120868
								1824.3	0.00224487	2004.3	0.0272924	1845.22	0.0661772	1888.81	0.138876
								1857.68	0.0506546	2021.13	0.0652486	1873.73	0.0440108	1932.71	0.0235573
								1901.78	0.0163646	2057.16	0.0312164	1893.91	0.0284948	1949.83	0.0543184
								1933.76	0.0515544	2057.66	0.0299253	1909.92	0.04526	2001.2	0.032641
								1974.99	0.0377161	2061.67	0.0636681	1897.02	0.13088	1985.81	0.0551325
								1990.32	0.0456616	2073.6	0.00196934	1887.03	0.0275505	1979.17	0.0549132
								2009.66	0.0191631	2081.79	0.0691247	1939.5	0.0702785	1998.57	0.001672
								1999.51	0.0861786	2096.43	0.21767	1931.28	0.00108708	2012.01	0.0927425
								1993.56	0.0406904	2107.58	0.00109246	1943.05	0.00770853	2023.33	0.145084
								2052.17	0.0529731	2105.06	0.111844	1957.34	0.0162257	2027.84	0.109718
								2054.41	0.000931265	2124.01	0.00394625	1972.6	0.00171446	2025.44	0.000508838
								2055.52	0.0031116	2122.84	0.00921657	1955.67	0.00019065	2061.58	0.00431357
								2067.07	0.0149267	2122.28	4.27083e-05	1965.83	0.0124542	2053.83	0.0133254
								2073.07	0.00149917	2126.01	0.0446707	1975.03	0.0393558	2052.9	0.00180565
								2063.97	8.7559e-06	2127.82	0.0538519	1971.89	0.0105432	2055.53	0.0370487
								2071.98	0.00974481	2132.38	0.010472	1972.3	0.0562581	2065.54	0.0278586
								2077.15	0.0195296	2141.5	0.147484	1978.31	0.00644504	2063.61	0.0250223
								2072.54	0.0053773	2196.41	0.820956	1999.51	0.0285816	2073.08	0.0957547
								2084.04	0.0448739	3522.96	0.00191697	2105.25	0.221477	2123.09	0.615654
								2079.11	0.0512591	3529.91	0.00125744	3407.6	0.000484872	3454.87	0.00947977
								2097.06	0.0121093	3549.61	0.0137248	3432.42	0.000576497	3437.77	0.00255047
								2201.74	0.189589	3541.57	0.000122186	3410.24	0.013152	3448.99	0.00132058
								3528.24	0.000887243	3550.38	0.000158458	3422.05	0.000266337	3432.4	6.41345e-05
								3549.8	0.000413797	3555	0.00138466	3415.81	0.000446368	3459.25	0.00109235
								3542.95	0.00879253	3594.79	0.0364508	3420.64	0.0035642	3474.4	0.00147363
								3523.22	0.00512182	3610.61	0.00557789	3458.88	0.0274164	3504.31	0.00170972
								3534.02	0.000310853	3609.58	0.0403075	3452.6	0.00973322	3515.71	0.0291807
								3547.08	0.00273977	3613.3	0.0647271	3453.66	0.0830218	3521.45	0.0574639
								3562.35	0.0293957	3628.56	0.00363654	3469.48	0.000376118	3527.74	0.0578241
								3571.64	0.0220197	3626.1	0.0122945	3464.66	0.0433557	3534.38	0.0270064
								3569.87	0.0826561	3630.6	3.41515e-05	3474.24	0.00874951	3526.73	0.000510912
								3564.2	0.0262051	3634.04	0.00400663	3469.78	0.00490433	3528.86	0.000851079
								3585.64	3.41792e-05	3646.57	0.00555767	3476.27	0.00784234	3540.46	0.0186221
								3586.19	0.00526804	3667.04	0.000230223	3478.15	0.00495511	3547.01	0.00778303
								3600.85	0.00517622	1357.88	2.47348	3493.63	0.00041514	3555.81	0.000115369
								3594.36	0.00281703	1413.68	2.13383	1397.82	0.275857	1319.08	1.1544
								3611	6.24318e-05	1441.04	17.6818	1464.7	22.8297	1361.64	2.46424
								3624.98	0.00266766	1477.19	0.11	1443.95	2.24265	1397.03	4.00717
								1448.95	7.06835	1487.4	179.615	1455.98	2.47288	1439.91	0.362876
								1507.2	3.81098	1587.24	82.4302	1500.07	6.96458	1442.21	6.8528
								1479.21	2.61702	1621.37	21.6412	1586.29	2.18146	1549.71	1.01965
								1515.45	0.543278	1617.8	4.69523	1622.61	0.913372	1552.81	1.95188
								1539.98	6.18537	1672.41	2.62288	1680.58	4.78508	1583.7	17.295
								1617.88	2.84075	1691.46	7.84587	1680.42	6.99905	1631.7	1.33285
								1658.78	0.840825	1724.63	0.0448966	1684.17	2.61102	1646.27	5.42938
								1722.96	7.3448	1735.82	0.209553	1690.89	0.149898	1672.06	0.408149
								1727.04	2.56206	1744.47	1.50279	1722.44	0.682693	1675.54	0.149831
								1751.57	0.18416	1767.36	0.299435	1740.06	0.0333071	1692.08	0.607125
								1750.74	1.71685	1780.02	0.0160704	1747.26	0.0144292	1714.81	0.27804
								1774.14	1.55425	1798.25	0.0142383	1790.28	0.000914519	1727.62	0.00200453
								1789.69	0.0534091	1815.16	0.249328	1819.87	0.218421	1736.86	0.0127093
								1801.39	0.0536861	1856.11	0.156405	1807.71	0.0103041	1754.28	0.274579
								1859.91	0.00125158	1882.94	2.44656	1867.17	0.136005	1798.7	0.052662
								1879.96	0.153711	1959.59	0.0896202	1898.51	1.65343	1826.51	1.83469
								1885.01	0.00402261	1984.03	0.272107	1930.67	0.569797	1897.51	0.0613296
								1919.62	0.297924	2041.88	0.00234144	1973.31	0.645729	1928.57	0.2052
								1953.43	1.47121	2058.78	0.00389716	2001.35	0.0669485	1972.08	0.00341342
								1998.6	0.5649	2094.52	0.0628484	2021.22	0.104057	1989.23	0.0198068
								2030.54	0.528978	2094.63	0.043181	2037.61	0.00286454	2040.12	0.0439408
								2071.5	0.060244	2099.13	0.0555312	2022.81	0.265415	2024.37	0.0244194
								2086.36	0.137912	2110.84	0.0367996	2014.63	0.0431463	2017.92	0.0231486
								2106.33	0.00879379	2120.8	0.0858941	2067.81	0.956686	2037.65	0.0629399
								2093.75	0.20427	2135.72	1.20469	2058.95	0.00270187	2051.99	0.00062392
								2089.22	0.0905715	2144.83	0.00102174	2071.84	0.0650615	2063.68	0.872414
								2148.99	1.40412	2142.87	0.0909476	2085.27	0.236106	2067.8	0.133926
								2151.1	0.011554	2161.3	0.0062718	2098.77	0.0137858	2064.55	0.00437182
								2153.19	0.098952	2160.25	0.00734053	2083.31	0.00128484	2100.59	0.0146912
								2163.84	0.199509	2159.54	0.00269451	2092.33	0.0476496	2093.03	0.0182281
								2168.9	0.0173467	2163.59	0.214971	2101.71	0.0695008	2092.08	0.0375258
								2160.42	0.00284651	2165.4	0.0848347	2099.72	0.000914623	2095.04	0.291194
								2167.43	0.0327034	2170.33	0.341156	2100.47	0.0190578	2105.12	0.114819
								2174.23	0.0691132	2179.92	0.311523	2106.07	0.105389	2103.21	0.166858
								2169.16	0.000525462	2235.41	1.89902	2128.95	0.347898	2113.37	0.0561295
								2181.48	0.0802842	3560.35	0.00121346	2234.57	8.06216	2163.87	0.922978
								2176.51	0.045556	3567.34	0.00418314	3535.17	0.000423905	3493.95	0.0165433
								2194.53	0.219994	3587.01	0.0138529	3560	0.0046628	3476.89	0.00126935
								2299.5	7.49659	3578.76	0.00377516	3538.2	0.0750761	3488.3	0.003101
								3624.79	0.00226206	3587.76	0.00128651	3549.85	0.00118079	3471.38	0.00220632
								3646.47	0.00116388	3592.41	0.0120083	3543.6	0.00344294	3498.47	0.00390814
								3639.76	0.022904	3632.22	0.00299275	3548.53	0.00337091	3513.67	0.00965571
								3619.87	0.0147303	3647.97	0.00284697	3586.36	0.0125905	3543.32	0.0026168
								3630.76	0.00466317	3646.99	0.0106355	3580.28	0.00135043	3554.79	0.00315783
								3643.86	0.00188641	3650.42	0.00909734	3581.8	0.0517177	3560.59	0.0116119
								3658.84	0.0123768	3665.92	0.00113914	3597.02	0.000292565	3567	0.0112932
								3668.19	0.00701371	3663.22	0.00294572	3592.44	0.00383816	3573.08	0.00497152
								3666.67	0.0169649	3667.79	0.000162315	3601.51	0.00552047	3565.7	5.00115e-05
								3661.09	0.00589612	3671.11	0.00217642	3597.59	0.00520566	3568.14	0.0014504
								3682.09	5.39129e-05	3684.14	0.00523132	3603.99	0.0014469	3579.74	0.00360831
								3682.75	0.00252484	3703.96	0.00411033	3606.23	0.152891	3586.21	0.00107961
[truncated: 1,489 more rows]
